# Supplementary material for: A chemical proteomic probe for detecting native carrier protein motifs in nonribosomal peptide synthetases
Source: Royal Society of Chemistry journal article supplement (doi:10.1039/c6cc07793e), 2016-01-01

Supporting Information

**A chemical proteomic probe for detecting native carrier  
protein motifs in nonribosomal peptide synthetases**

Shota Kasai,<sup>a</sup> Fumihiro Ishikawa,<sup>a\*</sup> Takehiro Suzuki,<sup>b</sup> Naoshi Dohmae,<sup>b</sup> and Hideaki  
Kakeya<sup>a\*</sup>

*<sup>a</sup>Department of System Chemotherapy and Molecular Sciences, Division of  
Bioinformatics and Chemical Genomics, Graduate School of Pharmaceutical Sciences,  
Kyoto University, Sakyo, Kyoto, 606-8501, Japan*

*<sup>b</sup>Global Research Cluster, RIKEN, 2-1 Hirosawa, Wako, Saitama 351-0198, Japan*

\*Correspondence and request for materials should be directed via email to

Fumihiro Ishikawa (fishika@pharm.kyoto-u.ac.jp) or Hideaki Kakeya  
(scseigyohisyo@pharm.kyoto-u.ac.jp).

| <b>Contents:</b>                                             | <b>Page</b> |
|--------------------------------------------------------------|-------------|
| Supplementary Figure S1                                      | S3          |
| Supplementary Figure S2                                      | S3          |
| Supplementary Figure S3                                      | S4          |
| Supplementary Figure S4                                      | S4          |
| Supplementary Figure S5                                      | S5          |
| Supplementary Figure S6                                      | S6          |
| Supplementary Figure S7                                      | S6          |
| Supplementary Figure S8                                      | S8          |
| Supplementary Figure S9                                      | S10         |
| Supplementary Figure S10                                     | S11–13      |
| Supplementary Figure S11                                     | S14–16      |
| Supplementary Figure S12                                     | S17–19      |
| Supplementary Figure S13                                     | S19         |
| Supplementary Figure S14                                     | S20         |
| Supplementary Scheme S1                                      | S21         |
| Supplementary Scheme S2                                      | S21         |
| General methods                                              | S21–31      |
| References                                                   | S31–33      |
| Copies of <sup>1</sup> H-NMR and <sup>13</sup> C-NMR spectra | S34–41      |
| Supplementary Figure S15                                     |             |
| Supplementary Figure S16                                     |             |
| Supplementary Figure S17                                     |             |

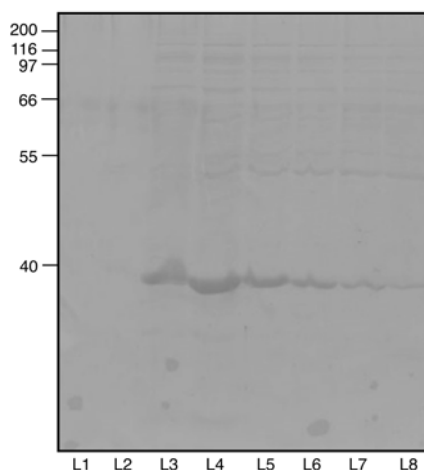

**Figure S1. Full gel displaying the purification of native Sfp.** Gel lanes depict fractions taken during anion exchange chromatography and as follows: L1 = 10 mM NaCl wash, L2 = 50 mM NaCl wash, L3–L8 = 100 mM NaCl wash. The target protein was collected and used from L3–L6. The gel was stained with Coomassie (Colloidal Coomassie Blue Stain).

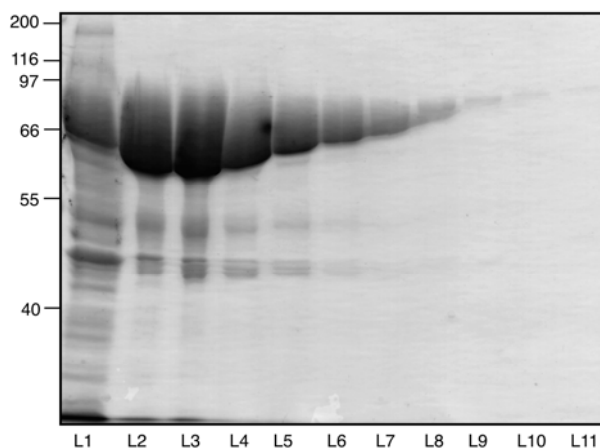

**Figure S2. Full gel displaying the purification of CoaA (PanK)-MBP.** Gel lanes depict fractions taken during amylose affinity chromatography and as follows: L1 = flow through and L2–L11 = 10 mM maltose wash. The target protein was collected and used from L2–L8. The gel was stained with Coomassie (Colloidal Coomassie Blue Stain).

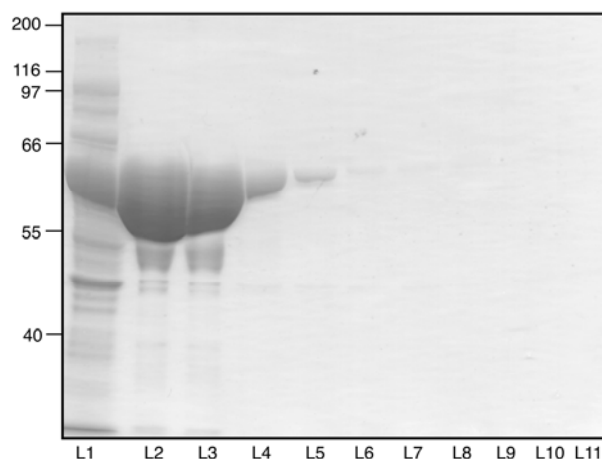

**Figure S3. Full gel displaying the purification of CoaD (PPAT)-MBP.** Gel lanes depict fractions taken during amylose affinity chromatography and as follows: L1 = flow through, L2–L11 = 10 mM maltose wash. The target protein was collected and used from L2–L5. The gel was stained with Coomassie (Colloidal Coomassie Blue Stain).

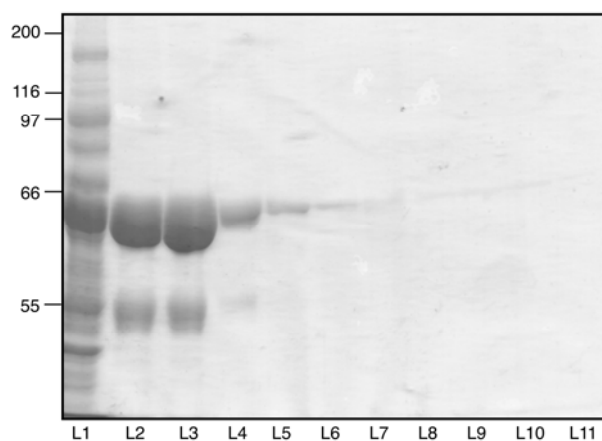

**Figure S4. Full gel displaying the purification of CoaE (DPCK)-MBP.** Gel lanes depict fractions taken during amylose affinity chromatography and as follows: L1 = flow through, L2–L11 = 10 mM maltose wash. The target protein was collected and used from L2–L6. The gel was stained with Coomassie (Colloidal Coomassie Blue Stain).

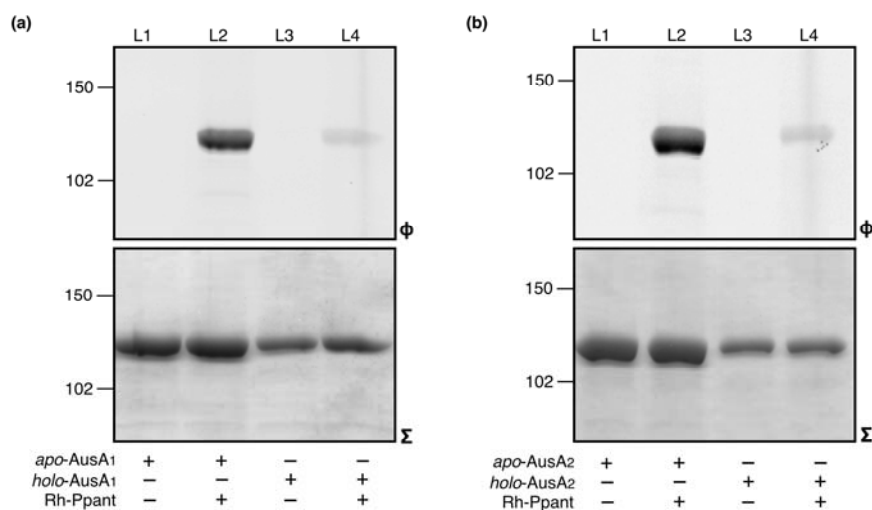

**Figure S5. Verification of the high conversion from *apo-* to *holo*-CPs of AusA1 and AusA2 with the rhodamine (Rh) pantetheine analog S12 by a one-pot chemoenzymatic method.**

(a) Attachment of Rh-Ppant analog to *apo-* and *holo*-AusA1 using CoaA (PanK), CoaD (PPAT), CoaE (DPCK), and Sfp. Reagents and enzymes were added to 50- $\mu$ L reaction mixtures in sequential order as follows. Final reaction concentrations: 50 mM potassium phosphate (pH 7.0), 8 mM ATP, 15 mM MgCl<sub>2</sub>, 0.002  $\mu$ g/ $\mu$ L CoaA-MBP, 0.01  $\mu$ g/ $\mu$ L CoaD-MBP, 0.02  $\mu$ g/ $\mu$ L CoaE-MBP, 0.01  $\mu$ g/ $\mu$ L Sfp (native), 0.04  $\mu$ g/ $\mu$ L *apo-* or *holo*-AusA1 (350 nM), and 500  $\mu$ M Rh-Ppant analog. (b) Attachment of Rh-Ppant analog S12 to *apo-* and *holo*-AusA2 using CoaA, CoaD, CoaE, and Sfp. Reagents and enzymes were added to 50- $\mu$ L reaction mixtures in sequential order as follows. Final reaction concentrations: 50 mM potassium phosphate (pH 7.0), 8 mM ATP, 15 mM MgCl<sub>2</sub>, 0.002  $\mu$ g/ $\mu$ L CoaA-MBP, 0.01  $\mu$ g/ $\mu$ L CoaD-MBP, 0.02  $\mu$ g/ $\mu$ L CoaE-MBP, 0.01  $\mu$ g/ $\mu$ L Sfp (native), 0.04  $\mu$ g/ $\mu$ L *apo-* or *holo*-AusA2 (350 nM), and 500  $\mu$ M Rh-Ppant analog S12. In negative controls, the Rh-Ppant analog S12 was replaced with DMSO. These reaction mixtures were incubated for 1 h at 37 °C. For each panel, the image ( $\Phi$ ) denotes the fluorescence observed with  $\lambda_{\text{ex}} = 532$  nm and  $\lambda_{\text{ex}} = 580$  nm and the image ( $\Sigma$ ) depicts total protein content by staining with Coomassie (Colloidal Coomassie Blue Stain).

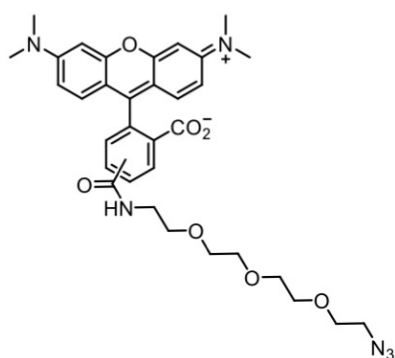

**TAMRA-azide**

**Figure S6. A Structure of TAMRA-azide detection reagent used in this study.**

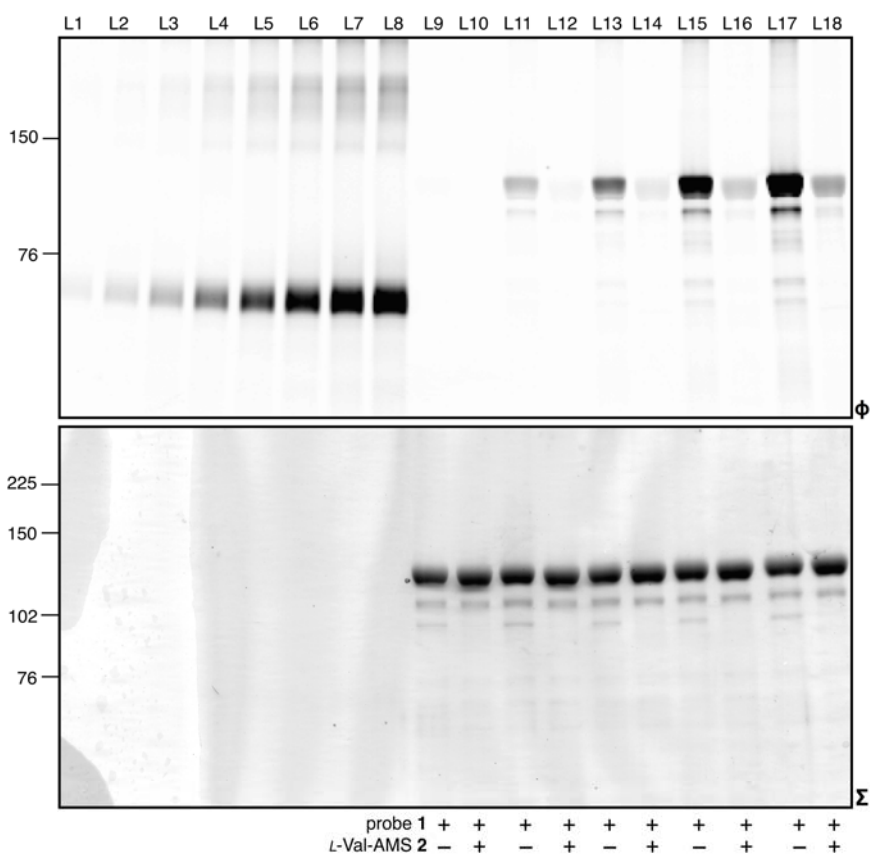

**Figure S7. Measurements of labeled recombinant *holo-AusA1*.** Fluorescent and Coomassie stained SDS-PAGE gel of Rh-BSA, a standard for fluorescent intensity and recombinant *holo-AusA1* with probe **1**. Recombinant *holo-AusA1* (1  $\mu$ M) was reacted with probe **1** (1–100  $\mu$ M) in either the absence or presence of 1 mM *L*-Val-AMS **2** for 12 h at 25  $^{\circ}$ C. Gel lanes are as follows: L1 = 50 nM Rh-BSA, L2 = 100 nM Rh-BSA, L3 = 200 nM Rh-BSA, L4 = 400 nM

Rh-BSA, L5 = 600 nM Rh-BSA, L6 = 800 nM Rh-BSA, L7 = 1000 nM Rh-BSA, L8 = 1200 nM Rh-BSA, L9 = 1  $\mu$ M *holo*-AusA1 and 1  $\mu$ M probe **1**, L10 = 1  $\mu$ M *holo*-AusA1, 1  $\mu$ M probe **1**, and 1 mM *L*-Val-AMS **2**, L11 = 1  $\mu$ M *holo*-AusA1 and 10  $\mu$ M probe **1**, L12 = 1  $\mu$ M *holo*-AusA1, 10  $\mu$ M probe **1**, and 1 mM *L*-Val-AMS **2**, L13 = 1  $\mu$ M *holo*-AusA1 and 20  $\mu$ M probe **1**, L14 = 1  $\mu$ M *holo*-AusA1, 20  $\mu$ M probe **1**, and 1 mM *L*-Val-AMS **2**, L15 = 1  $\mu$ M *holo*-AusA1 and 50  $\mu$ M probe **1**, L16 = 1  $\mu$ M *holo*-AusA1, 50  $\mu$ M probe **1**, and 1 mM *L*-Val-AMS **2**, L17 = 1  $\mu$ M *holo*-AusA1 and 100  $\mu$ M probe **1**, L18 = 1  $\mu$ M *holo*-AusA1, 100  $\mu$ M probe **1**, and 1 mM *L*-Val-AMS **2**. The image ( $\Phi$ ) denotes the fluorescence observed with  $\lambda_{\text{ex}} = 532$  nm and  $\lambda_{\text{ex}} = 580$  nm and the image ( $\Sigma$ ) depicts total protein content by staining with Coomassie (Colloidal Coomassie Blue Stain).

(a)

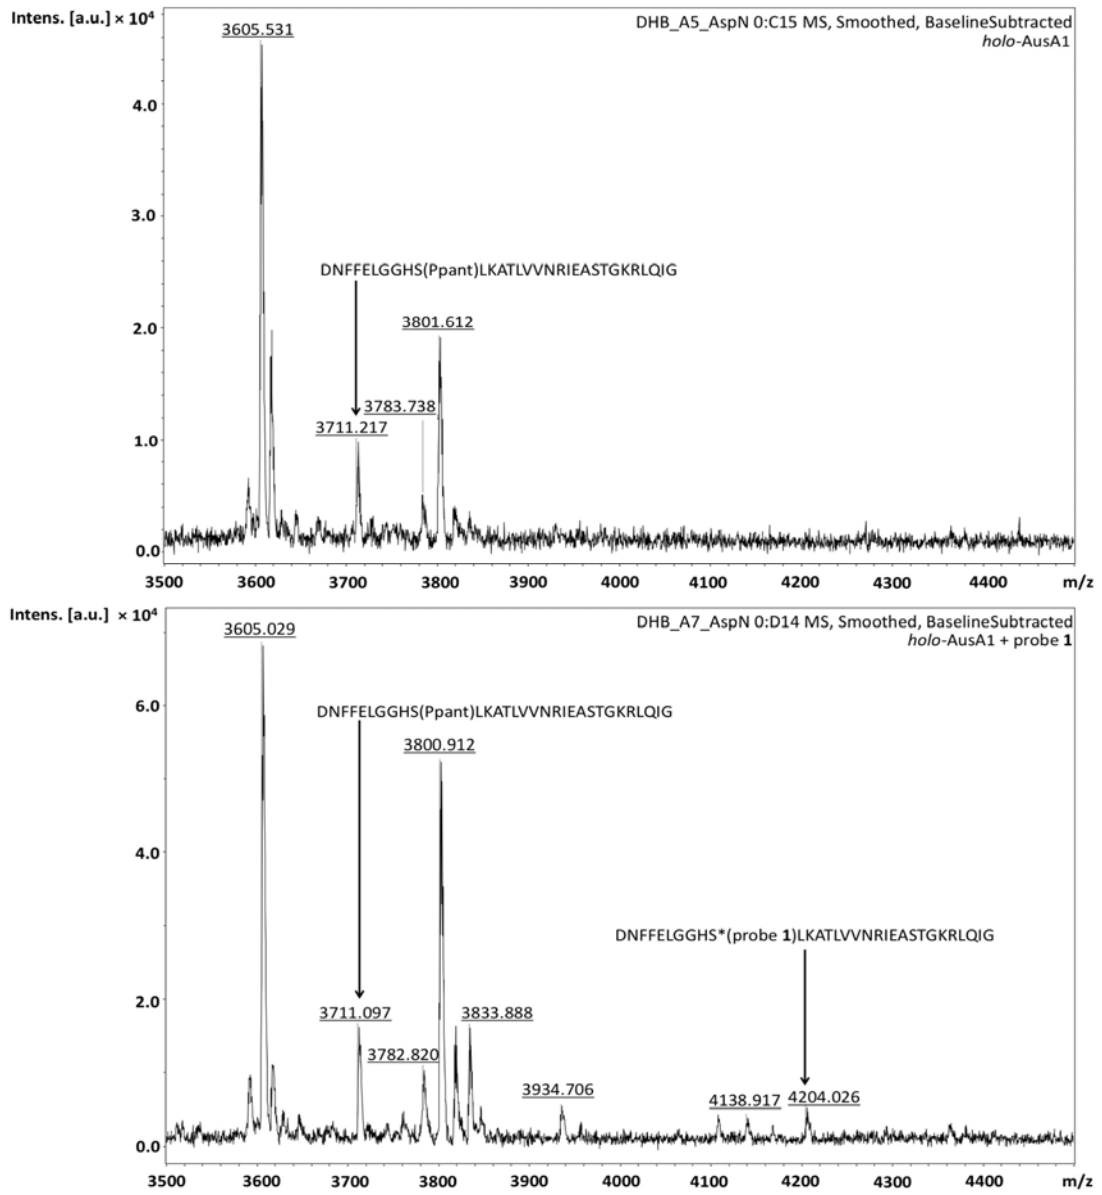

(b)

DNFFELGGHS(Ppant)LKATLVVNRIEASTGKRLQIG

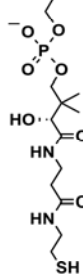

DNFFELGGHS\*(probe 1)LKATLVVNRIEASTGKRLQIG

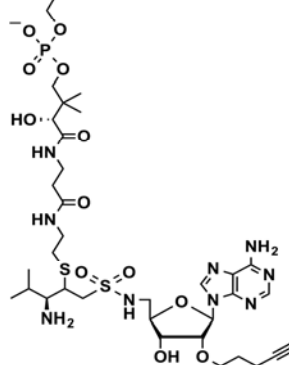



**Figure S8. MALDI-TOF mass spectra of Asp-N digestion of modified AusA1.** (a) The unmodified *holo*-AusA1 fragment with sequence DNFFELGGHS(Ppant)LKATLVVNRIEASTGKRLQIG (D932-G962 + Ppant): [D932-G962 + Ppant + H]<sup>+</sup> calcd for 3710.9088, found, 3711.097; modified peptide fragment with sequence DNFFELGGHS\*LKATLVVNRIEASTGKRLQIG (D932-G962 + Ppant + **1**): [D932-G962 + Ppant + **1** + H]<sup>+</sup> calcd for 4204.1195, found, 4204.026. In addition, these unidentified peaks show background peaks. (b) Structures of the unmodified and modified peptide fragments.

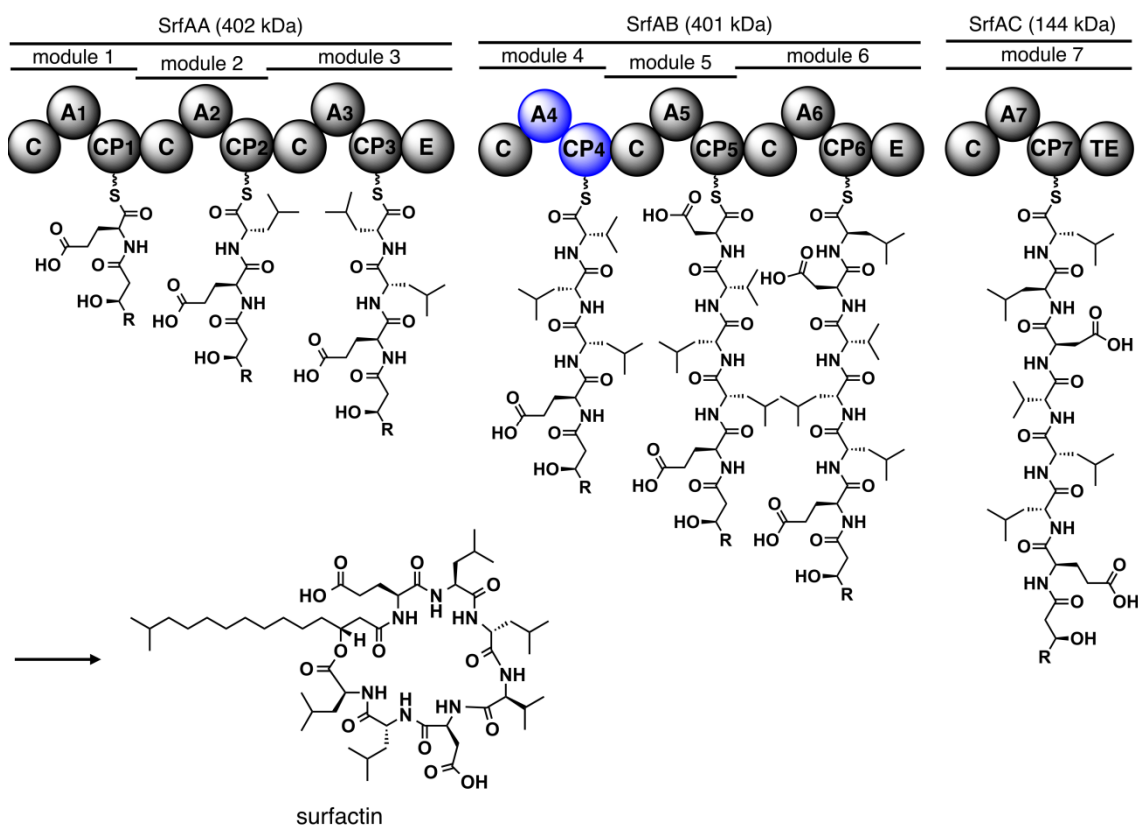

**Figure S9. Nonribosomal synthesis of the surfactin.** Modules are comprised of CP (CP1–CP7), A (A1–A7) [A1, *L*-Glu; A2, *L*-Leu; A3, *L*-Leu; A4, *L*-Val; A5, *L*-Asp; A6, *L*-Leu; A7, *L*-Leu specific A-domains], E, C, and TE domains. The target A and CP domains for probe 1 are colored blue.

1 MSKKSIIQKVY ALTPMQEGML YHAMLDPHSS SYFTQLEELGI HGAFDLEIFE  
51 KSVNELIRSY DILRTVVFHQ QLQKPRQVVL AERKTKVHYE DISHADENRQ  
101 KEHIERYKQD VQRQGFNLAK DILFKVAVFR LAADQLYLWV SNHHIMMDGW  
151 SMGVLMSLF QNYEALRAGR TPANGQGKPY SDYIKWLGKQ DNEEAESYWS  
201 ERLAGFEQPS VLPGRLPVKK DEYVNKEYSF TWDETLVARI QQTANLHQVT  
251 GPNLFQAVWG IVLSKYNFTD DVIFGTVVSF RPSEINGIET MAGLFINTIP  
301 VRVKVERDAA FADIFTAVQQ HAVEAERYDY VPLYEIQKRS ALDGNLLNHL  
351 VAFENYPLDQ ELENGSMEDR LGFSIKVESA FEQTSFDFNL IVYPGKTWTV  
401 KIKYNGAAFD SAFIERTAETH LTRMMEAAMD QPAAFVREYG LVGDDEEQRQI  
451 VEVFNSTKAE LPEGMAVHQV FEEQAKRTPA STAVVYEGTK LTYRELNAAA  
501 NRLARKLVEH GLQKGETAAI MNDRSVETVV GMLAVLKAGA AYVPLDPALP  
551 GDRLRFMAED SSVRMVLIGN SYTGQAHQLQ VPVLTLDIGF EESEAADNLN  
601 LPSAPSDLAY IMYTSGSTGK PKGVMIEHKS ILRLVKNAGY VPVTEEDRMA  
651 QTGAVSFDAG TFEVFGALLN GAALYPVKKE TLLDAKQFAA FLREQSITTM  
701 WLTSPLFNQL AAKDAGMFGT LRHLIIGGDA LVPHIVSKVK QASPSLSLWN  
751 GYGPTENTTF STSFLIDREY GGSIPIGKPI GNSTAYIMDE QQCLQPIGAP  
801 GELCVGGIGV ARGVNLPEL TEKQFLEDPF RPERIYRTG DLARWLPDGN  
851 IEFLGRIDNQ VKVRGFRIEL GEIETKLNMA EHVTEAAVII RKNKADENEI  
901 CAYFTADREV AVSELRKTLT QSLPDYMPVA HLIQMDSLPL TPNGKINKKE  
951 LPAPQSEAVQ PEYAAPKTES EKKLAEIWEG IILGKAGVTD NFFMIGGHSL  
1001 KAMMMTAKIQ EHFHKEVPIK VLFKPTIQE LALYLEENES KEEQTFEPIR  
1051 QASYQQHYPV SPAQRMYIL NQLGQANTSY NVPVLLLEG EVDKDRLENA  
1101 IQQLINRHEI LRTSFDMIDG EVVQTVHKNI SFQLEAAKGR EEDAEEIIKA  
1151 FVQPFELNRA PLVRSKLVQL EEKRHLLLID MHHIITDGSS TGILIGDLAK  
1201 IYQGADLELP QIHVKDYAVW HKEQTNQKD EEYWLDVFKG ELPILDLPAD  
1251 FERPAERSFA GERVMFGLDK QITAIKSLM AETDTTMYMF LLAAFNVLLS  
1301 KYASQDDIIV GSPTAGRTHP DLQGVPGMFV NTVALRTAPA GDKTFAQFLE  
1351 EVKTASLQAF EHQSYPLEEL IEKLPLTRDT SRSPLFSVMF NMQNMEIPSL  
1401 RLGDLKISSY SMLHHVAKFD LSLEAVEREE DIGLSFDYAT ALFKDETIRR  
1451 WSRHFVNIIK AAAANPNVRL SDVDLLSSAE TAALLEERHM TQITEATFAA  
1501 LFEKQAQQTP DHSAVKAGGN LLYRELDEQ ANQLAHLRA QGAGNEDIVA  
1551 IVMDRSAEVM VSILGVMKAG AAFLPIDPDT PEERIRYSLE DSGAKFAVVN  
1601 ERNMTAIGQY EGIIVSLDDG KWRNESKERP SSISGSRNLA YVIYTSGTTG  
1651 KPKGVIQIEHR NLTNYVSWFS EEAGLTENDK TVLLSSYAFD LGYTSMFVPL  
1701 LGGGELHIVO KETYTAPDEI AHYIKEHGIT YIKLTPSLFH TIVNTASFAK



1751 DANFESLRLI VLGGEKI IPT DVIAFRKMYG HTEFINHYGP TEATIGAIAG  
1801 RVDLYEPDAF AKRPTIGRPI ANAGALVLNE ALKLVPFGAS GQLYITGQGL  
1851 ARGYLNRPQL TAERFVENPY SPGSLMYKTG DVVRRLSDGT LAFIGRADDQ  
1901 VKIRGYRIEP KEIETVMLSL SGIQEAVVLA VSEGGLQELC AYYTSDQDIE  
1951 KAELRYQLSL TLP SHMIPAF FVQVDAIPLT ANGKTDRNAL PKPNAAQSGG  
2001 KALAAPETAL EESLCRIWQK TLGIEAIGID DNFFDLGGHS LKGMMLIANI  
2051 QAELEKSVPL KALFEQPTVR QLAAYMEASA VSGGHQVLKP ADKQDMYPLS  
2101 SAQKRMVVLN QLDRQTISYN MPSVLLMEGE LDISRLRDSL NQLVNRHESL  
2151 RTSFMEANGE PVQRIIEKAE VDLHVFEAKE DEADQKIKEF IRPFDLNDAP  
2201 LIRAALLRIE AKKHL LLLDM HHIADGVSR GIFVKELALL YKGEQLPEPT  
2251 LHYKDFAVWQ NEAEQKERMK EHEAYWMSVL SGELPELDLP LDYARPPVQS  
2301 FKGDTIRFRT GSETAKAVEK LLAETGTTLH MVLHAVFHVF LSKISGQORDI  
2351 VIGSVTAGRT NADVQDMPGM FVNTLALRME AKEQQTFAEL LELAKQTNLS  
2401 ALEHQEY PFE DLVNQLDLPR DMSRNPLFNV MVTTENPDKE QLTQLNLSIS  
2451 PYEAHQGTSK FDLTLGGFTD ENGIGLQLEY ATDLFAKETA EKWSEYVLRRL  
2501 LKAVADNPNQ PLSSLLLVTE TEKQALLEAW KGKALPVPTD KTVHQLFEET  
2551 VQRHKDRPAV TYNGQSWTYG ELNAKANRLA RILMDCGISP DDRVGVLTKP  
2601 SLEMSAAVLG VLKAGAAFVP IDPDYDQRI EYILQDSGAK LLLKQEGISV  
2651 PDSYTG DVIL LDGSR TILSL PLDENDEGNP ETAVTAENLA YMIYTS GTTG  
2701 QPKGVMVEHH ALVNLCFWHH DAFSMTAEDR SAKYAGFGFD ASIWEMFPTW  
2751 TIGAELHVID EAIRLDIVRL NDYFETNGVT ITFLPTQLAE QFMELENTSL  
2801 RVLLTGDKL KRAVKKPYTL VNNYGPTENT VVATSAEIH P EEGSLSIGRA  
2851 IANTRVYILG EGNQVQPEGV AGE LCVAGRG LARGYLNRED ETAKRFVADP  
2901 FVPGERMYRT GDLVKWVNGG IEYIGRIDQQ VKVRGYRIEL SEIEVQLAQL  
2951 SEVQDAAVTA VKDKGGNTAI AAYVTPETAD IEALKSTLKE TLPDYMIPAF  
3001 WVTNLNLPVT ANGKVDRKAL PEPDIEAGSG EYKAPTTDME ELLAGIWQDV  
3051 LGMSEVG VTD NFFSLGGDSI KGIQMASRLN QHGWKLEMKD LFQHPTIEEL  
3101 TOYVERAEGK QADQGPVEGE VILTPIQRWF FEKNFTNKHH WNQSVMLHAK  
3151 KGFDPERVEK TLQALIEHHD ALRMVYREEN GDIVQVYKPI GESKVSFEIV  
3201 DLYGSDEEML RSQIKLLANK LQSSLDLRNG PLLKAEQYRT EAGDHLLIAV  
3251 HHLVVDG VSW RILLED FASG YMQAEKEESL VFPQKTNSFK DWAEELAAFS  
3301 QSAHLLQAE YWSQIAAEQV SPLPKDCETE QRIVKDTSSV LCELTAEDTK  
3351 HLLTDVHQPY GTEINDILLS ALGLTMKEWT KGAKIGINLE GHGREDIIPN  
3401 VNISRTV GWF TAQYPV VLDI SDADASAVIK TVKENLR RIP DKG VGYGILR  
3451 YFTETAETKG FTPEISFNYL GQFDSEVKTD FFEP SAFDMG RQVSGESEAL  
3501 YALSFSGMIR NGRFVLS CSY NEKEFERATV EEQMERFKEN LLMLIRHCTE  
3551 KEDKEFTPSD FSAEDLEMDE MGDIFDML EE NLK

**Figure S10. Compiled MS/MS data of gel excised fluorescent SrfAB (##) bands from the *B. subtilis* ATCC 21332 proteome.** Amino acids of the identified peptides are colored either red or blue. The overlapped peptide sequences are colored green.



1 MEITFYPLTD AOKRIWYTEK FYPHTSISNL AGIGKLV SAD AIDYVLVEQA  
51 IQEFIRRNDA MRLRLRLDEN GEPVQYISEY RPVDIKHTDT TEDPNAIEFI  
101 SQWSREETKK PLPLYDCDLF RFSLFTIKEN EVWFYANVHH VISDGISMNI  
151 LGNAIMHIYL ELASGSETKE GISHSFIDHV LSEQEYAQSK RFEKDKAFWN  
201 KQFESVPELV SLKRNASAGG SLDAERFSKD VPEALHQQIL SFCEANKVSV  
251 LSVFQSLLAA YLYRVSGQND VVTGTFMGNR TNAKEKQMLG MFVSTVPLRT  
301 NIDGGQAFSE FVKDRMKDLM KTLRHQKYPY NLLINDLRET KSSLTKLFTV  
351 SLEYQVMQWQ KEEDLAFLTE PIFSGSGLND VSIHVKDRWD TGKLTIDFDY  
401 RTDLFSREEI NMICERMITM LENALTHPEH TIDELTLISD AEKEKLLARA  
451 GGKSVSYRKD MTIPELFQEK AELLSDHPAV VFEDRTL SYR TLHEQSARIA  
501 NVLKQKGVGP DSPVAVLIER SERMITAIMG ILKAGGAYVP IDPGFPAERI  
551 QYILED CGAD FILTESKVAA PEADAELIDL DQAIEEGAAE SLNADV NARN  
601 LAYIIYTS GT TGRPKGVMIE HRQVHHLVES LQQTIIYQSGS QTLRMALLAP  
651 FHF D ASVKQI FASLLLGQTL YIVPKKTVTN GAALTAYYRK NSIEATDGTP  
701 AHLQMLAAAG DF EGLK LKHM LIGGEGLSSV VADKLLKLFK EAGTAPRLTN  
751 VYGPTETCVD ASVHPVIPEN AVQSAYVPIG KALGNNRLYI LDQKGRLQPE  
801 GVAGELYIAG DGVGRGYLHL PELTEEKFLQ DPFVPGDRMY RTGDVVRWLP  
851 DGTIEYLGRE DDQVKVRGYR IELGEIEAVI QQAPDVAKAV VLARPDEQGN  
901 LEVCAYVVQK PGSEFAPAGL REHAARQLPD YMPAYFTEV TEIPLTPSGK  
951 VDRRKLFALE VKAVSGTAYT APRNETEKAI AAIWQDVLNV EKAGIFDNFF  
1001 ETGGHSLKAM TLLTKIHKET GIEIPLQFLF EHPTITALAE EADHRESKAF  
1051 AVIEPAEKQE HYPLSLAQOR TYIVSQFEDA GVGYNMPAAA ILEGPLDIQK  
1101 LERAFQGLIR RHESLR TSVF LENSTPRQKI HDSVDFNIEM IERGGRSDEA  
1151 IMASFVRTFD LAKAPLFRIG LLGLEENRHM L LFD MHHLIS DGVSIGIMLE  
1201 ELARIYKGEQ LPDLRLQYKD YAVWQSRQAA EGYKKDQAYW KEVFAGELPV  
1251 LQLLSDYPRP PVQSFEGDRV SIKLDAGVKD RLNRLAEQNG ATLYMVMLSA  
1301 YYTLLSKYTG QDDIIVGTPS AGRNHSDTEG IIGMFVNTLA IRSEVKQNET  
1351 FTQLISRVRK RVLDAFSHQD YPFEWLVEDL NIPRDVSRHP LFDTMFSLQN  
1401 ATEGIPAVGD LSLSVQETNF KIAKFDLTVQ ARETDEGIEI DVDYSTKLFK  
1451 QSTADRL LTH FARLLEDAAA DPEKPISEYK LLSEEEAASQ IQQFNPGRTP  
1501 YPKDKTIVQL FEEQAANTPD HTALQYEGES LTYRELNERA NRLARGILSL  
1551 GAGEGR TAAV LCERSMDMIV SILAVLKSGS AYVPIDPEHP IQRMQHFFRD  
1601 SGAKVLLTQR KLKALAEAE FKGVIVLADE EESYHADARN LALPLDSAAM  
1651 ANLTYTSGTT GTPKGNIVTH ANILRTVKET NYLSITEQDT ILGLSNYVFD  
1701 AFMFDMFGSL LNGAKLV LIP KETVLDMARL SRVIERENIS ILMITTALFH



1751 LLVDLNPACL STLRKIMFGG ERASVEHVRK ALQTVGKGKL LHMYGPSEST  
1801 VFATYHPVDE LEEHTLSVPI GKPVSNTDEVY ILDRTGHVQP AGIAGELCVS  
1851 GEGLVKGYYN RPELTEEKfv PHPFTSGERM YKTGDLARWL PNGDIEFIGR  
1901 IDHQVKIRGQ RIELGEIEHQ LQTHDRVQES VVLAVDQGAG DKLLCAYYVG  
1951 EGDISSQEMR EHAAKDLPAY MVPAVFIQMD ELPLTGNGKI DRRALPIPDA  
2001 NVSRGVSYVA PRNGTEQKVA DIWAQVLQAE QVGAYDHFFD IGGHSLAGMK  
2051 MLALVHQELG VELSLKDLFQ SPTVEGLAQV IASAEKGTAA SISPAEKQDT  
2101 YPVSSPQKRM YVLQQLEDAQ TSYNMPAVLR LTGELDVERL NSVMQQLMQR  
2151 HEALRTTFEI KDGETVQRIW EEAECEIAYF EAPEEETERI VSEFIKPFKI  
2201 DQLPLFRIGL IKHSDTEHVL LFDMHIIISD GASVGV LIEE LSKLYDGETL  
2251 EPLRIQYKDY AVWQQQFIQS ELYKKQEEHW LKELDGELPV LTLPTDYSRP  
2301 AVQTFEGDRI AFSLEAGKAD ALRRLAKETD STLYMVLLAS YSAFLSKISG  
2351 QDDIIVGSPV AGRSQADVSR VIGMFVNTLA LRTYPKGEKT FADYLNEVKE  
2401 TALSAFDAQD YPLEDLIGNV QVQRDTSRNP LFDVAVFSMQN ANIKDLTMKG  
2451 IQLEPHPFER KTAKFDLTLT ADETGGGLTF VLEYNTALFK QETIERWKQY  
2501 WMELLDVAVTG NPNQPLSSLS LVTETEKQAL LEAWKGKALP VPTDKTVHQL  
2551 FEETAQRHKD RPAVTYNGQS WTYGELNAKA NRLARILMDC GISPDDR VGV  
2601 LTKPSLEMSA AVLGVLKAGA AFVPIDPDYP DQRIEYILQD SGAKLLLKQE  
2651 GISVPDSYTG DVILLDGSRT ILSLPLDEND EENPETAVTA ENLAYMIYTS  
2701 GTTGQPKGVM VEHHALVNLC FWHHDAFSMT AEDRS AKYAG FGF DASIWEM  
2751 FPTWTIG AEL HVIEEAIRLD IVRLNDYFET NGVTITFLPT QLAEQFMELE  
2801 NTSRLVLLTG GDKLKRAVKK PYTLVN NYGP TENTVVATSA EIHPEEGSLS  
2851 IGRAIANTRV YILGEGNQVQ PEGVAGELCV AGRGLARGYL NREDETAKRF  
2901 VADPFV PGER MYRTGDLVKW TGGGIEYIGR IDQQVKVRGY RIELSEIEVQ  
2951 LAQLSEVQDA AVTAVKDKGG NTAIAAYVTP ESADIEALKS ALKETLPDYM  
3001 IPAFVWTLNE LPVTANGKVD RKALPEPDIE AGSGEYKAPT TDMEELLAGI  
3051 WQDVLGMSEV GVTDNFFSLG GDSIKGIQMA SRLNQHGWLK EMKDLFQHPT  
3101 IEELTQYVER AEGKQADQGP VEGEVILTPI QRWFFEKNFT NKHHWNQSV M  
3151 LHAKKGFDP E RVEKTLQALI EHHDALRMVY REGQEDVIQY NRGLEAASAQ  
3201 LEVIQIEGQA ADYEDRIERE AERLQSSIDL QEGLLKAGL FOAEDGDHLL  
3251 LAIHHLVVDG VSWRILLEDF AAVYTQLEQG NEPVLPQKTH SFAEYAERLQ  
3301 DFANSKAF LK EKEYWRQLEE QAVAAKLPKD RESGDQRMKH TKTIEFSLTA  
3351 EETEQLTTKV HEAYHTEMND ILLTAFGLAM KEWTGQDRVS VHLEHG HREE  
3401 IIEDLTISRT VGWFTSMYPM VLDMKHADDL GYQLKQMKED IRHVPNKGVG  
3451 YGILRYLTAP EHKEDVAFSI QPDVSFN YLG QFDEMSDAGL FTRSELPSGQ  
3501 SLSPETEKPN ALDVVGYIEN GKLTMSLAYH SLEFHEKTVQ TFSDFS KAHL  
3551 LR IIEHCLSQ DGTELT PSDL GDDDLTLDEL DKLMEIF

**Figure S11. Compiled MS/MS data of gel excised SrfAA (#) bands from the *B. subtilis* ATCC 21332 proteome.** Amino acids of the identified peptides are colored either red or blue. The overlapped peptide sequences are colored green.



1 MSKKSIIQKVY ALTPMQEGML YHAMLDPHSS SYFTQLEELGI HGAFDLEIFE  
51 KSVNELIRSY DILRTVVFHQ QLOKPRQVVL AERKTKVHYE DISHADENRQ  
101 KEHIERYKQD VQRQGFNLAK DILFKVAVFR LAADQLYLVW SNHHIMMDGW  
151 SMGVLMSLF QNYEALRAGR TPANGQGKPY SDYIKWLGKQ DNEEAESYWS  
201 ERLAGFEQPS VLPGRLPVKK DEYVNKEYSF TWDETLVARI QQTANLHQVT  
251 GPNLFQAVWG IVLSKYNFTD DVIFGTVVSG RPSEINGIET MAGLFINTIP  
301 VRVKVERDAA FADIFTAVQQ HAVEAERYDY VPLYEIQKRS ALDGNLLNHL  
351 VAFENYPLDQ ELENGSMEDR LGFSIKVESA FEQTSFDFNL IVYPGKTWTV  
401 KIKYNGAAFD SAFIERTAETH LTRMMEAADV QPAAFVREYG LVGDDEEQRQI  
451 VEVFNSTKAE LPEGMAVHQV FEEQAKRTPA STAVVYEGTK LTYRELNAAA  
501 NRLARKLVEH GLQKGETAAI MNDRSVETVV GMLAVLKAGA AYPVLPDAPL  
551 GDRLRFMAED SSVRMVLIGN SYTGQAHLQV VPVLTLDIGF EESEAADNLN  
601 LPSAPSDLAY IMYTSGSTGK PKGVMIEHKS ILRLVKNAGY VPVTEEDRMA  
651 QTGAVSFDAG TFEVFGALLN GAALYPVKKE TLLDAKQFAA FLREQSITTM  
701 WLTSPLFNQL AAKDAGMFGT LRHLIIGGDA LVPHIVSKVK QASPSLSLWN  
751 GYGPTENTTF STSFLIDREY GGSPIGKPI GNSTAYIMDE QQCLQPIGAP  
801 GELCVGGIGV ARGVNLPEL TEKQFLEDPF RPERIYRTG DLARWLPDGN  
851 IEFLGRIDNQ VKVRGFRIEL GEIETKLNMA EHVTEAAVII RKNKADENEI  
901 CAYFTADREV AVSELRKTLS QSLPDYMVPA HLIQMDSLPL TPNGKINKKE  
951 LPAPQSEAVQ PEYAAPKTES EKKLAEIWEG ILGVKAGVTD NFFMIGGHS  
1001 KAMMMTAKIQ EHFHKEVPIK VLFKPTIQE LALYLEENES KEEQTFEPIR  
1051 QASYQQHYPV SPAQRMYIL NQLGQANTSY NPAVLLLEG EVDKDRLENA  
1101 IQQLINRHEI LRTSFDMIDG EVVQTVHKNI SFQLEAAKGR EEDAEEI IKA  
1151 FVQPFELNRA PLVRSKLVQL EEKRHLLID MHHIITDGSS TGILIGDLAK  
1201 IYQGADLELP QIHVKDYAVW HKEQTNQKD EEYWLDVFKG ELPILDLPAD  
1251 FERPAERSFA GERVMFGLDK QITAQIKSLM AETDTTMYMF LLAAFNVLLS  
1301 KYASQDDIIV GSPTAGRTHP DLQGVPGMFV NTVALRTAPA GDKTFAQFLE  
1351 EVKTASLQAF EHQSYPLEEL IEKLPLTRDT SRSPLEFSVMF NMQMEIPSL  
1401 RLGDLKISSY SMLHHVAKFD LSLEAVEREE DIGLSFDYAT ALFKDETIRR  
1451 WSRHFVNIIK AAAANPNVRL SDVDLLSSAE TAALLEERHM TQITEATFAA  
1501 LFEKQAQQTP DHSAVKAGGN LLYRELEDEQ ANQLAHLRA QGAGNEDIVA  
1551 IVMDRSAEVM VSILGVMKAG AAFLPIDPDT PEERIRYSLE DSGAKFAVVN  
1601 ERNMTAIGQY EGIIVSLDDG KWRNESKERP SSISGSRNLA YVIYTSGETG  
1651 KPKGVQIEHR NLTNYVSWFS EEAGLTENDK TVLLSSYAFD LGYTSMPFVL  
1701 LGGGELHIVQ KETYTAPDEI AHYIKEHGIT YIKLTPSLFH TIVNTASFAK

1751 DANFESLRLI VLGGEKI IPT DVIAFRKMYG HTEFINHYGP TEATIGAIAG  
1801 RVDLYEPDAF AKRPTIGRPI ANAGALVLNE ALKLVPFGAS GQLYITGQGL  
1851 ARGYLNRPQL TAERFVENPY SPGSLMYKTG DVVRRLSDGT LAFIGRADDQ  
1901 VKIRGYRIEP KEIETVMLSL SGIQEAVVLA VSEGGLQELC AYYTSDQDIE  
1951 KAELRYQLSL TLP SHMIPAF FVQVDAIPLT ANGKTDRNAL PKPNAAQSGG  
2001 KALAAPETAL EESLCRIWQK TLGIEAIGID DNFFDLGGHS LKGMMLIANI  
2051 QAELEKSVPL KALFEQPTVR QLAAYMEASA VSGGHQVLKP ADKQDMYPLS  
2101 SAQKRMYVLN QLDRQTISYN MPSVLLMEGE LDISRLRDSL NQLVNRHESL  
2151 RTSFMEANGE PVQRIIEKAE VDLHVFEAKE DEADQKIKEF IRPFDLNDAP  
2201 LIRAALLRIE AKKHL LLLDM HHIADGVSR GIFVKELALL YKGEQLPEPT  
2251 LHYKDFAVWQ NEAEQKERMK EHEAYWMSVL SGELPELDLP LDYARPPVQS  
2301 FKGDTIRFRT GSETAKAVEK LLAETGTTLH MVLHAVFHVF LSKISGQRDI  
2351 VIGSVTAGRT NADVQDMPGM FVNTLALRME AKEQOTFAEL LELAKQTNLS  
2401 ALEHQEY PFE DLVNQLDLPR DMSRNPLFNV MVTTENPDKE QLTQLNLSIS  
2451 PYEAHQGTSK FDLTLGGFTD ENGIGLQLEY ATDLFAKETA EKWSEYVLR  
2501 LKAVADNPNO PLSSLLLVTE TEKQALLEAW K GKALPVPTD KTVHQLFEET  
2551 VQRHKDRPAV TYNGQSWTYG ELNAKANRLA RILMDCGISP DDRVGVLTKP  
2601 SLEMSAAVLG VLKAGAAFVP IDPDYDQRI EYILQDSGAK LLLKQEGISV  
2651 PDSYTG DVIL LDGSR TILSL PLDENDEGNP ETAVTAENLA YMIYTS GTTG  
2701 QPKGVMVEHH ALVNLCFWHH DAFSMTAEDR SAKYAGFGFD ASIWEMFPTW  
2751 TIGAELHVID EAIRLDIVRL NDYFETNGVT ITFLPTQLAE QFMELENTSL  
2801 RVLLTGDKL KRAVKKPYTL VNNYGP TENT VVATSAE IHP EEGSLSIGRA  
2851 IANTRVYILG EGNQVQPEGV AGE LCVAGRG LARGYLNRED ETAKRFVADP  
2901 FVPGERMYRT GDLVKWVNGG IEYIGRIDQQ VKVRGYRIEL SEIEVQLAQL  
2951 SEVQDAAVTA VKDKGGNTAI AAYVTPETAD IEALKSTLKE TLPDYMIPAF  
3001 WVTLNELPVT ANGKVDRKAL PEPDIEAGSG EYKAPTTDME ELLAGIWQDV  
3051 LGMSEVG VTD NFFSLGGDSI KGIQMASRLN QHGWKLEMKD LFQHPTIEEL  
3101 TQYVERAEGK QADQGPVEGE VILTPIQRWF FEKNFTNKHH WNQSVMLHAK  
3151 KGFDPERVEK TLQALIEHHD ALRMVYREEN GDIVQVYKPI GESKVSFEIV  
3201 DLYGSDEEML RSQIKLLANK LQSSLDLRNG PLLKAEQYRT EAGDHLLIAV  
3251 HHLVVDG VSW RILLED FASG YMQAEKEESL VFPQKTNSFK DWAEELAAFS  
3301 QSAHLLQQA E YWSQIAAEQV SPLPKDCETE QRIVKDTSSV LCELTAEDTK  
3351 HLLTDVHQPY GTEINDILLS ALGLTMKEWT KGAKIGINLE GHGREDIIPN  
3401 VNISR TVGW F TAQYPVLDI SDADASAVIK TVKENLRRIP DKGVGYGILR  
3451 YFTETAETKG FTPEISFNYL GQFDSEVKTD FFEP SAFDMG RQVSGESEAL  
3501 YALSFSGMIR NGRFVLS CSY NEKEFERATV EEQMERFKEN LLMLIRHCTE  
3551 KEDKEFTPSD FSAEDLEMDE MGDIFDMLEE NLK



**Figure S12. Compiled MS/MS data of gel excised fluorescent protein (###, SrfAB) bands from the *B. subtilis* ATCC 21332 proteome.** Amino acids of the identified peptides are colored either red or blue. The overlapped peptide sequences are colored green.

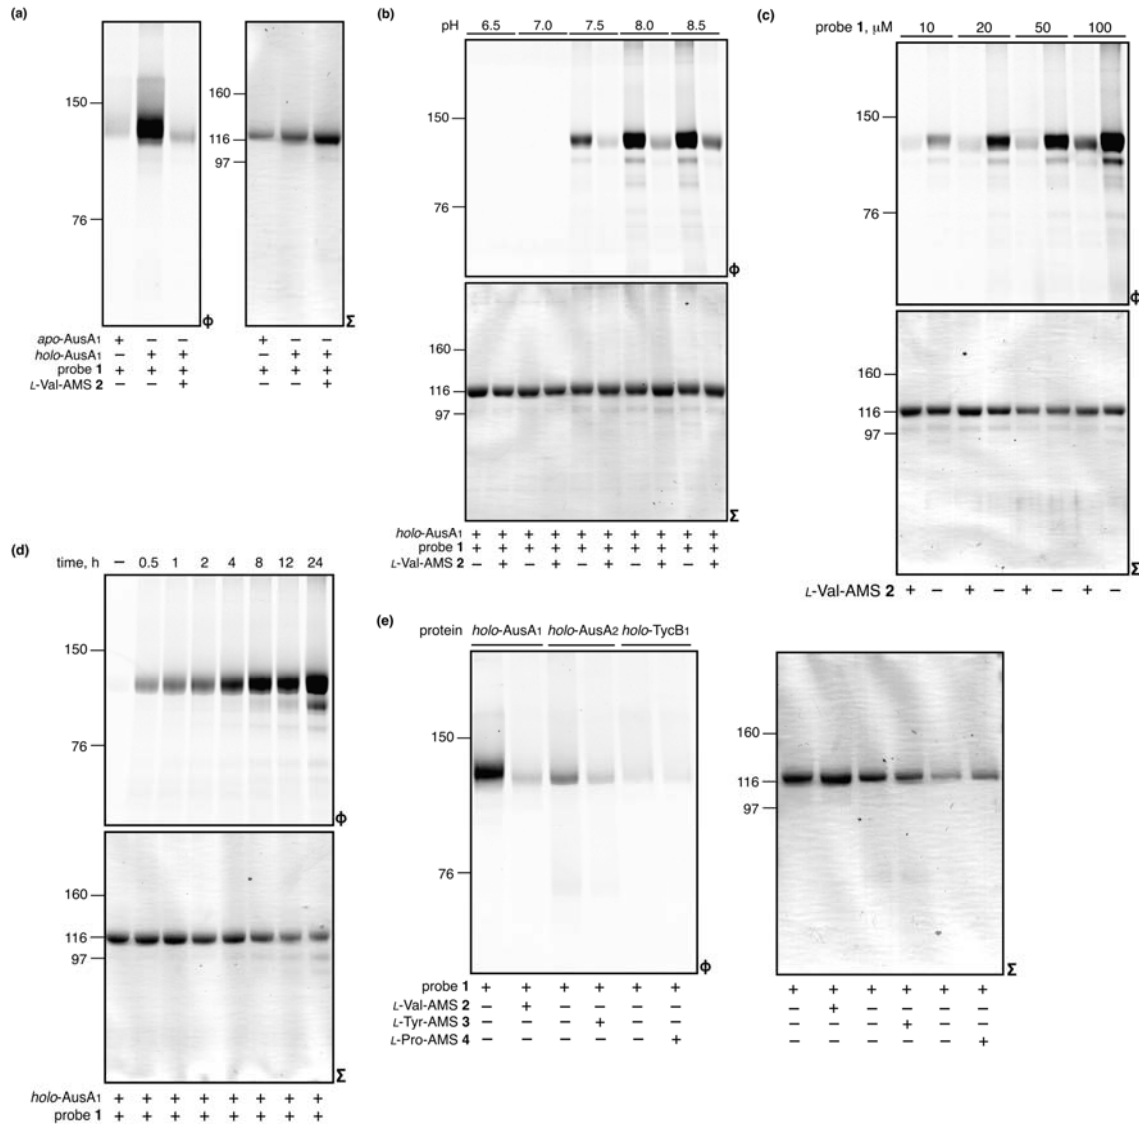

**Figure S13. Full images of SDS-PAGE gels from Figure 3.** Labeling of recombinant holo-AusA1 with probe 1. (a) SDS-PAGE analysis depicting the labeling of 350 nM apo- and holo-AusA1 in 20 mM Tris (pH 8.0) for 12 h at 25 °C in either the absence, presence, of 1 mM L-Val-AMS 2. (b) Determination of an optimal pH for the labeling of holo-AusA1. holo-AusA1 (350 nM) was incubated with 100 μM probe 1 in 20 mM Tris (pH 6.5–8.5) for 12 h at 25 °C in either the absence, or presence, of 1 mM 2. (c) Concentration dependence of *in vitro* probe labeling of holo-AusA1. holo-AusA1 (350 nM) was reacted with 10–100 μM probe 1 for 12 h at

25 °C in either the absence, or presence, of 1 mM **2**. (d) Time-course study of the labeling of *holo*-AusA1 with probe **1**. SDS-PAGE analysis denoting the labeling of 350 nM *holo*-AusA1 in 20 mM Tris (pH 8.0) for 0.5–12 h at 25 °C with 100 μM probe **1**. (e) Labeling specificity of probe **1**. *holo*-AusA1 (350 nM), *holo*-AusA2 (350 nM), and *holo*-TycB1 (350 nM) were treated with 100 μM probe **1** in either the absence, or presence, of 1 mM of inhibitors **2**, **3**, and **4**. For each panel, the image ( $\Phi$ ) denotes the fluorescence observed with  $\lambda_{\text{ex}} = 532$  nm and  $\lambda_{\text{ex}} = 580$  nm and the image ( $\Sigma$ ) depicts total protein content by staining with Coomassie (Colloidal Coomassie Blue Stain). (a) Full image for gel in Fig. 3a. (b) Full image for gel in Fig. 3b. (c) Full image for gel in Fig. 3c. (d) Full image for gel in Fig. 3d. (e) Full image for gel in Fig. 3e.

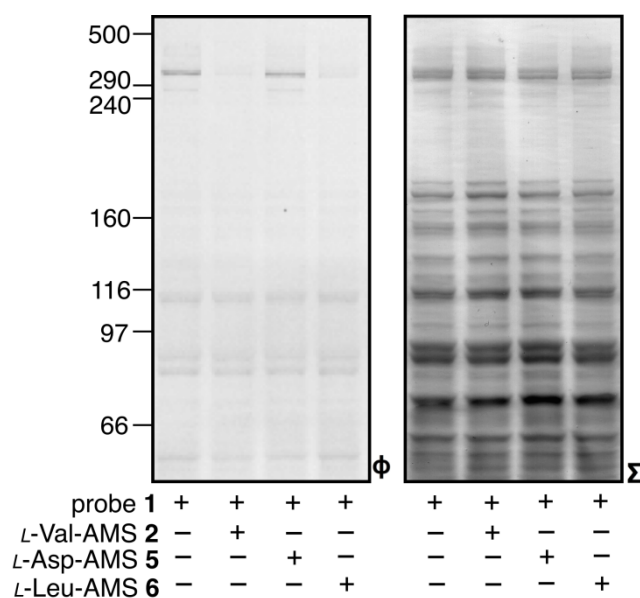

**Figure S14. Full images of SDS-PAGE gels from Figure 4.** Proteomic investigations using probe **1**. Investigation of the selective labeling of the CP4 domain of SrfAB using a combination of probe **1** and inhibitors **2**, **5**, and **6**. The *B. subtilis* ATCC 21332 proteome (2.0 mg/mL) was individually preincubated with inhibitors **2**, **5**, and **6** (10 μM) and reacted with 100 μM **1** for 2 h at 25 °C. For each panel, the image ( $\Phi$ ) denotes the fluorescence observed with  $\lambda_{\text{ex}} = 532$  nm and  $\lambda_{\text{ex}} = 580$  nm and the image ( $\Sigma$ ) depicts total protein content by staining with Coomassie (Colloidal Coomassie Blue Stain). Full image for gel in Fig. 4b.

## Chemical Synthetic Procedures

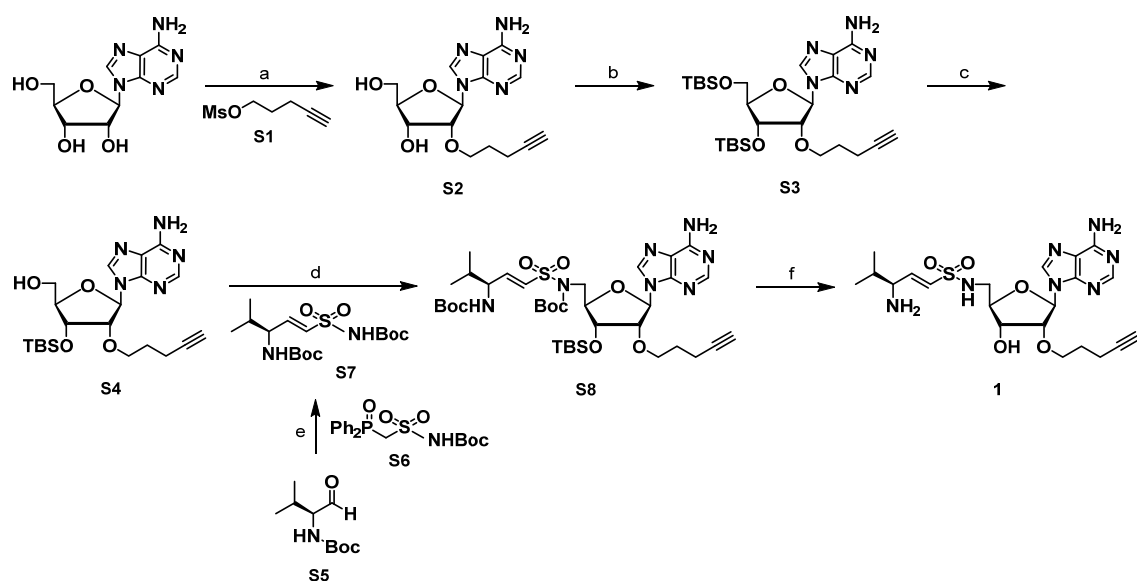

**Scheme S1. Synthetic route to probe 1.** Reagents and conditions: [a] NaH, S1, DMF, 7.1%; [b] TBSCl, imidazole, CH<sub>2</sub>Cl<sub>2</sub>, rt, 81%; [c] TCA, THF, H<sub>2</sub>O, rt, 75%; [d] S7, DEAD, Ph<sub>3</sub>P, THF, rt, 74%; [e] NaH, S6, DMF, CH<sub>2</sub>Cl<sub>2</sub>, rt, 33%; [f] 1) TFA, CH<sub>2</sub>Cl<sub>2</sub>, 0 °C; 2) TBAF, THF, rt, 98%, over two steps.

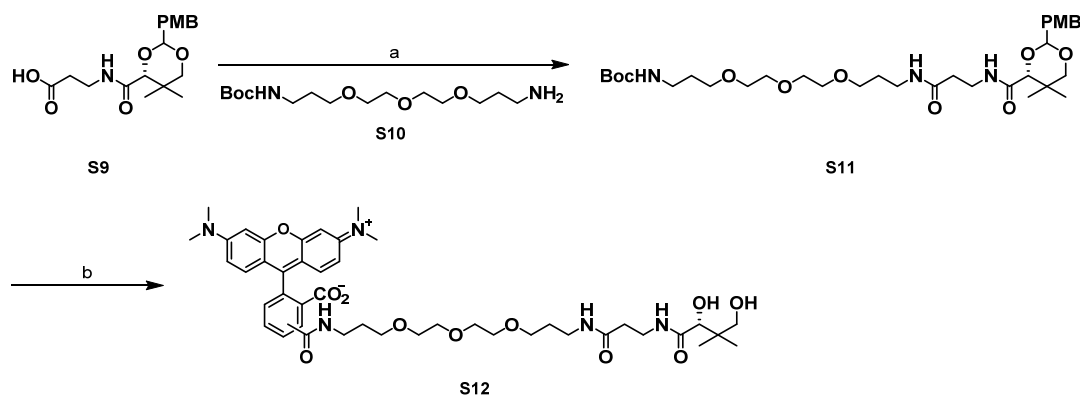

**Scheme S2. Synthetic route to a rhodamine pantetheine analog S12.** Reagents and conditions: [a] S10, EDC, HOBt, DMF, rt, 95%; [b] 1) TFA, CH<sub>2</sub>Cl<sub>2</sub>, rt; 2) Rh-OSu, DIEA, DMF, 18%, over two steps.

**General Synthetic Methods:** All commercial reagents were used as provided unless otherwise indicated. S1,<sup>1</sup> S5,<sup>2</sup> S6,<sup>3</sup> S9,<sup>4</sup> S10,<sup>5</sup> and

4-(3-chloro-5-(trifluoromethyl)pyridin-2-yl)-*N*-(4-methoxypyridin-2-yl)piperazine-1-carbothioamide (ML267)<sup>6</sup> are known compounds. These compounds were prepared according to published literature procedures. All reactions were carried out under an atmosphere of nitrogen in dry solvents with oven-dried glassware and constant magnetic stirring unless otherwise noted. High performance liquid chromatography (HPLC) was performed on a Prominence CBM-20A (Shimadzu) system equipped with a Prominence SPD-20A UV/VIS detector (Shimadzu). <sup>1</sup>H-NMR spectra were recorded at 500 MHz. <sup>13</sup>C-NMR spectra were recorded at 125 MHz on JEOL NMR spectrometers and standardized to the NMR solvent signal as reported by Gottlieb.<sup>7</sup> Multiplicities are given as s = singlet, d = doublet, t = triplet, dd = doublet of doublets, dt = doublet of triplets, br = broad signal, m = multiplet using integration and coupling constant in Hertz. TLC analysis was performed using Silica Gel 60 F254 plates (Merck) and visualization was accomplished with ultraviolet light ( $\lambda = 254$  nm) and/or the appropriate stain [phosphomolybdic acid, iodine, ninhydrin, and potassium permanganate]. Silica gel chromatography was carried out with SiliaFlash F60 230-400 mesh (Silicycle), according to the method of Still.<sup>8</sup> Mass spectral data were obtained using a LCMS-IT-TOF mass spectrometer (Shimadzu).

**Chemical Synthesis of 1** Compound number in bold refers to the structures shown in Scheme S1.

**(2*R*,3*R*,4*R*,5*R*)-5-(6-Amino-9*H*-purin-9-yl)-2-(hydroxymethyl)-4-(pent-4-yn-1-yloxy)tetrahydrofuran-3-ol (S2)**

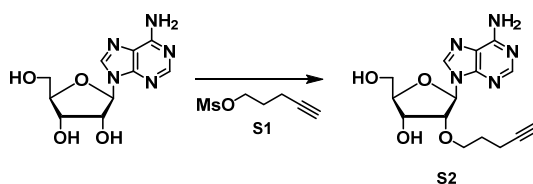

NaH (2.2 g of a 60% suspension in mineral oil, 56.1 mmol) was added to a solution of adenosine (10 g, 37.4 mmol) in DMF (150 mL). The solution was stirred at room temperature for 1 h and compound **S1** (7.4 g, 45.6 mmol) was added. After 3 days, the reaction was quenched by the addition of H<sub>2</sub>O and the DMF and H<sub>2</sub>O were removed at reduced pressure. The residue was purified by flash chromatography (CHCl<sub>3</sub> to 19:1 CHCl<sub>3</sub>/MeOH) and HPLC [COSMISIL C<sub>18</sub>-AR-II: C-18 reverse-phase column,  $\phi$  10 mm  $\times$  250 mm, MeOH/H<sub>2</sub>O (30:70), 8.0 mL/min, 210 nm,  $t_R$ : 34.0 min] to afford compound **S2** as a white solid (900 mg, 7.1%). <sup>1</sup>H NMR (500 MHz, CD<sub>3</sub>OD):  $\delta$  8.35 (s, 1H), 8.19 (s, 1H), 6.06 (d,  $J = 6.5$  Hz, 1H), 4.54 (dd,  $J = 6.5, 5.0$  Hz, 1H), 4.45 (dd,  $J = 5.0, 2.5$  Hz, 1H), 4.17 (dd,  $J = 5.5, 2.5$  Hz, 1H), 3.89 (dd,  $J =$

13.0, 3.0 Hz, 1H), 3.76 (dd,  $J = 13.0, 3.0$  Hz, 1H), 3.73–3.68 (m, 1H), 3.57–3.49 (m, 1H), 2.21–2.09 (m, 2H), 2.07 (t,  $J = 3.0$  Hz, 1H), 1.77–1.58 (m, 2H).  $^{13}\text{C}$  NMR (125 MHz,  $\text{CD}_3\text{OD}$ ):  $\delta$  157.6, 153.6, 150.0, 141.9, 121.0, 89.4, 88.6, 84.1, 83.3, 71.2, 70.3, 69.7, 63.3, 29.6, 15.5. HRMS (ESI+):  $[\text{M}+\text{H}]^+$  calcd for  $\text{C}_{15}\text{H}_{20}\text{N}_5\text{O}_4$ , 334.1510; found 334.1508.

**9-((2*R*,3*R*,4*R*,5*R*)-4-((*tert*-Butyldimethylsilyl)oxy)-5-(((*tert*-butyldimethylsilyl)oxy)methyl)-3-(pent-4-yn-1-yloxy)tetrahydrofuran-2-yl)-9*H*-purin-6-amine (S3)**

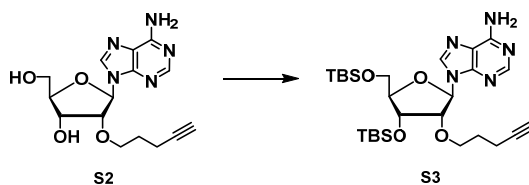

TBSCl (2.4 g, 15.9 mmol) and imidazole (2.2 g, 32.3 mmol) were added to a solution of compound **S2** (870 mg, 2.61 mmol) in  $\text{CH}_2\text{Cl}_2$  (150 mL). The solution was stirred at room temperature. After 19 h, the reaction mixture was diluted with EtOAc. The mixture was washed with a 0.1 M aqueous HCl solution, saturated  $\text{NaHCO}_3$ , and brine. The organic layer was dried over  $\text{Na}_2\text{SO}_4$  and evaporated to dryness. The residue was purified by flash chromatography (1:1.5 EtOAc/hexane) to afford compound **S3** as a white solid (1.2 g, 81%).  $^1\text{H}$  NMR (500 MHz,  $\text{CDCl}_3$ ):  $\delta$  8.35 (s, 1H), 8.23 (s, 1H), 6.14 (d,  $J = 4.1$  Hz, 1H), 5.95 (s, 2H), 4.50 (t,  $J = 4.9$  Hz, 1H), 4.28 (t,  $J = 4.3$  Hz, 1H), 4.12 (dt,  $J = 5.3, 2.9$  Hz, 1H), 4.00 (dd,  $J = 11.5, 3.5$  Hz), 3.78 (dd,  $J = 11.5, 2.3$  Hz, 1H), 3.73–3.60 (m, 2H), 2.25 (dt,  $J = 7.0, 2.5$  Hz, 2H), 1.87 (t,  $J = 2.6$  Hz, 1H), 1.85–1.67 (m, 2H), 0.94 (s, 9H), 0.92 (s, 9H), 0.11 (s, 6H), 0.11 (s, 3H), 0.10 (s, 3H).  $^{13}\text{C}$  NMR (125 MHz,  $\text{CDCl}_3$ ):  $\delta$  156.1, 152.8, 149.4, 138.9, 119.9, 86.8, 84.7, 83.3, 82.1, 69.9, 68.8, 68.7, 61.73, 28.5, 25.9, 25.6, 25.5, 18.3, 18.0, 14.9, -4.69, -5.01, -5.50, -5.57. HRMS (ESI+):  $[\text{M}+\text{H}]^+$  calcd for  $\text{C}_{27}\text{H}_{48}\text{N}_5\text{O}_4\text{Si}_2$ , 562.3239; found, 562.3298.

**((2*R*,3*R*,4*R*,5*R*)-5-(6-Amino-9*H*-purin-9-yl)-3-((*tert*-butyldimethylsilyl)oxy)-4-(pent-4-yn-1-yloxy)tetrahydrofuran-2-yl)methanol (S4)**

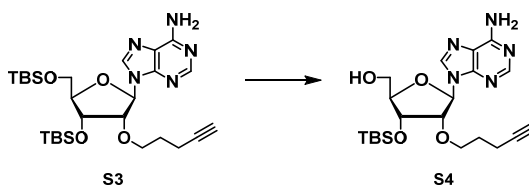

Compound **S3** (1.0 g, 1.8 mmol) was dissolved in a 4:1 (v/v) mixture of THF and  $\text{H}_2\text{O}$  at 0 °C.

Trichloroacetic acid (4.2 g, 26 mmol) was added. Stirring was continued at 0 °C for 2 h. The reaction was quenched by the addition of a 1 M aqueous NaOH solution. The resulting mixture was diluted with EtOAc. The mixture was washed with saturated NaHCO<sub>3</sub> and brine. The organic layer was dried over Na<sub>2</sub>SO<sub>4</sub> and evaporated to dryness. The residue was purified by flash chromatography (5:1 EtOAc/hexane) to afford compound **S4** as a white solid (600 mg, 75%). <sup>1</sup>H NMR (500 MHz, CDCl<sub>3</sub>): δ 8.33 (s, 1H), 7.93 (s, 1H), 6.03 (s, 2H), 5.89 (d, *J* = 7.5 Hz, 1H), 4.69 (dd, *J* = 7.8, 4.6 Hz 1H), 4.53 (d, *J* = 4.6 Hz, 1H), 4.19 (s, 1H), 3.95 (dd, *J* = 13.1, 1.7 Hz, 1H), 3.72 (d, *J* = 12.6 Hz, 1H), 3.56 (dt, *J* = 8.5, 4.6 Hz, 1H), 3.30–3.24 (m, 1H), 2.17–2.03 (m, 2H), 1.80 (t, *J* = 2.9 Hz, 1H), 1.71–1.51 (m, 2H), 0.95 (s, 9H), 0.14 (s, 3H), 0.13 (s, 3H). <sup>13</sup>C NMR (125 MHz, CDCl<sub>3</sub>): δ 156.4, 152.3, 148.5, 140.8, 121.2, 89.6, 89.5, 83.1, 81.0, 72.0, 69.1, 68.9, 62.9, 28.3, 25.7, 18.2, 14.8, -4.68, -4.72. HRMS (ESI+): [M+H]<sup>+</sup> calcd for C<sub>21</sub>H<sub>34</sub>N<sub>5</sub>O<sub>4</sub>Si, 448.2375; found, 448.2388.

***tert*-Butyl (S,E)-(1-(N-(*tert*-butoxycarbonyl)sulfamoyl)-4-methylpent-1-en-3-yl)carbamate (S7)**

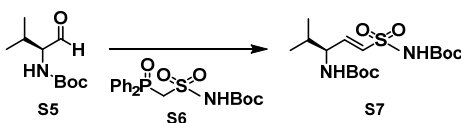

LiHMDS (7.6 mL of a 1.3 M solution in THF, 9.88 mmol) was added to a solution of compound **S6** (1.5 g, 3.96 mmol) in DMF (5 mL). The solution was stirred at room temperature for 1 h and compound **S5** (500 mg, 2.48 mmol) was added. Stirring was continued at room temperature for 3 h. The reaction mixture was diluted with EtOAc. The mixture was washed with a 0.1 M aqueous HCl solution and brine. The organic layer was dried over Na<sub>2</sub>SO<sub>4</sub> and evaporated to dryness. The residue was purified by flash chromatography (1:4 EtOAc/hexane) to afford compound **S7** as a white solid (440 mg, 47%). <sup>1</sup>H NMR (500 MHz, CDCl<sub>3</sub>): δ 7.10 (br, 1H), 6.91 (dd, *J* = 14.9, 5.2 Hz, 2H), 6.56 (d, *J* = 14.9 Hz, 1H), 4.58 (d, *J* = 8.0 Hz, 1H), 4.28 (br, 1H), 1.98–1.82 (m, 1H), 1.48 (s, 9H), 1.45 (s, 9H), 0.97 (d, *J* = 6.9 Hz, 3H), 0.94 (d, *J* = 6.9 Hz, 3H). <sup>13</sup>C NMR (125 MHz, CDCl<sub>3</sub>): δ 155.3, 149.8, 147.4, 127.9, 83.7, 80.0, 56.2, 41.1, 32.1, 28.3, 27.9, 18.8, 17.9, 14.2. HRMS (ESI+): [M+Na]<sup>+</sup> calcd for C<sub>16</sub>H<sub>30</sub>N<sub>2</sub>O<sub>6</sub>NaS, 401.1717; found, 401.1798.

***tert*-Butyl**

**(((2*R*,3*R*,4*R*,5*R*)-5-(6-amino-9*H*-purin-9-yl)-3-((*tert*-butyldimethylsilyl)oxy)-4-(pent-4-yn-1-yloxy)tetrahydrofuran-2-yl)methyl)(((S,E)-3-((*tert*-butoxycarbonyl)amino)-4-methylpent-1-**



**-en-1-yl)sulfonyl)carbamate (S8)**

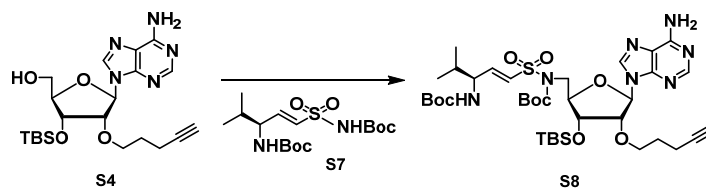

Compound **S7** (49.2 mg, 0.13 mmol), PPh<sub>3</sub> (35.2 mg, 0.13 mmol), and DEAD (60.9  $\mu$ L of a 2.2 M solution in toluene, 0.13 mmol) were added to a solution of compound **S4** (50 mg, 0.11 mmol) in THF (6 mL). The solution was stirred at room temperature. After 2 h, the reaction mixture was evaporated under reduced pressure. The residue was purified by flash chromatography (1:1 to 1:2 EtOAc/hexane and 99:1 to 97:3 CHCl<sub>3</sub>/MeOH) to afford compound **S8** as a colorless solid (70.7 mg, 78%). <sup>1</sup>H NMR (500 MHz, CDCl<sub>3</sub>):  $\delta$  8.35 (s, 1H), 8.08 (s, 1H), 6.79 (dd,  $J$  = 15.0, 5.0 Hz, 1H), 6.62 (d,  $J$  = 15.5 Hz, 1H), 6.02 (d,  $J$  = 5.5 Hz, 1H), 5.72 (br, 2H), 4.75 (t,  $J$  = 4.5 Hz, 1H), 4.56 (br, 1H), 4.43 (br, 1H), 4.36–4.27 (m, 1H), 4.16 (dd,  $J$  = 15.0, 7.0 Hz, 1H), 3.85 (dd,  $J$  = 15.0, 7.0 Hz, 1H), 3.68–3.59 (m, 1H), 3.59–3.48 (m, 1H), 2.21–2.12 (m, 1H), 1.97–1.79 (m, 1H), 1.85 (t,  $J$  = 2.5 Hz, 1H), 1.79–1.62 (m, 2H), 1.48 (s, 9H), 1.41 (s, 9H), 0.94 (s, 9H), 0.92 (d,  $J$  = 7.0 Hz, 3H), 0.89 (d,  $J$  = 7.0 Hz, 3H), 0.13 (s, 6H). <sup>13</sup>C NMR (500 MHz, CDCl<sub>3</sub>):  $\delta$  155.7, 155.2, 153.0, 151.1, 149.8, 147.1, 140.3, 128.4, 120.6, 87.5, 85.0, 83.5, 83.2, 80.2, 72.0, 69.1, 68.8, 56.2, 48.1, 32.3, 28.5, 28.4, 28.0, 25.8, 18.9, 18.2, 18.0, 15.0, –4.6, –4.7. HRMS (ESI+): [M+H]<sup>+</sup> calcd for C<sub>37</sub>H<sub>62</sub>N<sub>7</sub>O<sub>9</sub>SSi, 808.4094; found, 808.4034.

**(*S,E*)-3-Amino-*N*-(((2*R*,3*R*,4*R*,5*R*)-5-(6-amino-9*H*-purin-9-yl)-3-hydroxy-4-(pent-4-yn-1-yl oxy)tetrahydrofuran-2-yl)methyl)-4-methylpent-1-ene-1-sulfonamide (1)**

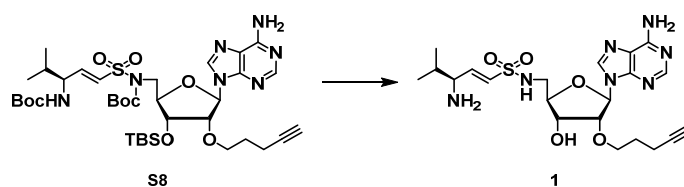

Compound **S8** (58.6 mg, 0.73 mmol) was dissolved in a 1:1 (v/v) mixture of CH<sub>2</sub>Cl<sub>2</sub> and TFA at 0 °C. Stirring was continued at 0 °C for 12 h. The flask was placed on the rotary evaporator, and the CH<sub>2</sub>Cl<sub>2</sub> and TFA were removed at reduced pressure. The residue was dissolved in THF (2 mL). The solution was stirred at room temperature and TBAF (380  $\mu$ L of a 1 M TBAF solution in THF) was added. After 10 h, the reaction mixture was evaporated to dryness. The residue was purified by HPLC [Senshu pak: PEGASIL ODS SP 100 reverse-phase column,  $\phi$  20 mm  $\times$  250

mm, acetonitrile/aqueous TFA (0.1%, 20:80), 8.0 mL/min, 210 nm,  $t_R$ : 14.5 min] to afford compound **1** as a colorless oil (37.4 mg, quant.).  $^1\text{H}$  NMR (500 MHz,  $\text{CD}_3\text{OD}$ ):  $\delta$  8.44 (s, 1H), 8.35 (s, 1H), 6.78 (d,  $J = 15.5$  Hz, 1H), 6.61 (dd,  $J = 15.5, 8.0$  Hz, 1H), 6.11 (d,  $J = 5.2$  Hz, 1H), 4.54 (t,  $J = 5.4$  Hz, 1H), 4.67 (dt,  $J = 4.7, 1.5$  Hz, 1H), 4.21 (dd,  $J = 8.0, 4.0$  Hz, 1H), 3.84–3.78 (m, 1H), 3.78–3.72 (m, 1H), 3.65–3.57 (m, 1H), 3.39 (dd,  $J = 6.0, 3.8$  Hz, 1H), 3.37 (t,  $J = 3.4$  Hz, 1H), 2.23–2.14 (m, 2H), 2.12 (t,  $J = 2.9$  Hz, 1H), 2.08–2.02 (m, 1H), 1.81–1.72 (m, 1H), 1.72–1.62 (m, 1H), 1.05 (dd,  $J = 6.9, 2.9$  Hz, 3H), 1.00 (t,  $J = 6.6$  Hz, 3H).  $^{13}\text{C}$  (125 MHz,  $\text{CD}_3\text{OD}$ ):  $\delta$  153.2, 149.7, 147.0, 143.8, 173.1, 135.3, 121.0, 89.4, 85.6, 84.1, 82.9, 71.3, 70.5, 69.8, 57.9, 45.3, 32.2, 29.6, 18.8, 17.9, 15.5. HRMS (ESI+):  $[\text{M}+\text{H}]^+$  calcd for  $\text{C}_{21}\text{H}_{32}\text{N}_7\text{O}_5\text{S}$ , 494.2180; found, 494.2242.

### *tert*-Butyl

#### (1-((4*R*)-2-(4-methoxybenzyl)-5,5-dimethyl-1,3-dioxan-4-yl)-1,5-dioxo-10,13,16-trioxa-2,6-diazanonadecan-19-yl)carbamate (**S11**)

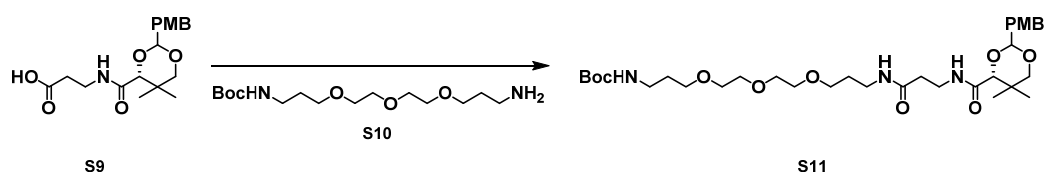

Compound **S10** (40.0  $\mu\text{L}$ , 0.013 mmol), 1-Ethyl-3-(3-dimethylaminopropyl)carbodiimide hydrochloride (29.0 mg, 0.015 mmol), 1-hydroxybenzotriazole (23.0 mg, 0.015 mmol), and *N,N*-diisopropylethylamine (26.0  $\mu\text{L}$ , 0.015 mmol) were added to a solution of compound **S9** (50.0 mg, 0.015 mmol) in DMF (20 mL). The solution was stirred at room temperature for 1 h. The reaction mixture was diluted with EtOAc. The mixture was washed with 5% citric acid, 5%  $\text{NaHCO}_3$ , and brine. The organic layer was dried over  $\text{Na}_2\text{SO}_4$  and evaporated to dryness. The residue was purified by flash chromatography (20:1  $\text{CHCl}_3/\text{MeOH}$ ) to afford compound **S11** as a colorless oil (76 mg, 95%).  $^1\text{H}$  NMR (500 MHz,  $\text{CDCl}_3$ ):  $\delta$  7.42 (d,  $J = 8.5$  Hz, 2H), 7.01 (t,  $J = 6.0$  Hz, 1H), 6.90 (d,  $J = 9.0$  Hz, 2H), 6.54 (br, 1H), 5.44 (s, 1H), 5.04 (br, 1H), 4.05 (s, 1H), 3.80 (s, 3H), 3.71–3.45 (m, 16H), 3.32 (dd,  $J = 12.0, 6.0$  Hz, 2H), 3.18 (br, 2H), 2.38 (t,  $J = 5.0$  Hz, 2H), 31.78–1.66 (m, 4H), 1.41 (s, 9H), 1.09 (s, 3H), 1.08 (s, 3H).  $^{13}\text{C}$  NMR (125 MHz,  $\text{CDCl}_3$ ):  $\delta$  171.0, 169.4, 160.3, 156.2, 130.3, 127.6, 113.8, 101.4, 84.0, 78.6, 70.6, 70.3, 70.2, 69.5, 55.4, 38.1, 35.9, 35.1, 33.2, 29.8, 28.9, 28.5, 22.0, 19.3. HRMS (ESI+):  $[\text{M}+\text{Na}]^+$  calcd for  $\text{C}_{32}\text{H}_{53}\text{N}_3\text{NaO}_{10}$ , 662.3623; found 662.3622.

### Rh-pantetheine analog (**S12**)

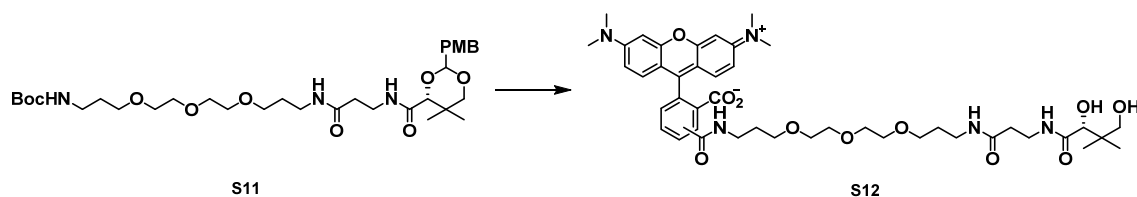

Compound **S11** (30 mg, 0.044 mmol) was dissolved in a 1:1 (v/v) mixture of  $\text{CH}_2\text{Cl}_2$  and TFA at room temperature. After 30 min, the flask was placed on the rotary evaporator and the  $\text{CH}_2\text{Cl}_2$  and TFA were removed at reduced pressure to afford TFA salt. A solution of the crude salt, 5(6)-TAMRA-OSu (25.0 mg, 0.047 mmol) and *N,N*-diisopropylethylamine (16.0  $\mu\text{L}$ , 0.092 mmol) in DMF (500  $\mu\text{L}$ ) was stirred at room temperature for 24 h. The reaction mixture was evaporated under reduced pressure. The residue was purified by HPLC [Senshu pak: PEGASIL ODS SP 100 reverse-phase column,  $\phi$  20 mm  $\times$  250 mm, acetonitrile/ $\text{H}_2\text{O}$  (35:65), 8.0 mL/min, 210 nm,  $t_{\text{R}}$ : 18.5 min] to afford compound **S12** as a pink solid (7.0 mg, 18% over two steps).  $^1\text{H}$  NMR (500 MHz,  $\text{D}_2\text{O}$ ):  $\delta$  8.48 (s, 1H), 8.08 (d,  $J = 7.0$  Hz, 1H), 7.49 (d,  $J = 8.0$  Hz, 1H), 7.08 (d,  $J = 10.0$  Hz, 2H), 6.77 (d,  $J = 9.5$  Hz, 2H), 6.25 (br, 2H), 3.90 (s, 1H), 3.76–3.10 (m, 20H), 2.38 (t,  $J = 6.0$  Hz, 1H), 2.04 (s, 12H), 1.97 (t,  $J = 6.5$  Hz, 2H), 1.70 (t,  $J = 6.0$  Hz, 2H), 0.83 (s, 3H), 0.79 (s, 3H). HRMS (ESI<sup>+</sup>):  $[\text{M}+\text{Na}]^+$  calcd for  $\text{C}_{44}\text{H}_{59}\text{N}_5\text{NaO}_{11}$ , 856.4103; found 856.4119.

### Chemical Biology Procedures

**Protein expression and materials:** Recombinant proteins *apo-AusA1*,<sup>9</sup> *apo-AusA2*,<sup>10</sup> and *holo-TycB1*<sup>11,12,13</sup> were expressed and purified as previously described. The *holo-TycB1* expression construct was kindly provided by Prof. Mohamed A. Marahiel at Philipps-Universität Marburg, Germany. Recombinant *E. coli* CoA biosynthetic enzymes (pantothenate kinase (CoaA, PanK), phosphopantetheine-adenyltransferase (CoaD, PPAT), dephospho-CoA kinase (CoaE, DPCK)) were expressed and purified as MBP-fusions as described previously.<sup>14</sup> Recombinantly expressed Sfp (PPTase; *Bacillus subtilis*) was overexpressed in *E. coli* as the native protein (untagged) and purified as described previously.<sup>14</sup> The CoaA, CoaD, CoaE, and Sfp expression constructs were kindly provided by Prof. Michael D. Burkart at University of California, San Diego, USA.

**Phosphopantetheinylation of *apo-AusA1* and *apo-AusA2*:** The *in vitro* phosphopantetheinylation of *apo-AusA1* was conducted in a 1-mL reaction vessel containing 0.1  $\mu\text{g}/\mu\text{L}$  *apo-AusA1* or 0.6  $\mu\text{g}/\mu\text{L}$  *apo-AusA2*, 0.008  $\mu\text{g}/\mu\text{L}$  Sfp (native), 15 mM  $\text{MgCl}_2$ , 1 mM TCEP, 0.5 mM CoA, and 50 mM potassium phosphate (pH 7.0) at 37  $^\circ\text{C}$  for 12 h. The reaction mixtures were dialyzed against 20 mM Tris (pH 8.0), 1 mM  $\text{MgCl}_2$ , and 1 mM TCEP

using Amicon Ultra Centrifugal Filter Units, MWCO 50 kDa (Millipore). The *holo*-AusA1 and *holo*-AusA2 proteins were quantified by the method of Bradford.<sup>15</sup> After the addition of 10% glycerol (v/v) the proteins were stored at  $-80\text{ }^{\circ}\text{C}$ .

**Fluorescent labeling of *holo*-AusA1 and *holo*-AusA2 with CoaA, CoaD, CoaE, and Sfp and Rh-Ppant analog S12:** To verify the high conversion of phosphopantetheinylation of *apo*-AusA1 and *apo*-AusA2, the one-pot reactions of *holo*-AusA1 and *holo*-AusA2 were carried out with the Rh-Ppant analog **S12**. One-pot reaction mixtures contained the following (final volume of 50  $\mu\text{L}$ ): 50 mM potassium phosphate buffer (pH 7.0), 8 mM ATP, 15 mM  $\text{MgCl}_2$ , 0.002  $\mu\text{g}/\mu\text{L}$  MBP-CoaA, 0.01  $\mu\text{g}/\mu\text{L}$  MBP-CoaD, 0.01  $\mu\text{g}/\mu\text{L}$  MBP-CoaE, 0.01  $\mu\text{g}/\mu\text{L}$  Sfp (native), and 350 nM of *holo*-AusA1 or *holo*-AusA2. In all experiments, the total DMSO concentration was kept at 1.0%. The reactions were initiated by the addition of 500  $\mu\text{M}$  Rh-Ppant analog **S12** and incubated at  $37\text{ }^{\circ}\text{C}$  for 1 h. Reactions were treated with 5 $\times$  SDS-loading buffer (strong reducing) and subjected to SDS-PAGE. Fluorescent gel visualization was performed using a Typhoon 9410 Gel and Blot Imager (GE Healthcare).

**Labeling of recombinant *apo*-AusA1 and *holo*-AusA1 by probe 1:** Standard conditions for probe **1**-recombinant protein reactions were as follows: recombinant *apo*-AusA1 (350 nM) and *holo*-AusA1 (350 nM) were treated with probe **1** (100  $\mu\text{M}$  from a 10 mM stock in DMSO) in 20 mM Tris (pH 8.0), 1 mM TCEP, and 1 mM  $\text{MgCl}_2$ . The inhibition study was carried out by pre-incubation of *holo*-AusA1 (350 nM) with *L*-Val-AMS **2** (1 mM from a 100 mM stock in DMSO) for 10 min at room temperature. In all experiments, the total DMSO concentration was kept at 2.0%. After 12 h at room temperature, these samples were subjected to the click reaction. Rh-azide, TCEP, TBTA ligand, and  $\text{CuSO}_4$  were added to provide final concentrations of 100  $\mu\text{M}$ , 1 mM, 100  $\mu\text{M}$ , and 1 mM, respectively. After 1 h at room temperature, 5 $\times$  SDS-loading buffer (strong reducing) was added and the samples were heated at  $95\text{ }^{\circ}\text{C}$  for 5 min. Samples were separated by 1D SDS-PAGE and fluorescent gel visualization was performed using a Typhoon 9410 Gel and Blot Imager (GE Healthcare).

**Determination of an optimal pH for the labeling of *holo*-AusA1 by probe 1:** Recombinant *holo*-AusA1 (350 nM) was incubated with probe **1** (100  $\mu\text{M}$  from a 10 mM stock in DMSO) in 20 mM Tris-HCl, pH 6.5, 7.0, 7.5, 8.0, and 8.5, 1 mM  $\text{MgCl}_2$ , and 1 mM TCEP. For inhibition studies, *holo*-AusA1 (350 nM) was pre-incubated with *L*-Val-AMS **2** (1 mM from a 100 mM stock in DMSO) for 10 min at room temperature. In all experiments, the total DMSO concentration was kept at 2.0%. After 12 h at room temperature, these samples were reacted with Rh-azide for 1 h at room temperature. Reactions were treated with 5 $\times$  SDS-loading buffer (strong reducing) and subjected to SDS-PAGE. Fluorescent gel visualization was performed using a Typhoon 9410 Gel and Blot Imager (GE Healthcare).

**Concentration dependence of the *in vitro* probe labeling of *holo*-AusA1:** Recombinant

*holo*-AusA1 (350 nM) was treated with probe **1** (10–100  $\mu$ M) in 20 mM Tris (pH 8.0), 1 mM TCEP, and 1 mM MgCl<sub>2</sub>. For inhibition studies, *holo*-AusA1 (350 nM) was pre-incubated with *L*-Val-AMS **2** (1 mM from a 100 mM stock in DMSO) for 10 min at room temperature. In all experiments, the total DMSO concentration was kept at 2.0%. These reaction mixtures were incubated for 12 h at room temperature. These samples were reacted with Rh-azide for 1 h at room temperature and separated by gel electrophoresis. Fluorescent gel visualization was performed using a Typhoon 9410 Gel and Blot Imager (GE Healthcare).

**Time-course studies of the labeling of *holo*-AusA1 with probe **1**:** Recombinant *holo*-AusA1 (350 nM) was treated with probe **1** (100  $\mu$ M from a 10 mM stock in DMSO) in 20 mM Tris (pH 8.0), 1 mM TCEP, and 1 mM MgCl<sub>2</sub>. In all experiments, the total DMSO concentration was kept at 2.0%. These reaction mixtures were incubated for the indicated time (0–24 h) at room temperature. These samples were reacted with Rh-azide for 1 h at room temperature and separated by gel electrophoresis. Fluorescent gel visualization was performed using a Typhoon 9410 Gel and Blot Imager (GE Healthcare).

**Comparison of the labeling properties of probe **1** with *holo*-AusA1, *holo*-AusA2, and *holo*-TycB1:** For *holo*-AusA1 (A: *L*-Val), *holo*-AusA2 (A: *L*-Tyr), and *holo*-TycB1 (A: *L*-Pro) labeling experiments, probe **1** (100  $\mu$ M from a 10 mM stock in DMSO) were individually added to a 46- $\mu$ L reaction vessel containing either *holo*-AusA1 (350 nM), *holo*-AusA2 (350 nM), or *holo*-TycB1 (350 nM), and 20 mM Tris (pH 8.0), 1 mM TCEP, and 1 mM MgCl<sub>2</sub>. For inhibition studies, *holo*-AusA1 (350 nM), *holo*-AusA2 (350 nM), and *holo*-TycB1 (350 nM) were pre-incubated with *L*-Val-AMS **2**, *L*-Tyr-AMS **3**, and *L*-Pro-AMS **4** (1 mM from a 100 mM stock in DMSO), respectively, for 10 min at room temperature. In all experiments, the total DMSO concentration was kept at 2.0%. After 12 h at room temperature, these samples were reacted with Rh-azide for 1 h at room temperature. Reactions were treated with 5 $\times$  SDS-loading buffer (strong reducing) and subjected to SDS-PAGE. Fluorescent gel visualization was performed using a Typhoon 9410 Gel and Blot Imager (GE Healthcare).

**Measurements of the percentage of *holo*-AusA1 labeled by probe **1**:** Recombinant *holo*-AusA1 (1  $\mu$ M) was treated with probe **1** (1, 10, 20, 50, and 100  $\mu$ M) for 12 h at room temperature in 20 mM Tris (pH 8.0), 1 mM TCEP, and 1 mM MgCl<sub>2</sub>. For inhibition studies, recombinant *holo*-AusA1 (1  $\mu$ M) was pre-incubated with *L*-Val-AMS **2** (1 mM from a 100 mM stock in DMSO) for 10 min at room temperature. In all experiments, the total DMSO concentration was kept at 2.0%. After 12 h at room temperature, these samples were reacted with Rh-azide for 1 h at room temperature. Reactions were treated with 5 $\times$  SDS-loading buffer (strong reducing) and subjected to SDS-PAGE. Fluorescent gel visualization was performed using a Typhoon 9410 Gel and Blot Imager (GE Healthcare). Protein labeling by probe **1** was quantitated by measuring integrated band intensities using ImageJ. A TAMRA-conjugated BSA

(50, 100, 200, 400, 600, 800, 1000, and 1200 nM) (Thermo Fisher Scientific) was used as a standard of fluorescence intensity.

**Peptide mapping of the labeled *holo*-AusA1:** Recombinant *holo*-AusA1 (350 nM) was reacted with probe **1** (50  $\mu$ M) for 12 h at room temperature in 20 mM Tris (pH 8.0), 1 mM TCEP, and 1 mM MgCl<sub>2</sub>. The proteins were subjected to SDS-PAGE and visualized using Coomassie Brilliant Blue (CBB) staining. The bands were excised, destained, and subjected to in-gel digestion with an endoproteinase Asp-N sequence grade (Roche). The digest mixture was analyzed by matrix-assisted laser desorption/ionization time-of-flight mass spectrometry (MALDI-TOF-MS) using a UltrafleXtreme mass spectrometer (Bruker Daltonics) in a positive mode.  $\alpha$ -Cyano-4-hydroxycinnamic acid (CHCA, Bruker Daltonics) was used as a matrix. Selected MS ion peaks were applied to the tandem mass spectrometry using LIFT mode.

**Preparation of lysates for proteomic labeling experiments:** *Bacillus subtilis* (Ehrenberg) Cohn (ATCC 21332) was obtained from the American Type Culture Collection (ATCC). The seed culture from frozen stock was revived for 24 h and grown in a minimal salt (MS) medium with 4  $\mu$ M of Fe<sup>2+</sup> at 30 °C at 200 rpm.<sup>16</sup> The medium contained 4% glucose, 30 mM KH<sub>2</sub>PO<sub>4</sub>, 40 mM Na<sub>2</sub>HPO<sub>4</sub>, 50 mM NH<sub>4</sub>NO<sub>3</sub>, 800  $\mu$ M MgSO<sub>4</sub>, 4  $\mu$ M FeSO<sub>4</sub>, 7  $\mu$ M CaCl<sub>2</sub>, and 4  $\mu$ M sodium EDTA.<sup>16</sup> The seed cultures (1 mL) was transferred to 200 mL of medium which contained 4% glucose, 30 mM KH<sub>2</sub>PO<sub>4</sub>, 40 mM Na<sub>2</sub>HPO<sub>4</sub>, 50 mM NH<sub>4</sub>NO<sub>3</sub>, 800  $\mu$ M MgSO<sub>4</sub>, 2 mM FeSO<sub>4</sub>, 7  $\mu$ M CaCl<sub>2</sub>, and 4  $\mu$ M sodium EDTA and the resulting mixture was incubated for 24 h at 30 °C at 200 rpm.<sup>16</sup> The cells were harvested by centrifugation and stored in the freezer until used. The frozen cell pellet was resuspended in 20 mM Tris (pH 8.0), 1 mM MgCl<sub>2</sub>, 1 mM TCEP, and protease inhibitor cocktail. Because of the lability of the synthetase during mechanical cell disruption processes,<sup>17</sup> a gentle treatment of cells with lysozyme (0.2 mg/mL) was used to release intracellular protein. The cell suspension was incubated at 0 °C for 30 min. The mixture was then incubated at 30 °C for 30 min. The solution was centrifuged for 5 min at 15,000 rpm and the pellet was discarded. The total protein concentration was quantitated by the method of Bradford.<sup>15</sup>

**SrfAB labeling of *B. subtilis* ATCC 21332 proteomes:** *B. subtilis* ATCC 21332 proteome (2.0 mg/mL) was treated with probe **1** (100  $\mu$ M from a 10 mM stock in DMSO) in 20 mM Tris (pH 8.0), 1 mM TCEP, and 1 mM MgCl<sub>2</sub>. Inhibition studies were performed by pre-incubation of proteome (2.0 mg/mL) with *L*-Val-AMS **2** (1 mM from a 100 mM stock in DMSO) for 10 min at room temperature. In all experiments, the total DMSO concentration was kept at 2.0%. These reaction mixtures were incubated for the indicated time (0–12 h) at room temperature. These samples were reacted with Rh-azide for 1 h at room temperature and separated by gel electrophoresis. Fluorescent gel visualization was performed using a Typhoon 9410 Gel and Blot Imager (GE Healthcare).

**Selective labeling of the CP<sub>4</sub> domain of SrfAB in native proteomic environments:** *B. subtilis* ATCC 21332 proteome (2.0 mg/mL) was individually treated with *L*-Val-AMS **2**, *L*-Asp-AMS **5**, and *L*-Leu-AMS **6** (10 μM from 1 mM and 500 μM stock in DMSO, respectively). These samples were incubated for 10 min at room temperature and subsequently reacted with probe **1** (100 μM from a 10 mM stock in DMSO). In all experiments, the total DMSO concentration was kept at 2.0%. After 2 h at room temperature, these mixtures were treated with Rh-azide for 1 h at room temperature and separated by gel electrophoresis. Fluorescent gel visualization was performed using a Typhoon 9410 Gel and Blot Imager (GE Healthcare).

**Mass spectroscopic analysis, 1D SDS-PAGE, and in-gel digestion:** The proteins [SrfAA, SrfAB, and ### (hydrolyzed SrfAB)] were separated by 1D SDS-PAGE by using 6% wide range gels (Nacalai Tesque) and visualized using Sil-best stain one (Nacalai Tesque) or Coomassie Brilliant Blue (CBB) staining. The bands were excised, destained, and subjected to in-gel digestion with TPCK-treated bovine trypsin (Worthington Biochemical Corporation). The digest mixtures were separated using a nanoflow LC (Easy nLC, Thermo Fisher Scientific) on a NTCC analytical column (C-18 reverse-phase column,  $\phi$  0.075 × 100 mm, 3 μm bead size, Nikkyo Technos Co., Ltd.). Buffer compositions were as follows: buffer A was composed of 100% H<sub>2</sub>O and 0.1% formic acid, buffer B was composed of 100% acetonitrile and 0.1% formic acid. Peptides were eluted from the C-18 column using a linear gradient of 0–35% buffer B over 10 min at a flow rate of 300 nL/min and subjected to a Q-Exactive mass spectrometer (Thermo Fisher Scientific) in positive mode with a nanospray ion source using the data-dependent TOP10 MS/MS method. Peptide identifications were made using MS/MS ions search toward the NCBI-nr database using the MASCOT program v2.5 (Matrix Science Inc.). The taxonomy was selected as *B. subtilis*. In addition, the variable modifications were selected as acetyl (protein *N*-terminal), deamidated (NQ), Gln->pyro-Glu (*N*-terminal Q), oxidation (M), and propionamide (C).

## References

1. Rivero, M. R.; Alonso, I.; Carretero, J. C. Vinyl sulfoxides as stereochemical controllers in intermolecular Pauson-Khand reactions: applications to the enantioselective synthesis of natural cyclopentanoids. *Chem. Eur. J.* **2004**, *10*, 5443–5459.
2. Skiles, J. W.; Miao, C.; Sorcek, R.; Jacober, S.; Mui, P. W.; Chow, G.; Weldon, S. M.; Passanza, G.; Skoog, M.; Keirns, J.; Letts, G.; Rosenthal, A. S. Inhibition of human leukocytelastase by *N*-substituted peptides containing  $\alpha,\alpha$ -difluorostatone residues at P<sub>1</sub>. *J. Med. Chem.* **1992**, *35*, 4795–4808.
3. Reuter, D. C.; McIntosh, J. E.; Guinn, A. C.; Madera, A. M. Synthesis of vinyl sulfonamides

- using the Horner reaction. *Synthesis* **2003**, 15, 2321–2324.
- Clarke, K. M.; Mercer, A. C.; La Clair, J. J.; Burkart, M. D. In vivo reporter labeling of protein via metabolic delivery of coenzyme A analogs. *J. Am. Chem. Soc.* **2005**, 127, 11234–11235.
  - Braun, M.; Hartnagel, U.; Ravanelli, E.; Achae, B.; Böttcher, C.; Vostrowsky, O.; Hirsch, A. Amphiphilic [5:1]- and [3:3]-hexakisadducts of C<sub>60</sub>. *Eur. J. Org. Chem.* **2004**, 1983–2001.
  - Foley, T. L.; Rai, G.; Yasgar, A.; Daniel, T.; Baker, H. L.; Attene-Ramos, M.; Kosa, N. M.; Leister, W.; Burkart, M. D.; Jadhav, A.; Simeonov, A.; Maloney, D. J. 4-(3-Chloro-5-(trifluoromethyl)pyridine-2-yl)-N-(4-methoxypyridin-2-yl)piperazine-1-carboxamide (ML267), a potent inhibitor of bacterial phosphopantetheinyl transferase that attenuates secondary metabolism and thwarts bacterial growth. *J. Med. Chem.* **2014**, 57, 1063–1078.
  - Gottlieb, H. E.; Kotlyar, V.; Nudelman, A. NMR chemical shifts of common laboratory solvents as trace impurities. *J. Org. Chem.* **1997**, 62, 7512–7515.
  - Still, W. C.; Kahn, A.; Mitra, A. Rapid chromatographic technique for preparative separations with moderate resolution. *J. Org. Chem.* **1978**, 43, 2923–2925.
  - Konno, S.; Ishikawa, F.; Suzuki, T.; Dohmae, N.; Burkart, M. D.; Takeya, H. Active site-directed proteomic probes for adenylation domains in nonribosomal peptide synthetases. *Chem. Commun.* **2015**, 51, 2262–2265.
  - Ishikawa, F.; Miyamoto, K.; Konno, S.; Kasai, S.; Takeya, H. Accurate detection of adenylation domain functions in nonribosomal peptide synthetases by an enzyme-linked immunosorbent assay system using active site-directed probes for adenylation domains. *ACS Chem. Biol.* **2015**, 10, 2816–2826.
  - Stachelhaus, T.; Hüser, A.; Marahiel, M. A. Biochemical characterization of peptidyl carrier protein (PCP), the thiolation domain of multifunctional peptide synthetases. *Chem. Biol.* **1996**, 3, 913–921.
  - Mootz, H. D.; Marahiel, M. A. The tyrocidine biosynthesis operon of *Bacillus brevis*: complete nucleotide sequence and biochemical characterization of functional internal adenylation domains. *J. Bacteriol.* **1997**, 179, 6843–6850.
  - Stachelhaus, T.; Mootz, H.; Bergendahl, V.; Marahiel, M. A. Peptide bond formation in nonribosomal peptide biosynthesis. *J. Biol. Chem.* **1998**, 273, 22773–22781.
  - Haushalter, R. W.; Worthington, A. S.; Hur, G. H.; Burkart, M. D. An orthogonal purification strategy for isolating crosslinked domains of modular synthases. *Bioorg. Med. Chem. Lett.* **2008**, 18, 3039–3042.
  - Bradford, M. M. A rapid and sensitive method for the quantitation of microgram quantities of protein utilizing the principle of protein-dye binding. *Anal. Biochem.* **1976**, 72, 248–254.



16. Wei, Y.-H.; Chu, I.-M. Enhancement of surfactin production in iron-enriched media by *Bacillus subtilis* ATCC 21332. *Enzyme Microb. Technol.* **1998**, 22, 724–728.
17. Augenstein, D. C.; Thrasher, K. D.; Sinskey, A. J., Wang, D. I. C. Optimization in the recovery of a labile intracellular enzyme. *Biotechnol. Bioeng.* **1974**, 16, 1433–1447.

$^1\text{H-NMR}$  (500 MHz) and  $^{13}\text{C-NMR}$  (125 MHz) spectra of **S2** in  $\text{CD}_3\text{OD}$

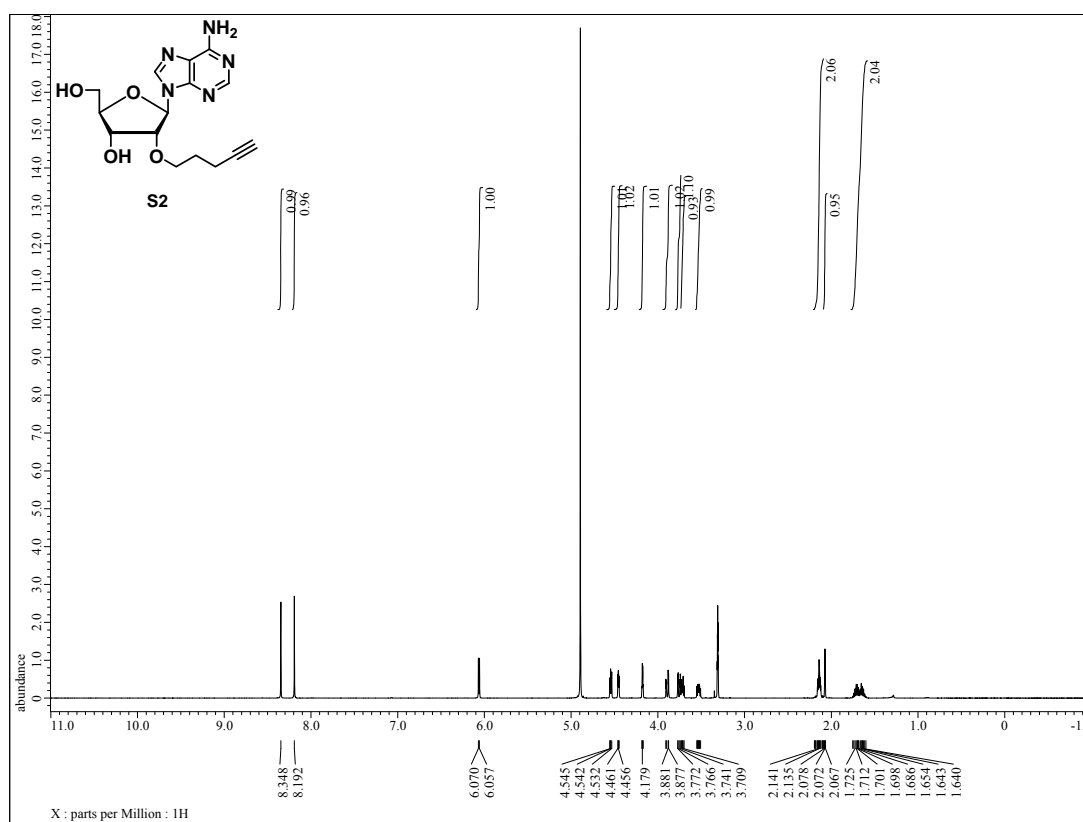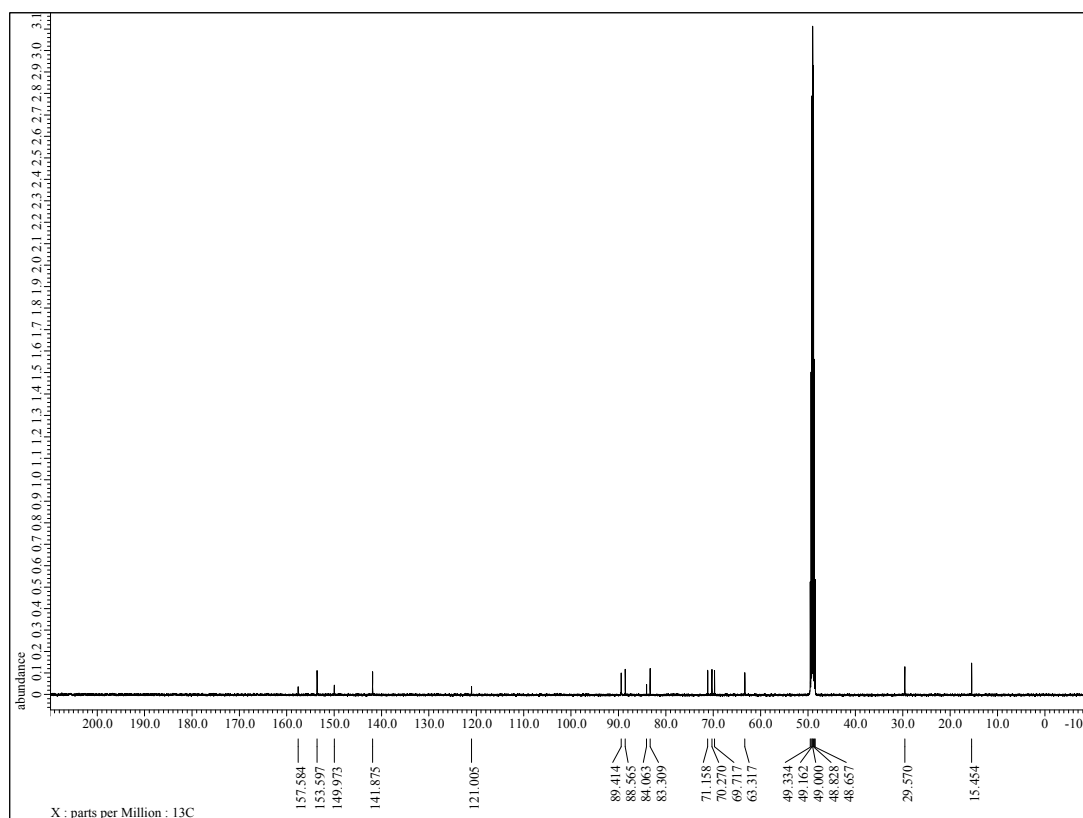

$^1\text{H-NMR}$  (500 MHz) and  $^{13}\text{C-NMR}$  (125 MHz) spectra of **S3** in  $\text{CDCl}_3$

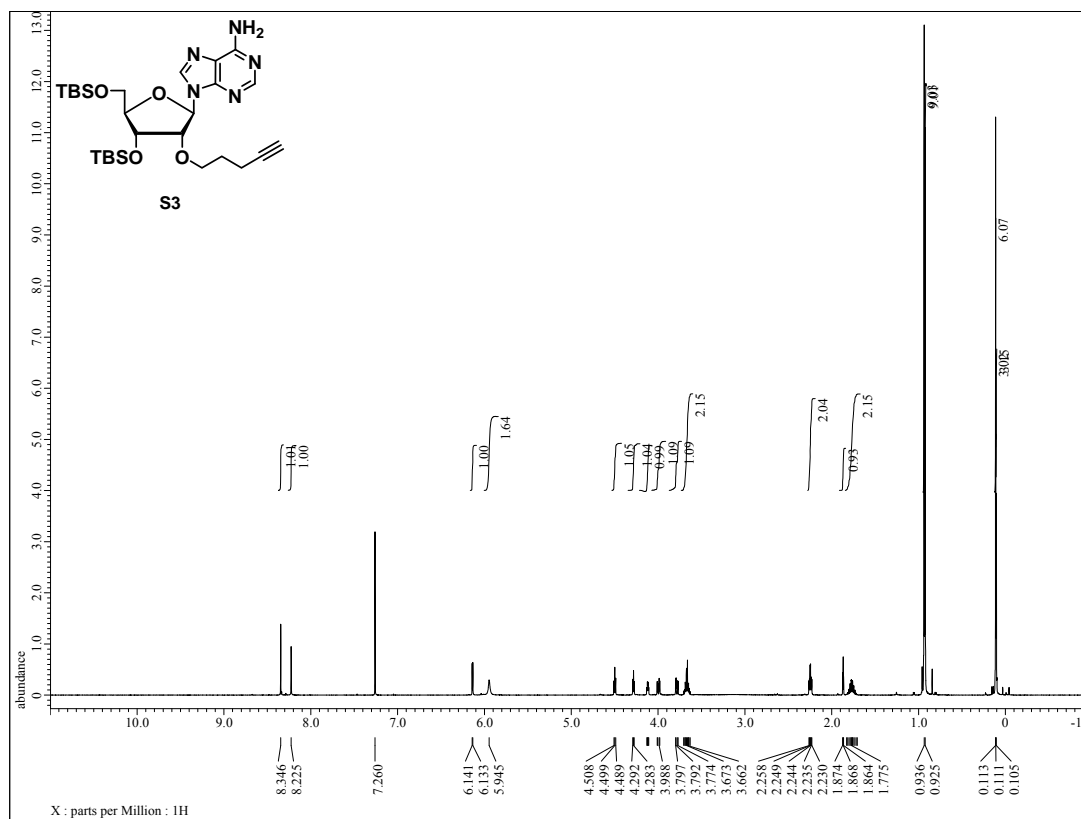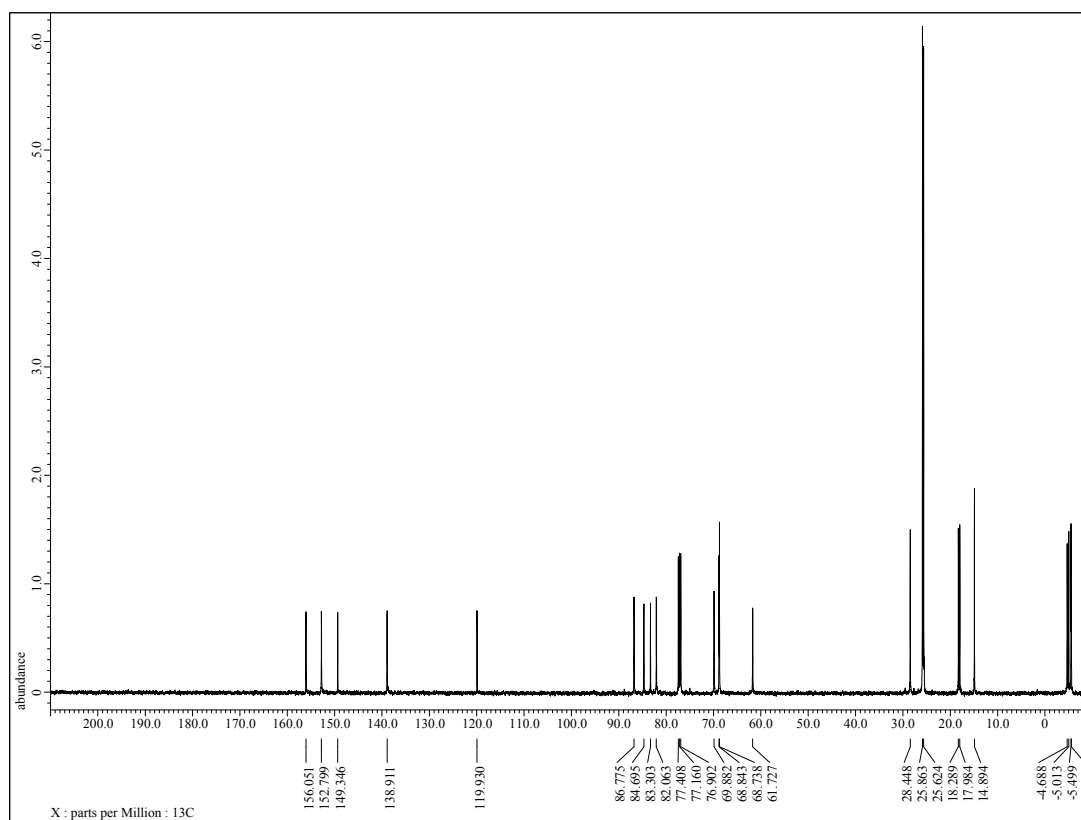

$^1\text{H-NMR}$  (500 MHz) and  $^{13}\text{C-NMR}$  (125 MHz) spectra of **S4** in  $\text{CDCl}_3$

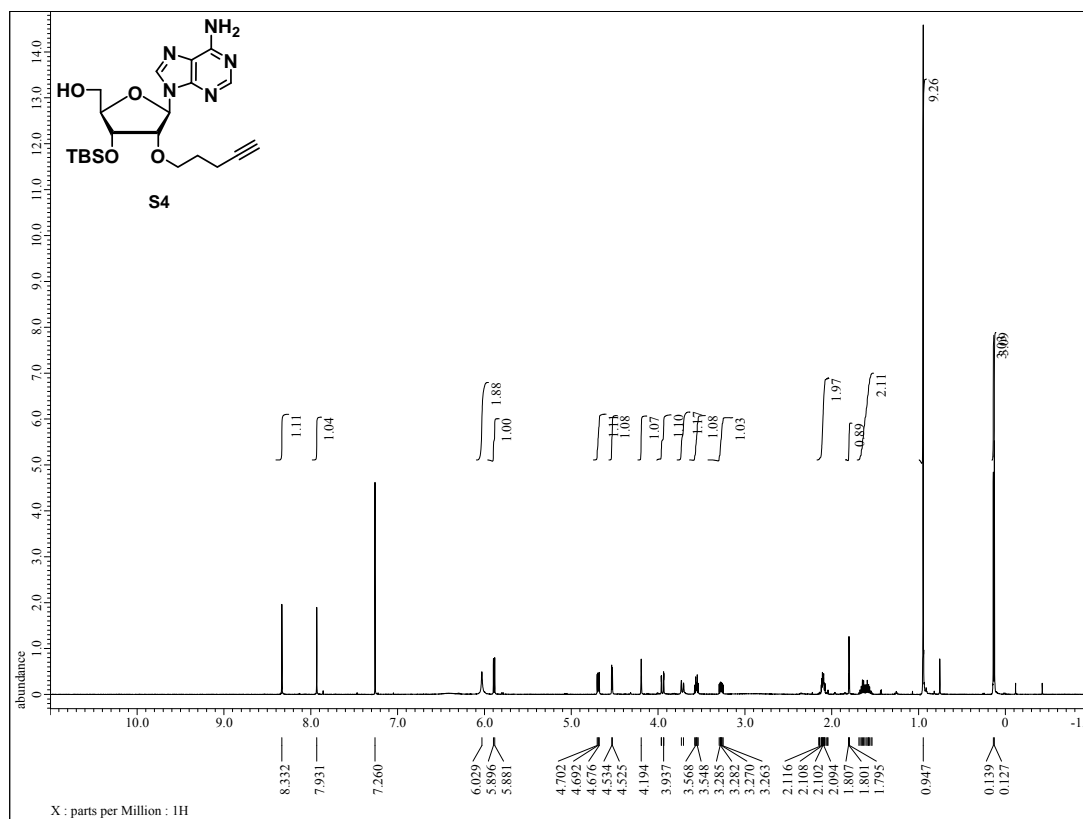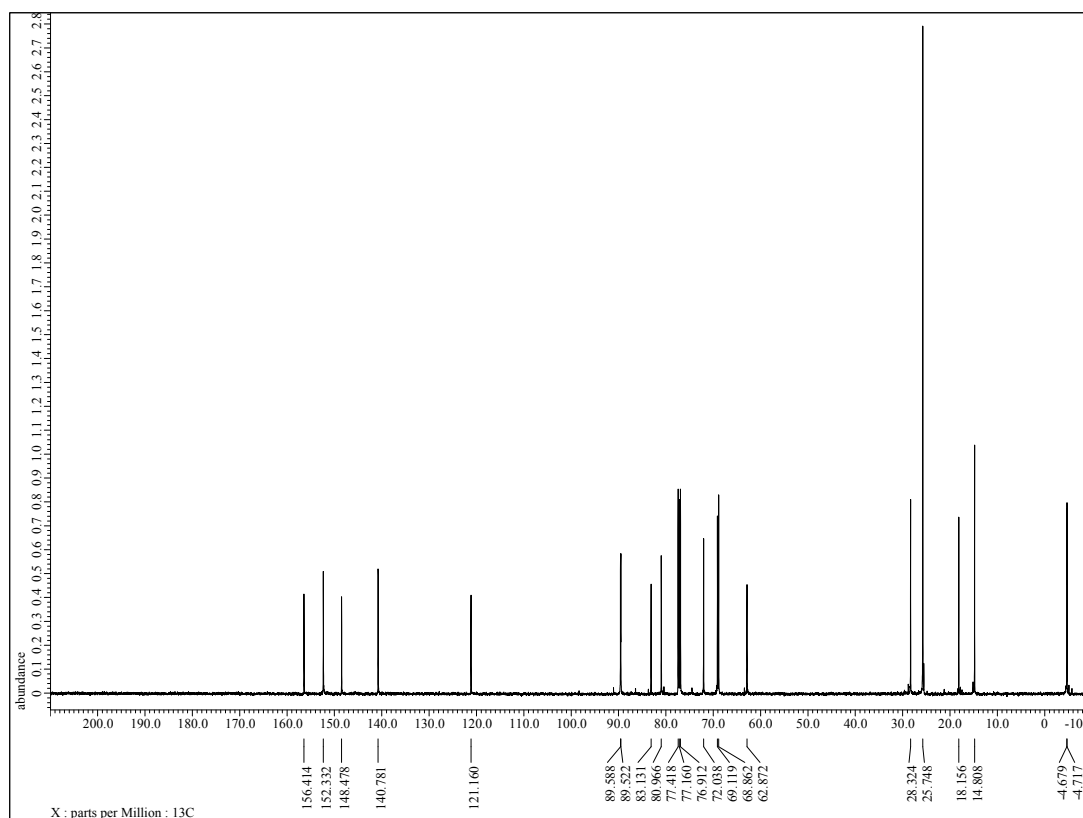

$^1\text{H-NMR}$  (500 MHz) and  $^{13}\text{C-NMR}$  (125 MHz) spectra of **S7** in  $\text{CDCl}_3$

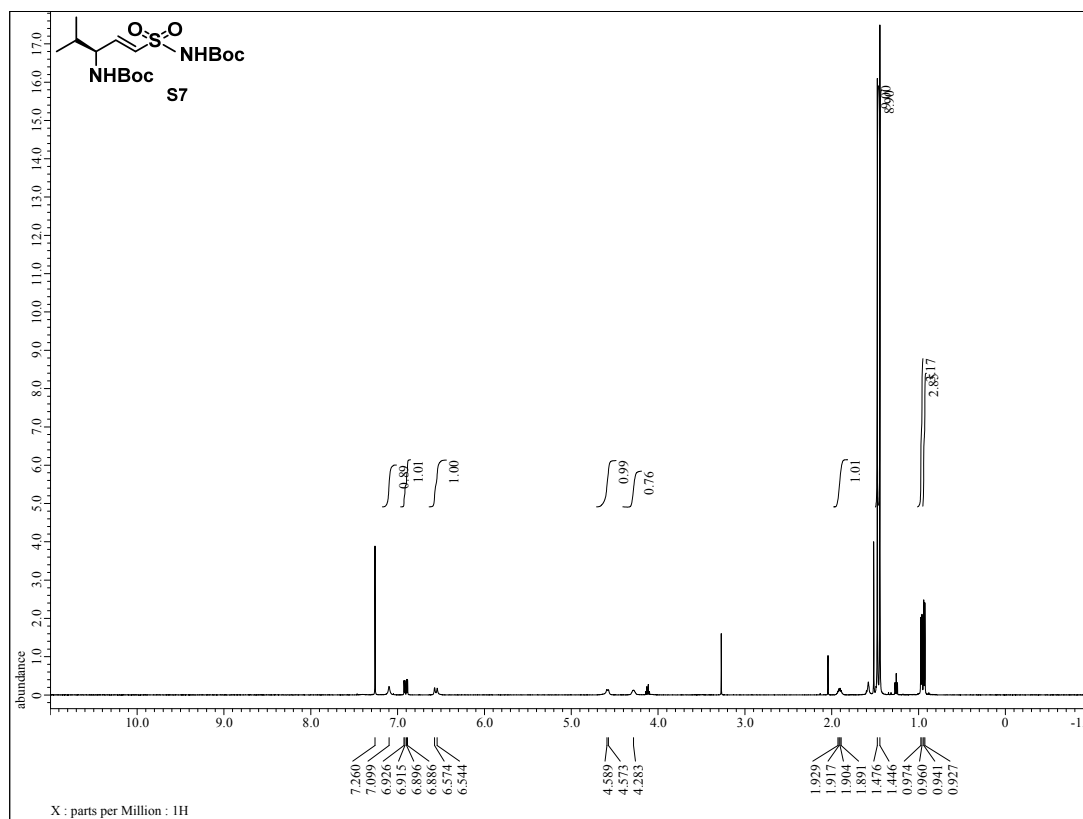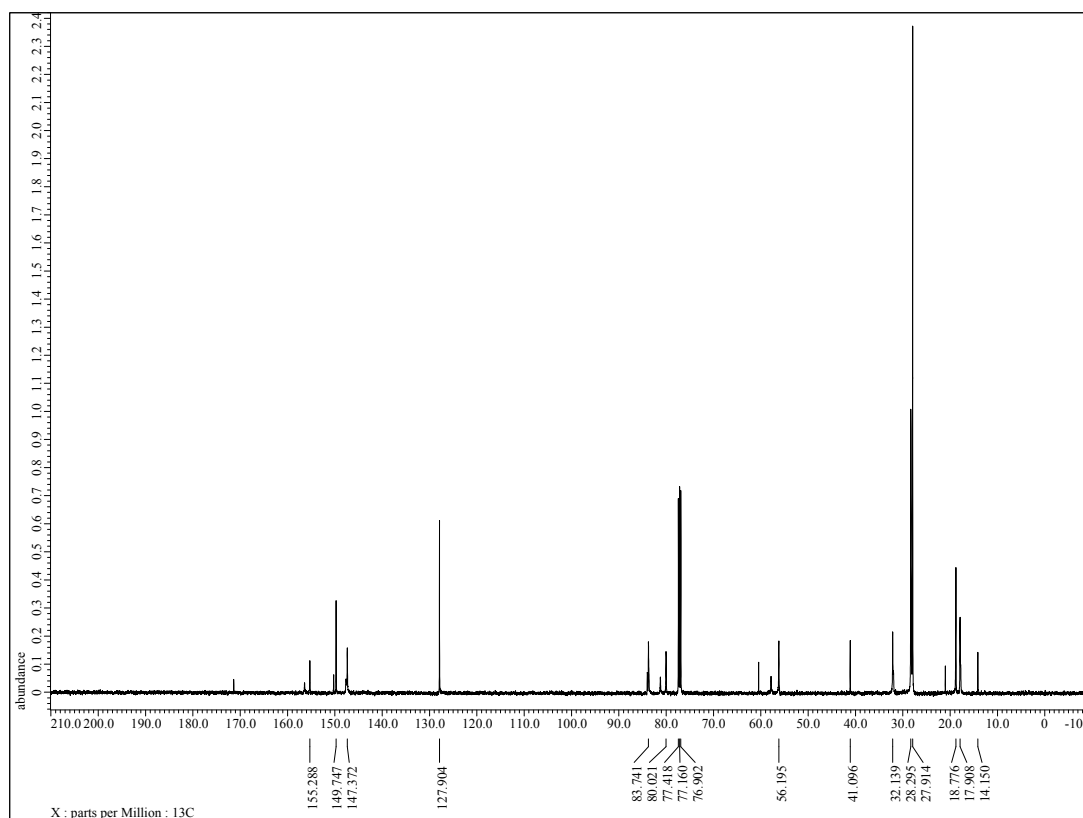

$^1\text{H-NMR}$  (500 MHz) and  $^{13}\text{C-NMR}$  (125 MHz) spectra of **S8** in  $\text{CDCl}_3$

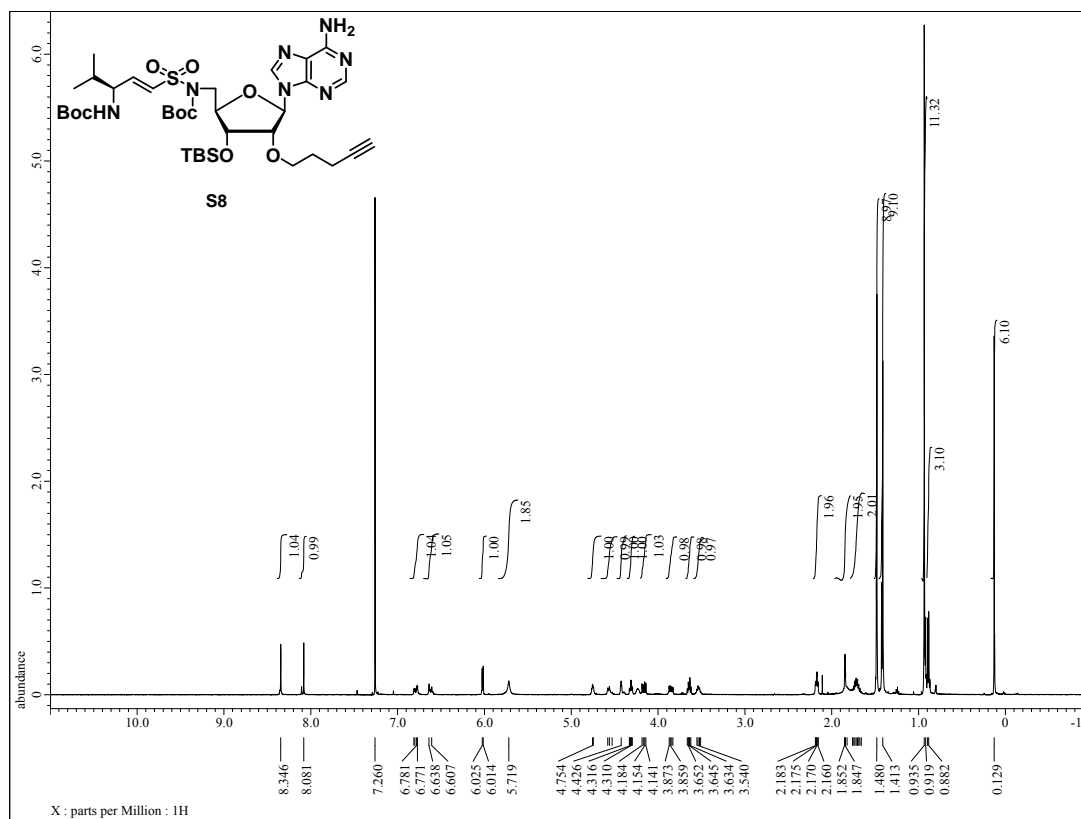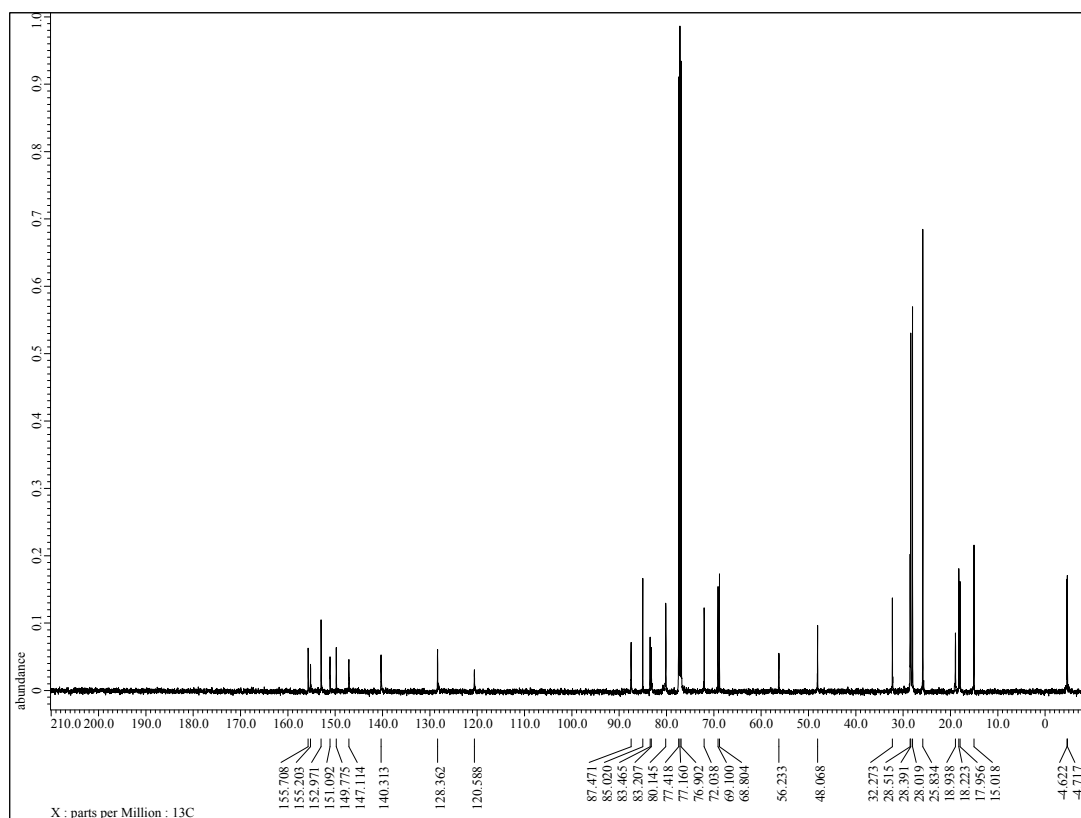

$^1\text{H-NMR}$  (500 MHz) and  $^{13}\text{C-NMR}$  (125 MHz) spectra of **1** in  $\text{CD}_3\text{OD}$

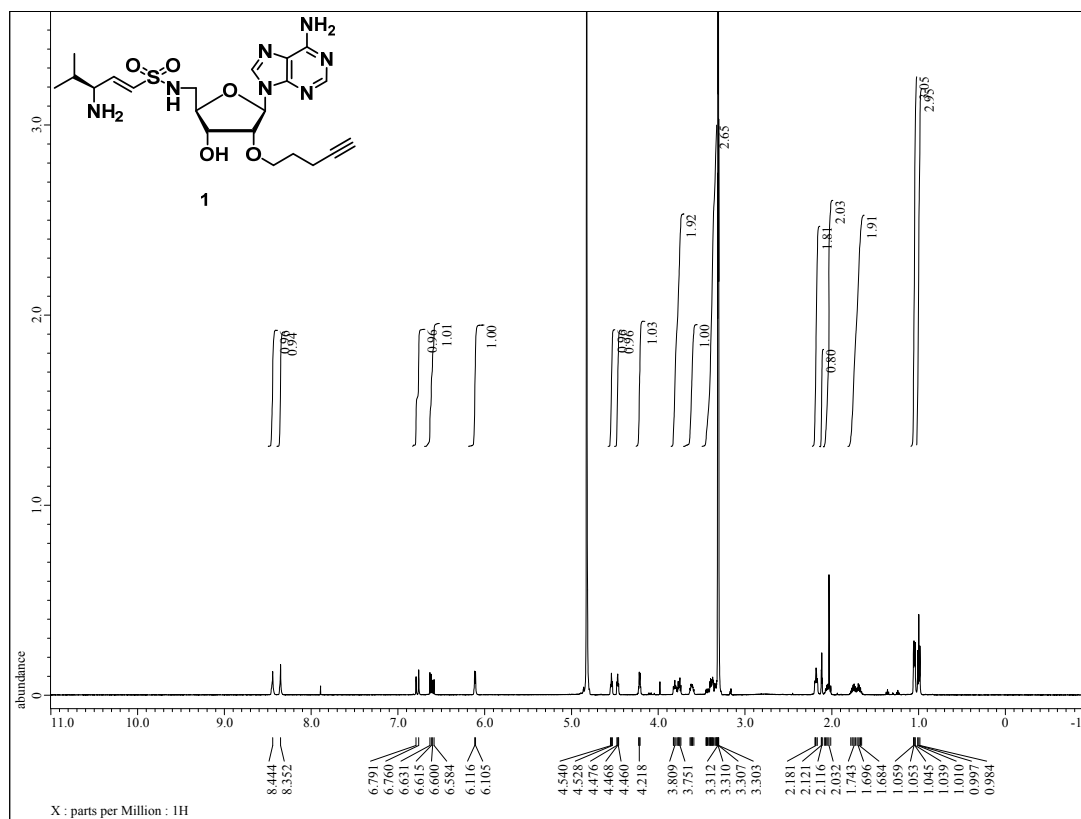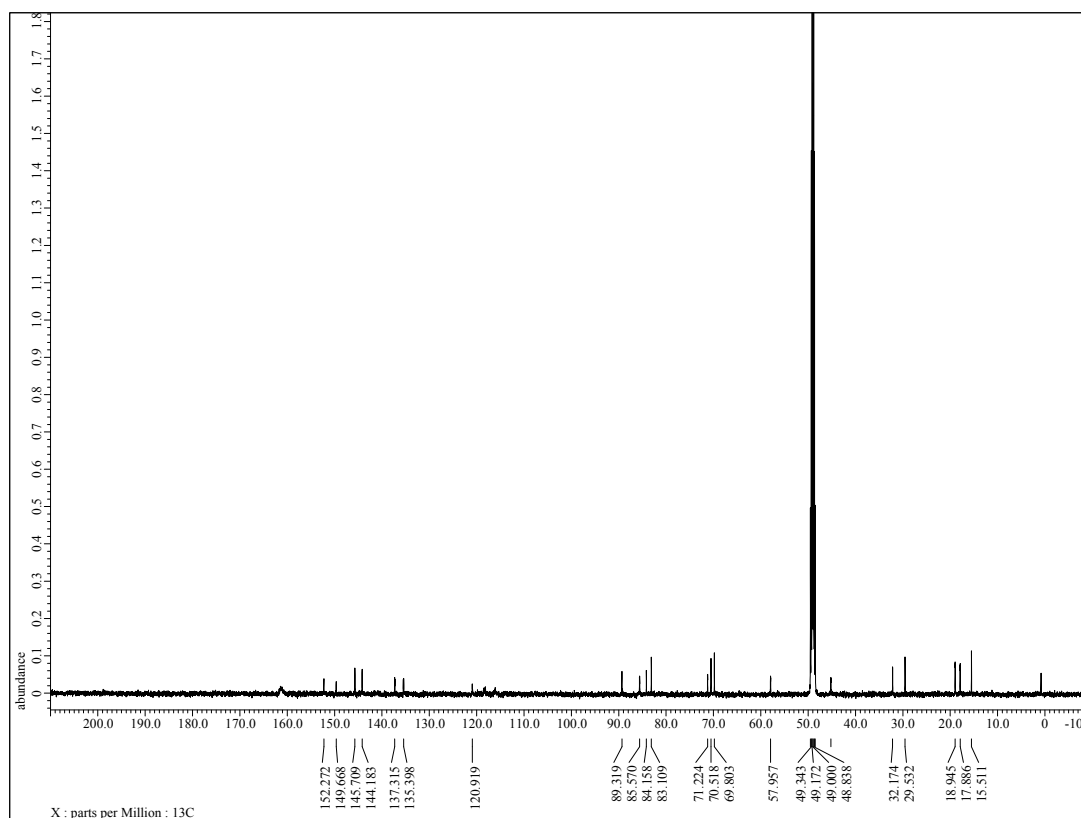

$^1\text{H-NMR}$  (500 MHz) and  $^{13}\text{C-NMR}$  (125 MHz) spectra of **S11** in  $\text{CDCl}_3$

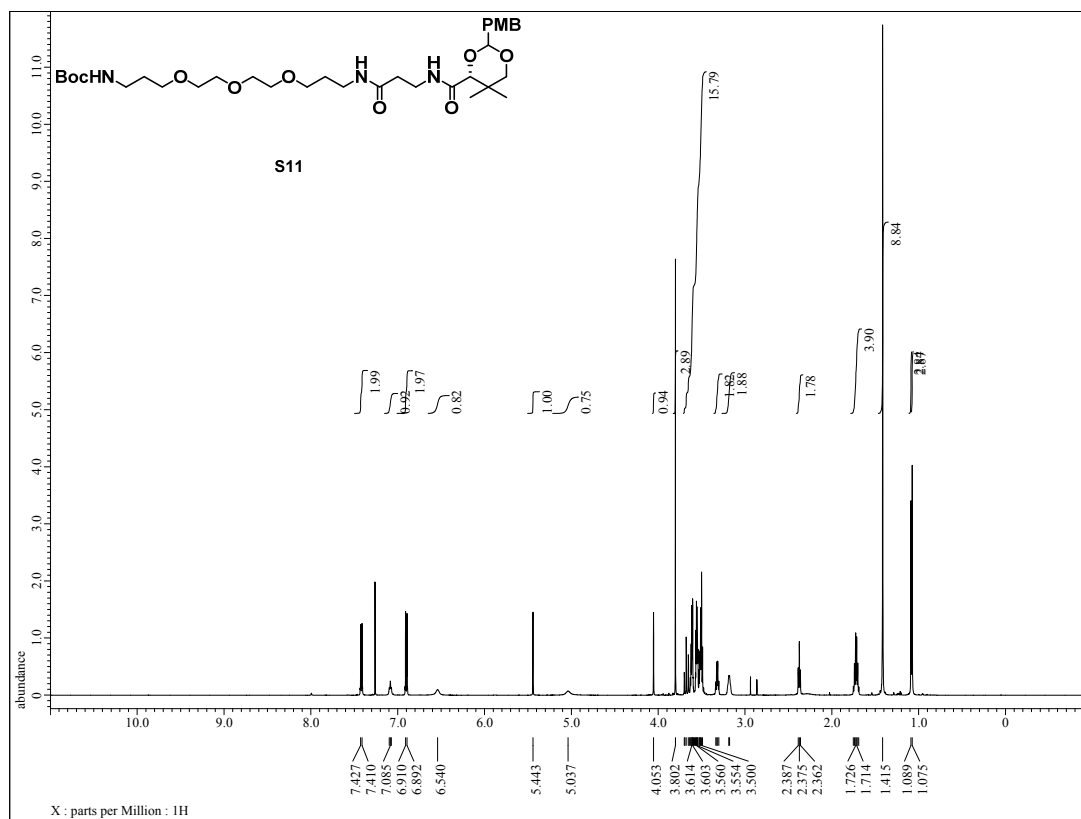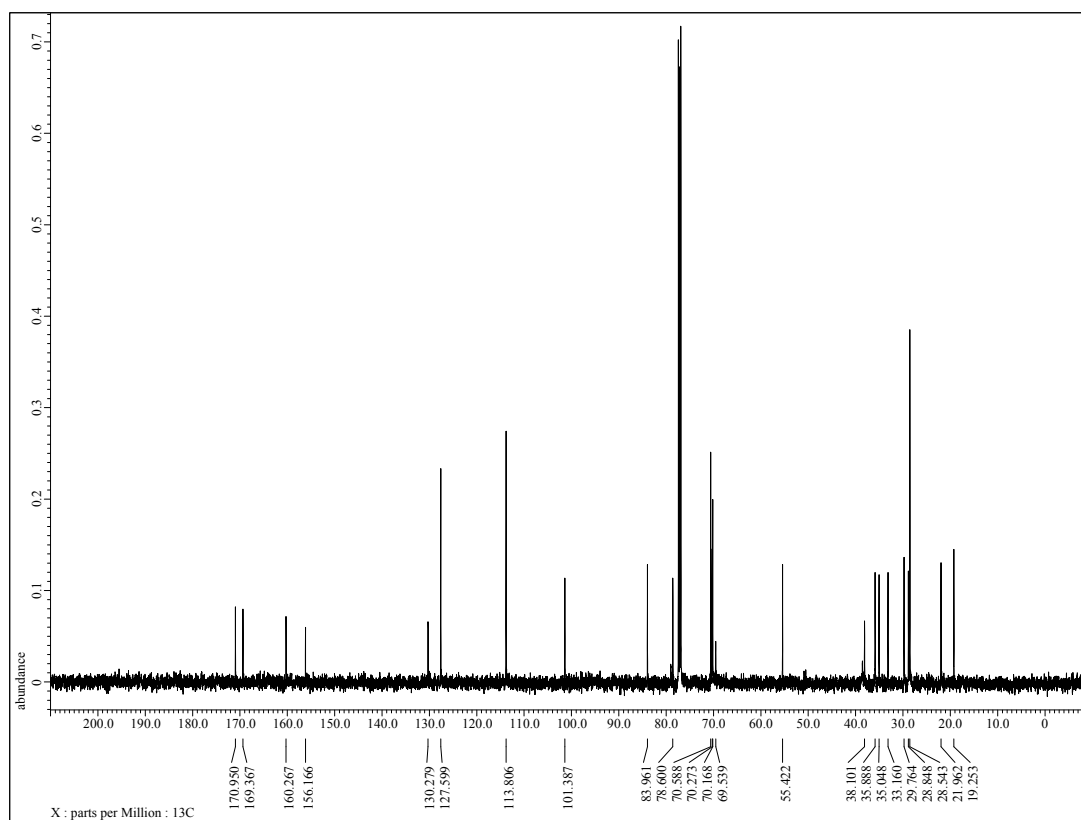



<sup>1</sup>H-NMR (500 MHz) spectrum of **S12** in D<sub>2</sub>O

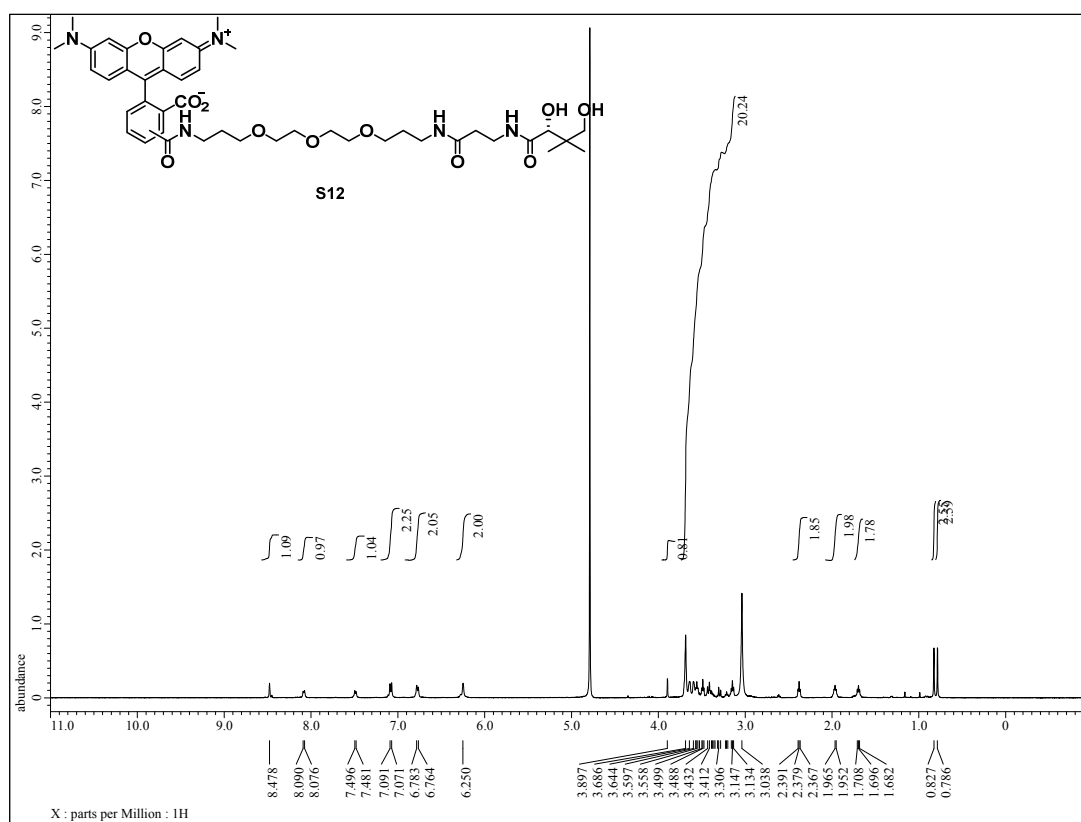

Supplement: c6cc07793e2.pdf [file c6cc07793e2.pdf]
