# Supplementary material for: A chemical proteomic probe for detecting native carrier protein motifs in nonribosomal peptide synthetases
Source: Royal Society of Chemistry journal article supplement (doi:10.1039/c6cc07793e), 2016-01-01
Supplement: c6cc07793e1.pdf [file c6cc07793e1.pdf]

Figure S15. MASCOT report for MS/MS analysis of gel excised fluorescent SrfAB bands from the *B. subtilis* ATCC 21332 proteome.

Database : NCBIr 20151028 (73478315 sequences; 2674620744 residues)  
 Taxonomy : *Bacillus subtilis* (127736 sequences)  
 Enzyme : Trypsin  
 Variable modifications : Deamidated (NQ),Gln->pyro-Glu (N-term Q),Oxidation (M),Acetyl (Protein N-term),Propionamide (C)  
 Mass values : Monoisotopic  
 Protein Mass : Unrestricted  
 Peptide Mass Tolerance : ± 15 ppm  
 Fragment Mass Tolerance : ± 20 mmu  
 Max Missed Cleavages : 3  
 Instrument type : ESI-TRAP  
 Number of queries : 10418

Protein hits [g|740641903](#) non-ribosomal peptide synthetase [Bacillus subtilis]  
 1. [g|740641903](#) [Mass: 409579](#) [Score: 26597](#) [Matches: 675\(675\)](#) [Sequences: 257\(257\)](#) [emPAL\\_34.23](#)  
 non-ribosomal peptide synthetase [Bacillus subtilis]

| Query                | Observed | Mr(exp)   | Mr(calc)  | ppm   | Miss | Score | Expect   | Rank | Unique | Peptide                              |
|----------------------|----------|-----------|-----------|-------|------|-------|----------|------|--------|--------------------------------------|
| <a href="#">47</a>   | 314.7051 | 627.3657  | 627.3656  | 0.18  | 0    | 30    | 0.014    | 1    |        | R.TGFLIKA                            |
| <a href="#">328</a>  | 381.7002 | 761.3658  | 761.3654  | 0.50  | 0    | 34    | 0.044    | 1    |        | K.GGQMASRL                           |
| <a href="#">337</a>  | 383.7082 | 766.4018  | 766.4021  | -0.41 | 0    | 37    | 0.018    | 1    |        | R.SYDILRT                            |
| <a href="#">362</a>  | 389.2186 | 776.4186  | 776.4181  | 0.61  | 0    | 38    | 0.036    | 1    |        | R.QGFINLAKD                          |
| <a href="#">378</a>  | 395.2214 | 786.4263  | 786.4280  | 0.39  | 0    | 41    | 0.018    | 1    |        | K.IETLLDAKQ                          |
| <a href="#">412</a>  | 401.2449 | 800.4763  | 800.4756  | -0.35 | 0    | 36    | 0.044    | 1    |        | K.QTGAQKS                            |
| <a href="#">415</a>  | 401.7386 | 801.4697  | 801.4696  | -1.14 | 0    | 37    | 0.022    | 1    |        | R.VLLTGQDKL                          |
| <a href="#">536</a>  | 414.7832 | 827.5116  | 827.5116  | 0.20  | 0    | 45    | 0.0021   | 1    |        | R.LVLGGEKLI                          |
| <a href="#">562</a>  | 416.7400 | 829.4656  | 829.4657  | -0.31 | 0    | 40    | 0.018    | 1    |        | K.SVNELIRLS                          |
| <a href="#">572</a>  | 417.7289 | 833.4393  | 833.4395  | -0.28 | 0    | 38    | 0.034    | 1    |        | K.FAVNLERLN                          |
| <a href="#">576</a>  | 417.7482 | 833.4769  | 833.4759  | -0.08 | 0    | 34    | 0.046    | 1    |        | K.GVGYGLIRY                          |
| <a href="#">579</a>  | 418.2282 | 834.4369  | 834.4388  | -3.52 | 0    | 43    | 0.005    | 1    |        | K.QFAAFRLRE                          |
| <a href="#">582</a>  | 419.7302 | 837.4458  | 837.4457  | 0.18  | 0    | (40)  | 0.0071   | 1    |        | <a href="#">K.GVQIEHRN 581</a>       |
| <a href="#">585</a>  | 420.2224 | 838.4302  | 838.4297  | 0.60  | 0    | 43    | 0.0042   | 1    |        | K.GVQIEHRLN                          |
| <a href="#">588</a>  | 420.7449 | 839.4752  | 839.4753  | -0.09 | 0    | 33    | 0.024    | 1    |        | K.KALPVPDKT                          |
| <a href="#">637</a>  | 424.7197 | 847.4189  | 847.4186  | 0.07  | 1    | 35    | 0.042    | 1    |        | K.KGFDPRLV                           |
| <a href="#">651</a>  | 426.7401 | 851.4657  | 851.4654  | 0.43  | 0    | (39)  | 0.0087   | 1    |        | K.QFAARLRE                           |
| <a href="#">667</a>  | 429.7263 | 857.4369  | 857.4365  | 0.54  | 0    | 38    | 0.0087   | 1    |        | R.ELNAAANRL 655 666                  |
| <a href="#">692</a>  | 436.7456 | 871.4798  | 871.4793  | 0.51  | 0    | 50    | 0.001    | 1    | U      | R.EVAVGELRK                          |
| <a href="#">724</a>  | 442.2416 | 882.4697  | 882.4671  | 1.74  | 0    | 35    | 0.016    | 1    |        | K.AAAAANPVRLL                        |
| <a href="#">846</a>  | 459.2887 | 916.5229  | 916.5229  | -0.12 | 1    | 58    | 0.00019  | 1    |        | K.IKETLLDAKQ                         |
| <a href="#">865</a>  | 461.7407 | 921.4698  | 921.4696  | -0.05 | 1    | 40    | 0.011    | 1    |        | R.QKEHERLY                           |
| <a href="#">902</a>  | 468.2843 | 930.5140  | 930.5134  | 0.62  | 0    | 57    | 0.00037  | 1    |        | K.LQSSDLRLT                          |
| <a href="#">919</a>  | 312.8349 | 935.4828  | 935.4825  | 0.34  | 1    | 41    | 0.011    | 1    |        | R.YKQDQVRLQ                          |
| <a href="#">965</a>  | 472.7819 | 943.8092  | 943.8097  | 0.60  | 1    | 71    | 1.2e-005 | 1    |        | R.ADDQVGRG                           |
| <a href="#">982</a>  | 478.2303 | 950.4490  | 950.4487  | 0.24  | 0    | 41    | 0.008    | 1    |        | K.DANFESRLI                          |
| <a href="#">990</a>  | 478.7481 | 951.4816  | 951.4814  | 0.22  | 0    | 40    | 0.0089   | 1    |        | K.WSEYVRLI                           |
| <a href="#">1006</a> | 479.2799 | 956.5453  | 956.5443  | 1.05  | 0    | 41    | 0.0043   | 1    |        | K.QALLQWKQ                           |
| <a href="#">1038</a> | 482.7843 | 963.5141  | 963.5136  | 0.38  | 0    | 68    | 2e-005   | 1    |        | K.AGQNLTYRLE                         |
| <a href="#">1049</a> | 484.2377 | 966.4609  | 966.4593  | 1.68  | 0    | (47)  | 0.0018   | 1    |        | K.DAGMFGTLRLH                        |
| <a href="#">1052</a> | 485.2296 | 968.4445  | 968.4451  | -0.54 | 0    | 30    | 0.046    | 1    |        | R.YLSDSGAKF                          |
| <a href="#">1068</a> | 486.2856 | 970.5666  | 970.5680  | 0.80  | 1    | 37    | 0.018    | 1    |        | R.IDNQVQVRLG                         |
| <a href="#">1111</a> | 492.2344 | 982.4642  | 982.4642  | -0.02 | 0    | 48    | 0.0011   | 1    |        | <a href="#">K.DAGMFGTLRLH 1112</a>   |
| <a href="#">1201</a> | 801.2942 | 1000.6739 | 1000.6739 | 0.05  | 0    | (38)  | 0.017    | 1    |        | K.ENLLMLRLH                          |
| <a href="#">1254</a> | 338.8697 | 1013.6872 | 1013.6898 | 0.32  | 1    | (35)  | 0.087    | 1    |        | K.LVQLEKRLH                          |
| <a href="#">1255</a> | 807.8006 | 1013.6873 | 1013.6898 | 0.39  | 1    | 45    | 0.0035   | 1    |        | K.LVQLEKRLH                          |
| <a href="#">1263</a> | 806.2919 | 1016.6993 | 1016.6988 | 0.48  | 0    | 38    | 0.017    | 1    |        | K.ENLLMLRLH                          |
| <a href="#">1315</a> | 516.2849 | 1030.5553 | 1030.5546 | 0.64  | 0    | 45    | 0.0055   | 1    |        | R.IELGIEIYKL                         |
| <a href="#">1343</a> | 821.2374 | 1040.4803 | 1040.4897 | 0.80  | 0    | 42    | 0.0044   | 1    |        | R.FMAEDSSVRLM                        |
| <a href="#">1353</a> | 821.8186 | 1041.8186 | 1041.8182 | 0.39  | 1    | 53    | 0.00036  | 1    |        | R.KLVQGLQKGG                         |
| <a href="#">1360</a> | 822.3273 | 1042.6400 | 1042.6398 | 1.29  | 1    | 34    | 0.03     | 1    |        | R.VLLTGQDKLKR                        |
| <a href="#">1409</a> | 829.2349 | 1066.4653 | 1066.4646 | 0.65  | 0    | (34)  | 0.018    | 1    |        | R.FMAEDSSVRLM                        |
| <a href="#">1416</a> | 829.7835 | 1057.5523 | 1057.5516 | 0.70  | 0    | 52    | 0.00073  | 1    |        | R.DSLNQLVNRH                         |
| <a href="#">1432</a> | 830.7934 | 1059.5722 | 1059.5713 | 0.91  | 0    | 41    | 0.011    | 1    |        | K.ALFEQPTVRLQ                        |
| <a href="#">1450</a> | 355.8690 | 1084.5732 | 1084.5727 | 0.52  | 0    | 37    | 0.018    | 1    |        | K.IGINLEHGRL                         |
| <a href="#">1473</a> | 837.3136 | 1072.6124 | 1072.6126 | -0.38 | 1    | 50    | 0.0013   | 1    |        | R.SKLVLEKRLH                         |
| <a href="#">1478</a> | 838.2810 | 1074.6074 | 1074.6080 | -0.57 | 0    | 62    | 6.3e-006 | 1    |        | R.EEDAEIYK                           |
| <a href="#">1480</a> | 359.1877 | 1074.5411 | 1074.5416 | -0.60 | 0    | (41)  | 0.011    | 1    |        | K.EPSSISGSLRN                        |
| <a href="#">1481</a> | 838.2796 | 1074.5427 | 1074.5416 | 0.88  | 0    | 44    | 0.008    | 1    |        | K.EPSSISGSLRN                        |
| <a href="#">1492</a> | 839.2536 | 1076.4925 | 1076.4920 | 0.46  | 0    | 71    | 6.9e-008 | 1    |        | K.GETAAMNDRLS                        |
| <a href="#">1528</a> | 544.3095 | 1086.8045 | 1086.8033 | 1.04  | 0    | 56    | 0.00034  | 1    |        | R.DVMSYTAGRT                         |
| <a href="#">1534</a> | 545.2599 | 1088.5033 | 1088.5026 | 0.62  | 0    | 44    | 0.0022   | 1    |        | R.YFTEIATKQ                          |
| <a href="#">1545</a> | 546.7835 | 1091.4925 | 1091.4917 | 0.78  | 0    | 70    | 5.8e-008 | 1    |        | R.ATVTEQMERF                         |
| <a href="#">1547</a> | 547.2510 | 1092.4875 | 1092.4870 | 0.63  | 0    | (44)  | 0.0022   | 1    |        | K.GETAAMNDRLS                        |
| <a href="#">1608</a> | 854.7509 | 1107.4871 | 1107.4896 | 0.48  | 0    | (48)  | 0.001    | 1    |        | R.ATVTEQMERF 1609 1610               |
| <a href="#">1659</a> | 560.8036 | 1119.8927 | 1119.8924 | 0.32  | 0    | 39    | 0.018    | 1    |        | K.NISFLEAKQ                          |
| <a href="#">1746</a> | 572.8402 | 1143.8659 | 1143.8652 | 0.69  | 0    | 47    | 0.002    | 1    |        | <a href="#">K.IFDIYAFERK 1748</a>    |
| <a href="#">1762</a> | 574.7831 | 1147.8517 | 1147.8509 | 0.69  | 0    | 51    | 0.00089  | 1    |        | K.EEOTFERRQ                          |
| <a href="#">1768</a> | 575.3174 | 1148.8203 | 1148.8190 | 1.18  | 0    | 78    | 3.8e-008 | 1    |        | <a href="#">R.LSDGTLAFGR 1768</a>    |
| <a href="#">1775</a> | 576.2976 | 1150.5905 | 1150.5905 | 0.08  | 0    | 55    | 0.00032  | 1    |        | R.MYLNQLDRQ                          |
| <a href="#">1827</a> | 582.6169 | 1163.6162 | 1163.6166 | 0.61  | 0    | 67    | 3e-005   | 1    |        | R.QVYFVNSTKA                         |
| <a href="#">1863</a> | 586.8063 | 1177.5960 | 1177.5979 | 0.09  | 0    | 57    | 0.00028  | 1    |        | K.FDLSLEAVLE                         |
| <a href="#">1926</a> | 400.5876 | 1198.7409 | 1198.7397 | 1.00  | 2    | 49    | 0.00088  | 1    |        | R.VLLTGQDKLKR                        |
| <a href="#">1975</a> | 804.8072 | 1207.5999 | 1207.5998 | 1.14  | 0    | 78    | 3.4e-008 | 1    |        | K.WTGGIEYGRLI                        |
| <a href="#">2023</a> | 810.8251 | 1219.6396 | 1219.6348 | 0.82  | 0    | 47    | 0.0028   | 1    |        | K.AFPVPELNR                          |
| <a href="#">2071</a> | 308.1866 | 1228.7136 | 1228.7136 | -0.38 | 2    | (33)  | 0.047    | 1    |        | R.SKLVLEKRLH                         |
| <a href="#">2072</a> | 410.6785 | 1228.7136 | 1228.7136 | -0.21 | 2    | (52)  | 0.0008   | 1    |        | R.SKLVLEKRLH                         |
| <a href="#">2073</a> | 815.3643 | 1228.7141 | 1228.7139 | 0.15  | 2    | 65    | 3.3e-005 | 1    |        | R.SKLVLEKRLH                         |
| <a href="#">2088</a> | 817.3177 | 1232.6206 | 1232.6190 | 1.49  | 0    | 61    | 0.00011  | 1    |        | R.FVADFPVGERLM                       |
| <a href="#">2103</a> | 818.3117 | 1234.6089 | 1234.6082 | 0.68  | 0    | 59    | 0.00018  | 1    |        | R.VDLSDDPTVVKR                       |
| <a href="#">2109</a> | 818.8273 | 1235.6401 | 1235.6397 | 0.30  | 0    | 62    | 0.00012  | 1    |        | R.IEVLQDSGAKL                        |
| <a href="#">2119</a> | 413.5506 | 1237.6301 | 1237.6302 | -0.14 | 1    | (42)  | 0.008    | 1    |        | R.IRYLSDSGAKF                        |
| <a href="#">2120</a> | 819.8231 | 1237.6316 | 1237.6302 | 1.08  | 1    | 53    | 0.00065  | 1    |        | R.IRYLSDSGAKF                        |
| <a href="#">2132</a> | 820.8200 | 1239.6255 | 1239.6246 | 0.57  | 0    | 49    | 0.0016   | 1    |        | K.SLFQYEAURL                         |
| <a href="#">2238</a> | 829.3271 | 1266.6397 | 1266.6401 | -0.27 | 0    | 45    | 0.0038   | 1    |        | K.AEVDLHFEAKE                        |
| <a href="#">2265</a> | 831.8343 | 1281.6541 | 1281.6554 | -0.99 | 0    | 56    | 0.00049  | 1    |        | R.GYVNLPELTKQ                        |
| <a href="#">2328</a> | 836.8889 | 1271.7692 | 1271.7601 | -0.71 | 1    | 37    | 0.0086   | 1    |        | K.IIFDVLAFRKM                        |
| <a href="#">2349</a> | 838.3676 | 1274.7004 | 1274.6983 | 1.69  | 1    | 58    | 0.00021  | 1    |        | R.TGPLLKAQYRLT                       |
| <a href="#">2359</a> | 428.2530 | 1275.7371 | 1275.7373 | -0.17 | 1    | (34)  | 0.027    | 1    |        | R.FKFNLLMLRH                         |
| <a href="#">2360</a> | 838.8782 | 1275.7378 | 1275.7373 | 0.59  | 1    | (49)  | 0.00095  | 1    |        | R.FKFNLLMLRH                         |
| <a href="#">2382</a> | 842.2998 | 1282.5850 | 1282.5893 | -1.00 | 0    | 35    | 0.028    | 1    |        | K.QDMYPLSBAQKR                       |
| <a href="#">2418</a> | 429.9181 | 1286.7324 | 1286.7347 | -1.80 | 1    | 53    | 0.0008   | 1    |        | <a href="#">R.IPDKGVGYGLIRY 2419</a> |
| <a href="#">2422</a> | 944.3781 | 1286.7378 | 1286.7347 | 2.32  | 1    | (45)  | 0.0035   | 1    |        | R.IPDKGVGYGLIRY                      |
| <a href="#">2425</a> | 944.8226 | 1287.6311 | 1287.6306 | 0.35  | 1    | 50    | 0.0014   | 1    |        | K.GREEDAEIYK                         |
| <a href="#">2446</a> | 846.8739 | 1291.7332 | 1291.7322 | 0.82  | 1    | (43)  | 0.003    | 1    |        | R.FKFNLLMLRH                         |
| <a href="#">2449</a> | 431.5853 | 1291.7340 | 1291.7322 | 1.38  | 1    | 51    | 0.00048  | 1    |        | R.FKFNLLMLRH                         |
| <a href="#">2462</a> | 847.7969 | 1293.6940 | 1293.6937 | 0.21  | 0    | 80    | 7.8e-007 | 1    |        | R.EYVLVQDSGRQ 2463 2464              |
| <a href="#">2467</a> | 848.5182 | 1294.6237 | 1294.6153 | 6.82  | 1    | 59    | 0.00017  | 1    |        | R.GYVNLREDETRK                       |
| <a href="#">2531</a> | 435.9141 | 1304.7204 | 1304.7201 | 0.21  | 1    | (37)  | 0.025    | 1    |        | R.RLSDGTLAFGR                        |
| <a href="#">2533</a> | 853.8683 | 1304.7220 | 1304.7201 | 1.49  | 1    | 58    | 0.00018  | 1    |        | R.RLSDGTLAFGR                        |
| <a href="#">2557</a> | 855.8300 | 1306.6454 | 1306.6449 | 0.39  | 1    | (50)  | 0.0015   | 1    |        | R.LRFMAEDSSVRLM                      |
| <a href="#">2568</a> | 856.3736 | 1310.7324 | 1310.7306 | 1.36  | 0    | 45    | 0.0019   | 1    |        | R.LENAQQLNRLH                        |
| <a href="#">2654</a> | 442.8873 | 1325.6400 | 1325.6398 | 1.16  | 1    | (41)  | 0.0088   | 1    |        | R.LRFMAEDSSVRLM                      |
| <a href="#">2655</a> | 863.8273 | 1325.6401 | 1325.6398 | 0.25  | 1    | 68    | 2.9e-005 | 1    |        | R.LRFMAEDSSVRLM                      |
| <a href="#">2659</a> | 864.3752 | 1326.7359 | 1326.7368 | -0.64 | 1    | 49    | 0.0011   | 1    |        | R.LRDSLNLQVNRH                       |
| <a href="#">2660</a> | 443.2833 | 1326.7362 | 1326.7368 | 1.05  | 1    | (35)  | 0.03     | 1    |        | R.LRDSLNLQVNRH                       |
| <a href="#">2682</a> | 444.9224 | 1331.7454 | 1331.7449 | 0.42  | 2    | 40    | 0.011    | 1    |        | R.LPQWQDEYVYK                        |
| <a href="#">2750</a> | 873.3820 | 1344.7894 | 1344.7887 | 0.53  | 0    | 80    | 9.4e-007 | 1    |        | <a href="#">R.SVYVYVGMIAVLA 2748</a> |
| <a href="#">2770</a> | 876.3205 | 1348.8264 | 1348.8259 | 0.41  | 0    | 80    | 1.1e-008 | 1    |        | <a href="#">K.NAGYVYVTEEDRM 2773</a> |
| <a href="#">2782</a> | 876.8124 | 1349.8103 | 1349.8099 | 0.31  | 0    | (65)  | 3.1e-005 | 1    |        | K.NAGYVYVTEEDRM                      |
| <a href="#">2797</a> | 451.5809 | 1351.7209 | 1351.7208 | 0.07  | 0    | (49)  | 0.0018   | 1    |        | R.NALPKPNAQSGGKA                     |
| <a href="#">2799</a> | 876.8679 | 1351.7212 | 1351.7208 | 0.29  | 0    |       |          |      |        |                                      |

|      |          |           |           |       |   |      |          |   |                                                  |
|------|----------|-----------|-----------|-------|---|------|----------|---|--------------------------------------------------|
| 2806 | 451.0088 | 1382.7047 | 1382.7046 | -0.07 | 0 | (49) | 0.0017   | 1 | R.NALPKPNAAGSQGK A 2805                          |
| 2812 | 452.5844 | 1354.7613 | 1354.7609 | 0.35  | 0 | (47) | 0.0017   | 1 | K.LAEWEGLGVRA                                    |
| 2813 | 678.3890 | 1354.7614 | 1354.7606 | 0.43  | 0 | 75   | 3e-008   | 1 | K.LAEWEGLGVRA 2811 2814                          |
| 2837 | 454.5949 | 1380.7827 | 1380.7836 | -0.64 | 0 | (45) | 0.0039   | 1 | R.SVETVYGLMLAVJKA                                |
| 2838 | 861.3895 | 1380.7645 | 1380.7836 | 0.67  | 0 | (54) | 4.3e-005 | 1 | R.SVETVYGLMLAVJKA                                |
| 2851 | 882.3711 | 1382.7277 | 1382.7251 | 1.88  | 0 | (88) | 3.7e-005 | 1 | R.SAEVMVSLGVMLKA                                 |
| 2881 | 885.8795 | 1389.7364 | 1389.7354 | 0.75  | 0 | 88   | 1.8e-005 | 1 | R.LAGFOPSVLPGRLL                                 |
| 2889 | 458.2396 | 1371.8989 | 1371.8999 | 0.04  | 0 | (41) | 0.01     | 1 | K.ISSYMLHVVAKF                                   |
| 2900 | 888.8590 | 1371.8975 | 1371.8989 | 0.44  | 0 | (48) | 0.0022   | 1 | K.ISSYMLHVVAKF                                   |
| 2936 | 480.5806 | 1378.7199 | 1378.7200 | -0.09 | 0 | (37) | 0.034    | 1 | R.SAEVMVSLGVMLKA                                 |
| 2937 | 890.3690 | 1378.7214 | 1378.7200 | 1.02  | 0 | 87   | 3e-005   | 1 | R.SAEVMVSLGVMLKA                                 |
| 2938 | 890.3682 | 1378.7218 | 1378.7200 | 1.28  | 0 | (83) | 7.7e-005 | 1 | R.SAEVMVSLGVMLKA                                 |
| 2984 | 483.5713 | 1387.8920 | 1387.8918 | 0.17  | 0 | (48) | 0.0037   | 1 | K.ISSYMLHVVAKF                                   |
| 2985 | 894.8536 | 1387.8928 | 1387.8918 | 0.88  | 0 | 84   | 6.1e-007 | 1 | K.ISSYMLHVVAKF                                   |
| 2990 | 885.3670 | 1388.7213 | 1388.7201 | 0.88  | 1 | 48   | 0.0029   | 1 | K.RFVADFPVGRML                                   |
| 3002 | 464.5892 | 1390.7459 | 1390.7458 | 0.18  | 1 | 43   | 0.0072   | 1 | R.GFRIELGEITKL                                   |
| 3019 | 897.3896 | 1382.7786 | 1382.7786 | 0.05  | 1 | 59   | 8.1e-005 | 1 | R.QGFNLAKDILFKV                                  |
| 3020 | 465.2862 | 1382.7789 | 1382.7786 | 0.27  | 1 | (37) | 0.014    | 1 | R.QGFNLAKDILFKV                                  |
| 3032 | 465.9125 | 1394.7157 | 1394.7149 | 0.88  | 0 | (43) | 0.0082   | 1 | R.SAEVMVSLGVMLKA                                 |
| 3034 | 898.3862 | 1394.7158 | 1394.7149 | 0.86  | 0 | (89) | 0.00019  | 1 | R.SAEVMVSLGVMLKA                                 |
| 3049 | 700.3816 | 1386.7057 | 1386.7078 | 0.68  | 1 | 40   | 0.014    | 1 | R.LNQH9WLEJMKD                                   |
| 3152 | 708.8875 | 1415.7204 | 1415.7197 | 0.48  | 0 | 55   | 0.00061  | 1 | R.WLPDGNIEGLRLJ 3151 3153                        |
| 3167 | 708.8825 | 1417.7505 | 1417.7313 | 13.5  | 0 | 37   | 0.084    | 1 | R.GYLNRPQLTAERFL                                 |
| 3185 | 711.8355 | 1421.8893 | 1421.8609 | -3.20 | 0 | (39) | 0.011    | 1 | K.QDMLPLSAGKRLM                                  |
| 3224 | 716.8838 | 1429.7131 | 1429.7129 | 0.14  | 0 | 38   | 0.042    | 1 | R.YDYVPLYEIQRL                                   |
| 3280 | 720.3510 | 1438.8873 | 1438.8874 | -0.06 | 1 | (48) | 0.0019   | 1 | K.QDMLPLSAGKRLM                                  |
| 3281 | 480.5899 | 1438.8878 | 1438.8874 | 0.28  | 1 | 50   | 0.0013   | 1 | K.QDMLPLSAGKRLM                                  |
| 3306 | 722.4241 | 1442.8337 | 1442.8358 | -1.43 | 2 | (34) | 0.038    | 1 | R.RIPDKGVGYGILRY                                 |
| 3307 | 361.7180 | 1442.8349 | 1442.8358 | -0.81 | 2 | (35) | 0.025    | 1 | R.RIPDKGVGYGILRY                                 |
| 3308 | 481.9528 | 1442.8385 | 1442.8358 | 0.54  | 2 | 80   | 7.8e-005 | 1 | R.RIPDKGVGYGILRY                                 |
| 3338 | 728.3895 | 1450.7194 | 1450.7184 | 1.35  | 2 | 63   | 9.2e-005 | 1 | R.GYLNREDETAQRFL                                 |
| 3374 | 486.9181 | 1457.7288 | 1457.7283 | 0.21  | 0 | 85   | 4.9e-005 | 1 | K.TVHQLFEETAQRH                                  |
| 3375 | 729.8714 | 1457.7282 | 1457.7283 | 1.34  | 0 | (38) | 0.022    | 1 | K.TVHQLFEETAQRH                                  |
| 3386 | 730.8442 | 1459.8739 | 1459.8732 | 0.52  | 0 | 85   | 3.2e-007 | 1 | K.VYNGAADFARFERT                                 |
| 3410 | 733.3411 | 1464.8977 | 1464.8987 | 0.68  | 0 | (89) | 1.9e-005 | 1 | R.TSFMANGEPVQRI                                  |
| 3411 | 733.8322 | 1465.8499 | 1465.8507 | -0.59 | 0 | (54) | 0.00021  | 1 | R.TSFMANGEPVQRI                                  |
| 3438 | 490.9596 | 1489.8589 | 1489.8585 | 0.28  | 1 | (55) | 0.00019  | 1 | K.ILANKLGSSLDLRL                                 |
| 3437 | 735.9399 | 1489.8573 | 1489.8585 | 0.50  | 1 | 80   | 6.2e-007 | 1 | K.ILANKLGSSLDLRL                                 |
| 3475 | 494.2844 | 1479.8313 | 1479.8310 | 0.20  | 0 | (37) | 0.015    | 1 | R.TVYVHQLOKPRQ                                   |
| 3476 | 740.8232 | 1479.8319 | 1479.8310 | 0.57  | 0 | 51   | 0.00048  | 1 | R.TVYVHQLOKPRQ                                   |
| 3477 | 494.5808 | 1480.8608 | 1480.8618 | -0.68 | 0 | (47) | 0.0018   | 1 | R.TSFMANGEPVQRI                                  |
| 3478 | 741.3383 | 1480.8621 | 1480.8618 | 0.31  | 0 | 73   | 4.2e-006 | 1 | R.TSFMANGEPVQRI                                  |
| 3483 | 741.8351 | 1481.8658 | 1481.8648 | 6.72  | 0 | (48) | 0.0009   | 1 | R.TSFMANGEPVQRI                                  |
| 3497 | 485.2926 | 1482.8580 | 1482.8588 | 0.10  | 1 | 59   | 7.5e-005 | 1 | K.KLAEWEGLGVRA 3493 3500                         |
| 3498 | 742.4353 | 1482.8580 | 1482.8588 | 0.15  | 1 | (82) | 0.00043  | 1 | K.KLAEWEGLGVRA                                   |
| 3543 | 504.2582 | 1508.7488 | 1508.7483 | 0.30  | 1 | (82) | 0.00011  | 1 | K.ETAEKWSEYVRLI                                  |
| 3544 | 755.8812 | 1508.7478 | 1508.7483 | 0.96  | 1 | 84   | 9e-007   | 1 | K.ETAEKWSEYVRLI                                  |
| 3567 | 806.2790 | 1515.8151 | 1515.8158 | -0.40 | 0 | (58) | 0.0003   | 1 | K.TLQALIEHDALRLM 3672 3673                       |
| 3568 | 768.9152 | 1515.8159 | 1515.8158 | 0.09  | 0 | 79   | 2.4e-008 | 1 | K.TLQALIEHDALRLM                                 |
| 3670 | 379.9813 | 1515.8162 | 1515.8158 | 0.31  | 0 | (50) | 0.0015   | 1 | K.TLQALIEHDALRLM                                 |
| 3692 | 780.3300 | 1518.8465 | 1518.8448 | 0.38  | 0 | 87   | 7.4e-008 | 1 | K.TDFFPSAFDMGRQ                                  |
| 3778 | 767.8910 | 1533.7875 | 1533.7875 | 0.06  | 0 | 58   | 0.00087  | 1 | K.EQOITFAELLEQAQK                                |
| 3779 | 612.2836 | 1533.7888 | 1533.7875 | 0.89  | 0 | (51) | 0.0018   | 1 | K.EQOITFAELLEQAQK                                |
| 3782 | 768.3276 | 1534.8406 | 1534.8396 | 1.16  | 0 | (58) | 7.4e-005 | 1 | K.TDFFPSAFDMGRQ                                  |
| 3784 | 768.3718 | 1534.7290 | 1534.7272 | 0.49  | 0 | (75) | 4.3e-008 | 1 | R.MJEAADVQPAFVRL                                 |
| 3785 | 768.3838 | 1534.7830 | 1534.7815 | 1.02  | 0 | (44) | 0.008    | 1 | K.EQOITFAELLEQAQK                                |
| 3846 | 517.9180 | 1550.7231 | 1550.7221 | 0.64  | 0 | (43) | 0.0057   | 3 | R.MJEAADVQPAFVRL                                 |
| 3847 | 776.3891 | 1550.7238 | 1550.7221 | 0.98  | 0 | (81) | 1e-008   | 1 | R.MJEAADVQPAFVRL                                 |
| 3848 | 776.3893 | 1550.7241 | 1550.7221 | 1.27  | 0 | 87   | 2.3e-007 | 1 | R.MJEAADVQPAFVRL                                 |
| 3878 | 780.9101 | 1559.8058 | 1559.8051 | 0.38  | 0 | (70) | 2.1e-005 | 1 | K.GMMLJANQAELEKS                                 |
| 3906 | 784.3890 | 1588.7175 | 1588.7170 | 0.30  | 0 | (71) | 7.1e-008 | 1 | R.MJEAADVQPAFVRL 3905 3908                       |
| 3907 | 623.2486 | 1588.7177 | 1588.7170 | 0.44  | 0 | (48) | 0.0018   | 1 | R.MJEAADVQPAFVRL                                 |
| 3932 | 625.9232 | 1574.7478 | 1574.7484 | 0.82  | 0 | (48) | 0.0027   | 1 | K.ALPEPDIAGSGEYKA                                |
| 3933 | 788.3817 | 1574.7487 | 1574.7484 | 1.50  | 0 | 74   | 7e-008   | 1 | K.ALPEPDIAGSGEYKA 3931                           |
| 3937 | 628.2737 | 1575.7994 | 1575.8000 | -0.39 | 0 | (45) | 0.0059   | 1 | K.GMMLJANQAELEKS                                 |
| 3938 | 788.9080 | 1575.8015 | 1575.8000 | 0.94  | 0 | (87) | 3.9e-005 | 1 | K.GMMLJANQAELEKS                                 |
| 3939 | 788.9081 | 1575.8016 | 1575.8000 | 1.02  | 0 | 75   | 5.4e-008 | 1 | K.GMMLJANQAELEKS                                 |
| 3951 | 791.8153 | 1581.8181 | 1581.8181 | 0.65  | 0 | 89   | 1.9e-005 | 1 | K.AGAAVYFLDPLPGRLL                               |
| 3956 | 628.2836 | 1581.8591 | 1581.8587 | 0.27  | 1 | 39   | 0.015    | 1 | K.DRLNIAQILNRLH                                  |
| 4004 | 631.3007 | 1590.8903 | 1590.8903 | -0.01 | 1 | (81) | 7.9e-005 | 1 | R.VMFLDKQITQAKS                                  |
| 4006 | 631.6098 | 1591.7959 | 1591.7949 | 0.60  | 0 | (85) | 6.2e-005 | 1 | K.GMMLJANQAELEKS                                 |
| 4009 | 798.9057 | 1591.7988 | 1591.7949 | 1.21  | 0 | (89) | 2.5e-005 | 1 | K.GMMLJANQAELEKS 4007                            |
| 4037 | 801.8782 | 1601.7379 | 1601.7382 | 1.08  | 0 | 51   | 0.00061  | 1 | U KEYSFTWDELTVQRI                                |
| 4062 | 838.8334 | 1608.8783 | 1608.8783 | 1.88  | 1 | (55) | 0.00029  | 1 | R.VMFLDKQITQAKS                                  |
| 4065 | 804.4470 | 1608.8812 | 1608.8783 | 3.70  | 1 | 86   | 2.4e-007 | 1 | R.VMFLDKQITQAKS                                  |
| 4126 | 541.8353 | 1621.8539 | 1621.8528 | 0.71  | 1 | 51   | 0.001    | 1 | K.ETLLDAKQFAFVRL                                 |
| 4132 | 613.3232 | 1624.8519 | 1624.8277 | 2.58  | 0 | (49) | 0.00011  | 1 | K.QDNEAESYWSERLL                                 |
| 4154 | 616.3828 | 1630.7713 | 1630.7701 | 0.75  | 0 | 85   | 4.8e-005 | 1 | R.FVENYSPGSLMYKT                                 |
| 4174 | 619.9099 | 1637.8051 | 1637.8048 | 0.14  | 0 | (88) | 2.8e-006 | 1 | R.TPANGGQKPYSDYIKW                               |
| 4175 | 548.9425 | 1637.8057 | 1637.8048 | 0.48  | 0 | 72   | 1.2e-005 | 1 | R.TPANGGQKPYSDYIKW                               |
| 4182 | 547.2703 | 1638.7891 | 1638.7888 | 0.13  | 0 | (38) | 0.025    | 1 | R.TPANGGQKPYSDYIKW                               |
| 4183 | 820.4020 | 1638.7895 | 1638.7888 | 0.37  | 0 | (84) | 6.2e-005 | 1 | R.TPANGGQKPYSDYIKW                               |
| 4193 | 821.8340 | 1641.8834 | 1641.8843 | -0.52 | 0 | 102  | 6.2e-010 | 1 | K.QDNEAESYWSERLL                                 |
| 4208 | 824.3802 | 1648.7858 | 1648.7850 | 0.50  | 0 | (53) | 0.00089  | 1 | R.FVENYSPGSLMYKT 4206                            |
| 4217 | 550.8091 | 1648.8054 | 1648.8057 | -0.17 | 0 | (75) | 6.1e-008 | 1 | K.YASQDDIVSPTAGR.T                               |
| 4219 | 825.4117 | 1648.8088 | 1648.8057 | 1.91  | 0 | 95   | 5.8e-008 | 1 | K.YASQDDIVSPTAGR.T                               |
| 4224 | 825.9042 | 1649.7938 | 1649.7937 | 0.07  | 0 | (43) | 0.0082   | 1 | K.ETYTPDEIAHYKE                                  |
| 4226 | 550.8388 | 1649.7949 | 1649.7937 | 0.73  | 0 | 44   | 0.0078   | 1 | K.ETYTPDEIAHYKE                                  |
| 4252 | 553.6104 | 1657.8094 | 1657.8094 | 0.03  | 0 | (80) | 1.4e-008 | 1 | R.AGAGNEDIVAMDR.S                                |
| 4253 | 829.9125 | 1657.8105 | 1657.8094 | 0.71  | 0 | 115  | 5.4e-010 | 1 | R.AGAGNEDIVAMDR.S                                |
| 4276 | 833.9496 | 1685.8846 | 1685.8872 | -1.55 | 0 | (78) | 8.4e-008 | 1 | K.LNMAEHTAAVIRK                                  |
| 4288 | 558.9883 | 1687.8732 | 1687.8723 | 0.57  | 0 | 54   | 0.0002   | 1 | R.HLIIGDALVPHVSKVJ 4281 4282 4283 4284 4286 4289 |
| 4291 | 834.9844 | 1687.8742 | 1687.8723 | 1.18  | 0 | (37) | 0.0082   | 1 | R.HLIIGDALVPHVSKVJ                               |
| 4316 | 836.9333 | 1671.8820 | 1671.8801 | 1.14  | 0 | 80   | 0.00019  | 1 | U KALAVPETAEESLRL                                |
| 4317 | 419.2143 | 1672.8282 | 1672.8281 | 0.05  | 0 | (53) | 0.001    | 1 | R.LEDEGANQLAHHLRA                                |
| 4318 | 837.4214 | 1672.8282 | 1672.8281 | 0.08  | 0 | 90   | 2e-007   | 1 | R.LEDEGANQLAHHLRA                                |
| 4320 | 558.6188 | 1672.8285 | 1672.8281 | 0.21  | 0 | (83) | 8.9e-005 | 1 | R.LEDEGANQLAHHLRA                                |
| 4323 | 558.9422 | 1673.8048 | 1673.8043 | 0.30  | 0 | (59) | 0.00019  | 1 | R.AGAGNEDIVAMDR.S                                |
| 4325 | 837.9108 | 1673.8088 | 1673.8043 | 1.39  | 0 | (89) | 1.9e-007 | 1 | R.AGAGNEDIVAMDR.S 4324                           |
| 4351 | 840.9430 | 1679.8714 | 1679.8703 | 0.67  | 1 | 40   | 0.022    | 1 | R.D8NQLVNRHESLRT                                 |
| 4359 | 661.6338 | 1681.8795 | 1681.8821 | -1.53 | 0 | 100  | 1.8e-008 | 1 | K.LNMAEHTAAVIRK 4380                             |
| 4362 | 841.9485 | 1681.8825 | 1681.8821 | 0.28  | 0 | (82) | 9.9e-007 | 1 | K.LNMAEHTAAVIRK                                  |
| 4432 | 867.9883 | 1700.8629 | 1700.8622 | 0.43  | 1 | 88   | 2.7e-005 | 1 | K.KYNGAADFARFERT                                 |
| 4447 | 852.4284 | 1702.8423 | 1702.8413 | 0.65  | 1 | 88   | 4.4e-007 | 1 | R.KALPEPDIAGSGEYKA                               |
| 4448 | 868.8214 | 1702.8424 | 1702.8413 | 0.61  | 1 | (87) | 4e-005   | 1 | R.KALPEPDIAGSGEYKA                               |
| 4477 | 868.8292 | 1711.8438 | 1711.8417 | 1.28  | 0 | 88   | 4.5e-005 | 1 | K.AGAAFLPIDPTEERJ 4478                           |
| 4480 | 571.8449 | 1711.9129 | 1711.9145 | -0.94 | 0 | (82) | 8.3e-005 | 1 | R.NLAYVYTSGLTGKPK.G 4487                         |
| 4485 | 868.9842 | 1711.9139 | 1711.9145 | -0.33 | 0 | 81   | 1.1e-008 | 1 | R.NLAYVYTSGLTGKPK.G 4482                         |
| 4496 | 857.9210 | 1713.8274 | 1713.8283 | -0.57 | 0 | 83   | 7.3e-007 | 1 | R.LILEDFA8GYMQAEKE                               |
| 4505 | 573.2787 | 1716.8084 | 1716.8108 | -1.40 | 0 | 48   | 0.0022   | 1 | K.AGAAFLPIDPDPGRJ                                |
| 4518 | 859.8250 | 1717.8354 | 1717.8345 | 0.53  | 0 | (75) | 4.7e-008 | 1 | R.NPLFNVMVTTENPKKE                               |
| 4544 | 865.9196 | 1729.8247 | 1729.8233 | 0.83  | 0 | (87) | 2.9e-005 | 1 | R.LILEDFA8GYMQAEKE                               |
| 4561 | 867.9227 | 1733.8306 | 1733.8294 | 0.78  | 0 |      |          |   |                                                  |

|      |                 |                  |                  |             |          |             |                |          |                                                                                         |
|------|-----------------|------------------|------------------|-------------|----------|-------------|----------------|----------|-----------------------------------------------------------------------------------------|
| 4743 | 449.5028        | 1793.9820        | 1793.9821        | -0.07       | 1        | (50)        | 0.0011         | 1        | KLNMAEHTEAAVIRKN                                                                        |
| 4770 | 802.8300        | 1804.8682        | 1804.8686        | 0.88        | 0        | 82          | 1.1e-008       | 1        | R.TSFDMIDGVEVQTVHK.N                                                                    |
| 4774 | 802.8346        | 1804.8616        | 1804.8816        | -0.12       | 0        | 46          | 0.0008         | 1        | K.IYGGADMELPQHLYKD                                                                      |
| 4779 | 904.8221        | 1807.0296        | 1807.0386        | -3.30       | 1        | 82          | 2.8e-005       | 1        | R.LIAGFEQPSVLPGRLPVKK                                                                   |
| 4780 | 803.3828        | 1807.0386        | 1807.0386        | 0.51        | 1        | (38)        | 0.0008         | 1        | R.LIAGFEQPSVLPGRLPVKK                                                                   |
| 4790 | 453.5016        | 1809.9773        | 1809.9771        | 0.10        | 1        | (68)        | 0.00028        | 1        | KLNMAEHTEAAVIRKN                                                                        |
| 4791 | 804.3332        | 1809.9777        | 1809.9771        | 0.37        | 1        | (69)        | 1.3e-005       | 1        | KLNMAEHTEAAVIRKN                                                                        |
| 4792 | 905.9873        | 1809.9801        | 1809.9771        | 1.86        | 1        | (63)        | 0.00061        | 1        | KLNMAEHTEAAVIRKN                                                                        |
| 4807 | 454.2171        | 1812.8382        | 1812.8391        | 0.06        | 1        | (89)        | 1.7e-005       | 1        | K.TKVYVYEDSHADENR.Q                                                                     |
| 4808 | 805.2872        | 1812.8399        | 1812.8391        | 0.44        | 1        | 74          | 4.8e-008       | 1        | K.TKVYVYEDSHADENR.Q                                                                     |
| 4810 | 807.4290        | 1812.8414        | 1812.8391        | 1.29        | 1        | (88)        | 2.2e-005       | 1        | <a href="#">K.TKVYVYEDSHADENR.Q 4811</a>                                                |
| 4817 | 805.9689        | 1814.9690        | 1814.9670        | 0.82        | 0        | (45)        | 0.0089         | 1        | K.EFRFPDLNDAPLURA                                                                       |
| 4819 | 808.4690        | 1814.9716        | 1814.9670        | 2.00        | 0        | 46          | 0.0048         | 1        | K.EFRFPDLNDAPLURA                                                                       |
| 4825 | 809.9439        | 1817.8733        | 1817.8723        | 0.82        | 0        | 80          | 1.7e-008       | 1        | R.EEDIGLSFDYATALKFD                                                                     |
| 4839 | 807.9810        | 1820.8612        | 1820.8615        | -0.18       | 0        | (69)        | 0.00023        | 1        | <a href="#">R.TSFDMIDGVEVQTVHK.N 4838</a>                                               |
| 4840 | 911.4385        | 1820.8625        | 1820.8615        | 0.87        | 0        | (75)        | 4.8e-008       | 1        | R.TSFDMIDGVEVQTVHK.N                                                                    |
| 4844 | 807.9890        | 1820.9421        | 1820.9421        | 0.00        | 1        | 39          | 0.0027         | 1        | R.TGDLVKWVGGGIEYGR.I                                                                    |
| 4883 | 914.4778        | 1828.9411        | 1828.9414        | -0.17       | 0        | 100         | 2e-008         | 1        | U R.TPASTAVYEGVLTLYRE 4858 4859 4860                                                    |
| 4886 | 806.9879        | 1828.9419        | 1828.9414        | 0.27        | 0        | (83)        | 0.0001         | 1        | U R.TPASTAVYEGVLTLYRE                                                                   |
| 4908 | 819.4681        | 1838.9018        | 1838.9080        | -3.49       | 0        | (87)        | 4.1e-007       | 1        | R.HMTQTEATFAALFEK.Q 4909 4913                                                           |
| 4912 | 813.3102        | 1838.9067        | 1838.9080        | 0.38        | 0        | (77)        | 3.9e-008       | 1        | R.HMTQTEATFAALFEK.Q 4910 4911 4914                                                      |
| 4924 | 813.6421        | 1837.9044        | 1837.9820        | 8.78        | 0        | (38)        | 0.0048         | 1        | R.HMTQTEATFAALFEK.Q                                                                     |
| 4976 | 826.4778        | 1850.9410        | 1850.9414        | -0.22       | 1        | 72          | 1.2e-005       | 1        | R.TAPAGDKTFAQLEEVKT                                                                     |
| 4977 | 817.9883        | 1850.9432        | 1850.9414        | 0.96        | 1        | (51)        | 0.0017         | 1        | R.TAPAGDKTFAQLEEVKT                                                                     |
| 4989 | 827.4686        | 1852.9028        | 1852.9028        | -0.19       | 0        | 104         | 7.5e-009       | 1        | R.HMTQTEATFAALFEK.Q                                                                     |
| 4990 | 818.6428        | 1852.9069        | 1852.9028        | 1.81        | 0        | (90)        | 1.7e-007       | 1        | <a href="#">R.HMTQTEATFAALFEK.Q 4987</a>                                                |
| 5028 | 932.0080        | 1861.9874        | 1861.9838        | 1.94        | 0        | 108         | 3.8e-009       | 1        | <a href="#">K.LTSPHFHTVNTSSFAK.D 5027</a>                                               |
| 5029 | 821.6731        | 1861.9875        | 1861.9838        | 1.87        | 0        | (70)        | 1.5e-005       | 1        | K.LTSPHFHTVNTSSFAK.D                                                                    |
| 5078 | 838.9877        | 1875.8209        | 1875.8214        | -0.28       | 0        | 70          | 2.2e-005       | 1        | R.EEENGDIVQYKPGESKV                                                                     |
| 5079 | 828.3148        | 1875.8228        | 1875.8214        | 0.88        | 0        | (49)        | 0.0028         | 1        | R.EEENGDIVQYKPGESKV                                                                     |
| 5146 | 833.3546        | 1897.0420        | 1897.0421        | -0.08       | 0        | 82          | 7.2e-008       | 1        | <a href="#">K.LVPPGASGGLYTTQGLAR.Q 5150</a>                                             |
| 5152 | 949.8287        | 1897.0428        | 1897.0421        | 0.38        | 0        | (91)        | 9.2e-008       | 1        | K.LVPPGASGGLYTTQGLAR.Q 5139 5140 5141 5143 5144 5145 5147 5148 5149 5154 5155 5158 5159 |
| 5289 | 961.0145        | 1920.0144        | 1920.0179        | -1.82       | 0        | (48)        | 0.0089         | 1        | R.ISTMWLTSPFLNQLAK.D                                                                    |
| 5270 | 841.0132        | 1920.0179        | 1920.0179        | 0.00        | 0        | (53)        | 0.00091        | 1        | R.ISTMWLTSPFLNQLAK.D                                                                    |
| 5312 | 967.0046        | 1931.9946        | 1931.9983        | -0.34       | 0        | (73)        | 1.2e-005       | 1        | R.QADQGVPEVILTPIQR.W                                                                    |
| 5313 | 845.0057        | 1931.9954        | 1931.9983        | 0.06        | 0        | (65)        | 0.00089        | 1        | R.QADQGVPEVILTPIQR.W                                                                    |
| 5330 | 948.3498        | 1938.0094        | 1938.0128        | -1.75       | 0        | 70          | 2.1e-005       | 1        | R.ISTMWLTSPFLNQLAK.D                                                                    |
| 5331 | 989.0122        | 1938.0089        | 1938.0128        | -1.82       | 0        | (43)        | 0.01           | 1        | R.ISTMWLTSPFLNQLAK.D                                                                    |
| 5347 | 485.7892        | 1939.0478        | 1939.0482        | 0.72        | 0        | (48)        | 0.0022         | 1        | K.HLLLDMMHHIADGVS.R.Q 5342 5344                                                         |
| 5382 | <b>850.6813</b> | <b>1949.0222</b> | <b>1949.0218</b> | <b>0.20</b> | <b>0</b> | <b>(57)</b> | <b>0.00041</b> | <b>2</b> | <b>K.QADQGVPEVILTPIQR.W</b>                                                             |
| 5384 | 875.5198        | 1949.0230        | 1949.0218        | 0.64        | 0        | 85          | 6.5e-007       | 1        | K.QADQGVPEVILTPIQR.W 5383 5385                                                          |
| 5386 | 488.2708        | 1949.0541        | 1949.0555        | -0.68       | 2        | 45          | 0.0052         | 1        | R.LRSDLNQVNRHESLR.T                                                                     |
| 5389 | 880.8925        | 1949.0557        | 1949.0555        | 0.11        | 2        | (41)        | 0.011          | 1        | R.LRSDLNQVNRHESLR.T                                                                     |
| 5418 | 882.6886        | 1955.0379        | 1955.0411        | -1.63       | 0        | (69)        | 0.00021        | 1        | K.HLLLDMMHHIADGVS.R.Q                                                                   |
| 5421 | 489.7875        | 1955.0407        | 1955.0411        | -0.18       | 0        | 82          | 0.00011        | 1        | K.HLLLDMMHHIADGVS.R.Q 5422 5423 5424 5425                                               |
| 5484 | 887.0096        | 1972.0044        | 1972.0047        | -0.19       | 1        | 99          | 3.1e-008       | 1        | K.LVEGGLQKGETAAMNDR.S                                                                   |
| 5485 | 858.3424        | 1972.0054        | 1972.0047        | 0.33        | 1        | (74)        | 8.9e-008       | 1        | K.LVEGGLQKGETAAMNDR.S                                                                   |
| 5525 | 862.0214        | 1983.0424        | 1983.0425        | -0.06       | 1        | 53          | 0.00094        | 1        | U K.RTPASTAVYEGVLTLYRE 5530 5531                                                        |
| 5555 | 853.6739        | 1987.9998        | 1987.9997        | 0.09        | 1        | (88)        | 0.00037        | 1        | K.LVEGGLQKGETAAMNDR.S                                                                   |
| 5556 | 895.0075        | 1988.0005        | 1987.9997        | 0.40        | 1        | (84)        | 8.7e-005       | 1        | K.LVEGGLQKGETAAMNDR.S                                                                   |
| 5582 | 897.4991        | 1992.9837        | 1992.9828        | 0.88        | 1        | (83)        | 1.3e-008       | 1        | R.MEAKEQQTFAELLEQAK.Q                                                                   |
| 5583 | 865.3386        | 1992.9851        | 1992.9828        | 1.24        | 1        | (82)        | 0.00015        | 1        | R.MEAKEQQTFAELLEQAK.Q                                                                   |
| 5611 | 867.9880        | 2000.9421        | 2000.9401        | 1.01        | 0        | (82)        | 0.00012        | 1        | K.VSFEVLDYGSDEEMLR.S                                                                    |
| 5612 | 1001.4791       | 2000.9438        | 2000.9401        | 1.74        | 0        | 102         | 1.1e-008       | 1        | <a href="#">K.VSFEVLDYGSDEEMLR.S 5610</a>                                               |
| 5635 | 870.8689        | 2008.8790        | 2008.8775        | 0.72        | 1        | 89          | 3.2e-007       | 1        | R.MEAKEQQTFAELLEQAK.Q                                                                   |
| 5651 | 871.8830        | 2011.9872        | 2011.9873        | -0.03       | 0        | (48)        | 0.0036         | 1        | K.AELPEGMVAVHQVFEQAKR.T                                                                 |
| 5677 | 873.3190        | 2016.8383        | 2016.8380        | 0.12        | 0        | (87)        | 3.1e-005       | 1        | K.VSFEVLDYGSDEEMLR.S                                                                    |
| 5678 | 1009.4782       | 2016.8388        | 2016.8380        | 0.37        | 0        | (90)        | 0.00014        | 1        | K.VSFEVLDYGSDEEMLR.S 5678 5679 5680                                                     |
| 5707 | 1014.4844       | 2028.9542        | 2028.9517        | 1.22        | 0        | 103         | 9e-009         | 1        | R.NMFTAQGYEGTVLDDGKW                                                                    |
| 5708 | 878.6894        | 2028.9583        | 2028.9517        | 2.23        | 0        | (49)        | 0.0022         | 1        | R.NMFTAQGYEGTVLDDGKW                                                                    |
| 5709 | 1014.4917       | 2028.9688        | 2028.9870        | 0.92        | 0        | 82          | 1.2e-008       | 1        | R.QVSESEALYALSFSGMIR.N                                                                  |
| 5711 | 1014.9843       | 2027.9839        | 2027.9857        | 8.88        | 0        | (52)        | 0.0012         | 1        | R.NMFTAQGYEGTVLDDGKW                                                                    |
| 5714 | 878.9961        | 2027.9834        | 2027.9822        | 0.68        | 0        | (37)        | 0.038          | 1        | K.AELPEGMVAVHQVFEQAKR.T                                                                 |
| 5715 | 1014.9910       | 2027.9875        | 2027.9822        | 2.61        | 0        | 87          | 3.8e-005       | 1        | K.AELPEGMVAVHQVFEQAKR.T                                                                 |
| 5726 | 878.0196        | 2031.0371        | 2031.0371        | -0.01       | 0        | 129         | 2.9e-011       | 1        | R.LSDVLLSSAETAALLEER.H                                                                  |
| 5727 | 1016.5327       | 2031.0507        | 2031.0371        | 6.70        | 0        | (82)        | 1.3e-007       | 1        | R.LSDVLLSSAETAALLEER.H                                                                  |
| 5770 | 1021.8005       | 2041.1884        | 2041.1857        | 0.34        | 0        | (65)        | 9.9e-005       | 1        | R.VGVLTSPSLESAVLSVJKA                                                                   |
| 5771 | 811.2042        | 2041.1878        | 2041.1857        | 1.04        | 0        | (38)        | 0.0073         | 1        | R.VGVLTSPSLESAVLSVJKA                                                                   |
| 5773 | 881.4037        | 2041.1892        | 2041.1857        | 1.74        | 0        | 86          | 6.5e-008       | 1        | R.VGVLTSPSLESAVLSVJKA 5772 5774                                                         |
| 5779 | 1022.4893       | 2042.9840        | 2042.9819        | 1.01        | 0        | (53)        | 0.00091        | 1        | R.QVSESEALYALSFSGMIR.N                                                                  |
| 5784 | 882.3391        | 2043.9853        | 2043.9835        | 0.88        | 0        | (77)        | 3.9e-008       | 1        | R.QVSESEALYALSFSGMIR.N                                                                  |
| 5785 | 1023.0128       | 2044.0111        | 2043.9835        | 8.80        | 0        | (49)        | 0.0031         | 1        | R.QVSESEALYALSFSGMIR.N                                                                  |
| 5807 | 1028.5408       | 2051.0870        | 2051.0823        | 2.31        | 0        | (68)        | 0.00033        | 1        | R.THFQDQVPMGFVNTALR.M                                                                   |
| 5843 | 888.7343        | 2057.1811        | 2057.1806        | 0.24        | 0        | (70)        | 4.8e-008       | 1        | R.VGVLTSPSLESAVLSVJKA                                                                   |
| 5844 | 1029.5989       | 2057.1832        | 2057.1806        | 1.27        | 0        | (69)        | 0.0001         | 1        | R.VGVLTSPSLESAVLSVJKA                                                                   |
| 5851 | 887.8707        | 2059.9803        | 2059.9884        | 0.92        | 0        | (90)        | 0.00022        | 1        | R.QVSESEALYALSFSGMIR.N                                                                  |
| 5852 | 1031.0029       | 2059.9913        | 2059.9884        | 1.40        | 0        | (73)        | 1e-005         | 1        | R.QVSESEALYALSFSGMIR.N                                                                  |
| 5884 | 860.0299        | 2067.0589        | 2067.0572        | 0.85        | 0        | 83          | 0.00012        | 1        | R.THFQDQVPMGFVNTALR.M                                                                   |
| 5885 | 1034.8391       | 2067.0616        | 2067.0572        | 2.15        | 0        | (91)        | 0.00018        | 1        | R.THFQDQVPMGFVNTALR.M                                                                   |
| 5896 | 891.8840        | 2071.8702        | 2071.8988        | 0.18        | 1        | (54)        | 0.00085        | 1        | K.AEVDLHFPEAKEDEADK.I                                                                   |
| 5897 | 819.0001        | 2071.8714        | 2071.8988        | 0.78        | 1        | (48)        | 0.0041         | 1        | K.AEVDLHFPEAKEDEADK.I                                                                   |
| 5898 | 1036.9969       | 2071.8771        | 2071.8988        | 3.54        | 1        | 83          | 8.2e-005       | 1        | K.AEVDLHFPEAKEDEADK.I                                                                   |
| 5942 | 821.7911        | 2083.1362        | 2083.1380        | -0.40       | 1        | 45          | 0.0047         | 1        | K.HLLLDMMHHIADGVS.R.Q 5944 5947                                                         |
| 5973 | 897.8919        | 2090.0538        | 2090.0531        | 0.34        | 0        | (91)        | 0.00023        | 1        | K.GGNTAAAYTPESADIALK.S                                                                  |
| 5974 | 1046.0375       | 2090.0804        | 2090.0531        | 3.48        | 0        | 87          | 4.9e-005       | 1        | K.GGNTAAAYTPESADIALK.S                                                                  |
| 5978 | 898.3449        | 2082.0129        | 2082.0081        | 2.27        | 0        | (83)        | 1.3e-008       | 1        | R.TNADVQDMGMPFVNTALR.M                                                                  |
| 5979 | 1047.0143       | 2082.0140        | 2082.0081        | 2.80        | 0        | (95)        | 7.5e-008       | 1        | R.TNADVQDMGMPFVNTALR.M                                                                  |
| 6007 | 701.0408        | 2100.1007        | 2100.0987        | 0.48        | 1        | 115         | 6.7e-010       | 1        | R.KLVEGGLQKGETAAMNDR.S                                                                  |
| 6008 | 828.0328        | 2100.1016        | 2100.0987        | 0.85        | 2        | (68)        | 0.00033        | 1        | R.KLVEGGLQKGETAAMNDR.S                                                                  |
| 6032 | 703.6739        | 2107.9998        | 2108.0031        | -1.53       | 0        | (82)        | 1.2e-008       | 1        | R.TNADVQDMGMPFVNTALR.M                                                                  |
| 6033 | 1055.0090       | 2108.0036        | 2108.0031        | 0.21        | 0        | (101)       | 1.8e-008       | 1        | R.TNADVQDMGMPFVNTALR.M                                                                  |
| 6034 | 703.6752        | 2108.0037        | 2108.0031        | 0.29        | 0        | (82)        | 1.2e-007       | 1        | R.TNADVQDMGMPFVNTALR.M                                                                  |
| 6035 | 1055.0116       | 2108.0084        | 2108.0031        | 2.82        | 0        | 102         | 1.1e-008       | 1        | R.TNADVQDMGMPFVNTALR.M                                                                  |
| 6064 | 830.0313        | 2116.0969        | 2116.0946        | 0.60        | 2        | (69)        | 0.00036        | 1        | R.KLVEGGLQKGETAAMNDR.S                                                                  |
| 6065 | 708.3726        | 2116.0980        | 2116.0946        | 0.67        | 2        | (74)        | 1e-005         | 1        | R.KLVEGGLQKGETAAMNDR.S                                                                  |
| 6067 | 1059.0595       | 2116.1024        | 2116.0946        | 3.87        | 2        | (88)        | 5.8e-007       | 1        | R.KLVEGGLQKGETAAMNDR.S                                                                  |
| 6089 | 708.8876        | 2117.0410        | 2117.0429        | -0.89       | 0        | 83          | 0.00013        | 1        | <a href="#">K.DLFQHTTEELTOYVERA 6070</a>                                                |
| 6073 | 1059.5322       | 2117.0499        | 2117.0429        | 3.30        | 0        | (90)        | 0.00022        | 1        | K.DLFQHTTEELTOYVERA                                                                     |
| 6078 | 707.0209        | 2118.0410        | 2118.0289        | 6.64        | 0        | (45)        | 0.0084         | 1        | K.DLFQHTTEELTOYVERA                                                                     |
| 6087 | 707.8629        | 2119.9899        | 2119.9833        | 1.70        | 1        | 89          | 1.7e-005       | 1        | R.NQGVLSGSYNEKFEPLA                                                                     |
| 6093 | 708.0087        | 2123.9893        | 2123.9980        | 0.15        | 0        | (84)        | 7.7e-007       | 1        | R.TNADVQDMGMPFVNTALR.M                                                                  |
| 6095 | 1083.0112       | 2124.0079        | 2123.9980        | 4.67        | 0        | (100)       | 1.9e-008       | 1        | R.TNADVQDMGMPFVNTALR.M                                                                  |
| 6101 | 709.8522        | 2125.8947        | 2126.8941        | 0.28        | 1        | (72)        | 4.8e-008       | 1        | K.WLQGDNEAESYWSER.L                                                                     |
| 6102 | 1083.0782       | 2125.8959        | 2126.8941        | 0.88        | 1        | 103         | 3.8e-009       | 1        | K.WLQGDNEAESYWSER.L                                                                     |
| 6304 | 728.8983        | 2188.0670        | 2188.0684        | -0.63       | 1        | 54          | 0.00088        | 1        | K.AELPEGMVAVHQVFEQAKR.T                                                                 |
| 6306 | 1085.0441       | 2188.0738        | 2188.0684        | 2.39        | 1        | (45)        | 0.00089        | 1        | K.AELPEGMVAVHQVFEQAKR.T                                                                 |
| 6322 | 844.3251        | 2173.2714        | 2173.2896        | 0.90        | 0        | (30)        | 0.025          | 1        | <a href="#">K.RPTGRPIANAGALVLEAKL 6328</a>                                              |
| 6324 | 725.4311        | 2173.2714        | 2173.2896        | 0.91        | 0        | 41          | 0              |          |                                                                                         |

|      |           |           |           |        |   |       |          |   |                                                  |
|------|-----------|-----------|-----------|--------|---|-------|----------|---|--------------------------------------------------|
| 6483 | 738.3827  | 2212.1282 | 2212.1223 | 1.79   | 0 | (76)  | 9e-008   | 1 | KAVADNPNQPLSSLSLVTEK.Q                           |
| 6484 | 1107.0732 | 2212.1919 | 2212.1223 | 4.38   | 0 | 83    | 1.3e-008 | 1 | KAVADNPNQPLSSLSLVTEK.Q                           |
| 6502 | 1111.0837 | 2220.0929 | 2220.0810 | 0.83   | 0 | 103   | 1.3e-008 | 1 | K.QEGISVPSDVTGDVLLDGSRT                          |
| 6503 | 741.0383  | 2220.0932 | 2220.0810 | 0.97   | 0 | (87)  | 4.4e-007 | 1 | K.QEGISVPSDVTGDVLLDGSRT                          |
| 6524 | 742.7029  | 2225.0868 | 2225.0885 | 0.14   | 0 | (58)  | 0.00074  | 1 | KARPVTVYNGQSWTYGELNKA 6525 6527                  |
| 6529 | 1113.5564 | 2225.0963 | 2225.0885 | 4.40   | 0 | 80    | 0.00023  | 1 | KARPVTVYNGQSWTYGELNKA                            |
| 6535 | 743.0343  | 2226.0611 | 2226.0705 | 4.74   | 0 | (47)  | 0.0049   | 1 | KARPVTVYNGQSWTYGELNKA                            |
| 6541 | 745.8801  | 2234.0183 | 2234.0188 | 0.70   | 1 | 82    | 8.7e-005 | 1 | KEQTVYKQDEEYVLDVFK.G                             |
| 6542 | 1118.0207 | 2234.0289 | 2234.0188 | 4.88   | 1 | (43)  | 0.0082   | 1 | KEQTVYKQDEEYVLDVFK.G                             |
| 6562 | 1121.0503 | 2240.0680 | 2240.0792 | 3.06   | 0 | 115   | 7.3e-010 | 1 | R.SPLFSVMFNMQNMIEPSRL.L                          |
| 6566 | 748.0398  | 2241.0879 | 2241.0832 | 11.0   | 0 | (54)  | 0.001    | 1 | R.SPLFSVMFNMQNMIEPSRL.L                          |
| 6606 | 753.0319  | 2258.0738 | 2258.0741 | -0.15  | 0 | (78)  | 2.4e-005 | 1 | R.SPLFSVMFNMQNMIEPSRL.L                          |
| 6609 | 1129.0477 | 2258.0809 | 2258.0741 | 3.02   | 0 | (72)  | 1.3e-005 | 1 | R.SPLFSVMFNMQNMIEPSRL.L                          |
| 6622 | 758.3821  | 2272.0845 | 2272.0890 | -1.97  | 0 | (88)  | 2.5e-005 | 1 | R.SPLFSVMFNMQNMIEPSRL.L                          |
| 6633 | 758.3843  | 2272.0711 | 2272.0890 | 0.88   | 0 | (82)  | 0.00012  | 1 | R.SPLFSVMFNMQNMIEPSRL.L                          |
| 6654 | 1137.0432 | 2272.0719 | 2272.0890 | 1.28   | 0 | (38)  | 0.029    | 1 | R.SPLFSVMFNMQNMIEPSRL.L                          |
| 6655 | 1137.0440 | 2272.0735 | 2272.0890 | 1.91   | 0 | (83)  | 1e-008   | 1 | R.SPLFSVMFNMQNMIEPSRL.L                          |
| 6701 | 780.7367  | 2276.1862 | 2276.1910 | -1.21  | 1 | (57)  | 0.00061  | 1 | KALPVPDTKVHQLFEETAQR.H                           |
| 6702 | 570.8054  | 2276.1923 | 2276.1910 | 0.59   | 1 | 73    | 1.1e-005 | 1 | KALPVPDTKVHQLFEETAQR.H                           |
| 6728 | 765.6976  | 2288.0707 | 2288.0838 | 2.98   | 0 | (77)  | 3e-008   | 1 | R.SPLFSVMFNMQNMIEPSRL.L                          |
| 6748 | 1145.6337 | 2288.0828 | 2288.0478 | 2.13   | 0 | (44)  | 0.0085   | 1 | R.SPLFSVMFNMQNMIEPSRL.L                          |
| 6757 | 764.3796  | 2290.1171 | 2290.1158 | 0.68   | 0 | (81)  | 0.0002   | 1 | K.VESAFQTSFDPLVYPGKT                             |
| 6758 | 1146.0874 | 2290.1202 | 2290.1158 | 1.94   | 0 | 81    | 0.0002   | 1 | K.VESAFQTSFDPLVYPGKT                             |
| 6841 | 772.0885  | 2313.1477 | 2313.1488 | -0.47  | 2 | 71    | 2.2e-005 | 1 | K.AEVDLHFEAKEDEADQKICE                           |
| 6855 | 772.7628  | 2315.2380 | 2315.2346 | 0.84   | 1 | 54    | 0.00079  | 1 | <a href="#">K.IGNLEGHGREDIPVNSR.T.6859</a>       |
| 6824 | 776.7322  | 2333.1747 | 2333.1750 | -0.14  | 1 | (89)  | 3.9e-005 | 1 | KDKGGNTAAAYVTPESADIEALKS                         |
| 6825 | 1167.5699 | 2333.1851 | 2333.1750 | 4.33   | 1 | 70    | 2.7e-005 | 1 | KDKGGNTAAAYVTPESADIEALKS                         |
| 6829 | 779.0817  | 2334.2232 | 2334.2178 | 2.25   | 1 | 84    | 8.9e-005 | 1 | RAEGKQADQGPVEGVLTPQR.W                           |
| 6855 | 782.3880  | 2344.1722 | 2344.1546 | 7.49   | 0 | 81    | 0.0002   | 1 | KEQLTLQLSISPYEAGHGTSK.F                          |
| 6858 | 783.0291  | 2346.0855 | 2346.0852 | 0.15   | 0 | (87)  | 2.2e-007 | 1 | R.NLNTYVSWFSEASLTENDKT                           |
| 6859 | 1174.0426 | 2346.0798 | 2346.0852 | 2.34   | 0 | 97    | 2.6e-008 | 1 | R.NLNTYVSWFSEASLTENDKT                           |
| 6864 | 784.3876  | 2360.0808 | 2360.0753 | 2.25   | 1 | (80)  | 1.4e-008 | 1 | U K.DEYVWKEYSFTWDELVGR.I                         |
| 6865 | 1178.0492 | 2360.0838 | 2360.0753 | 3.81   | 1 | 94    | 5.4e-008 | 1 | U K.DEYVWKEYSFTWDELVGR.I                         |
| 6878 | 785.3879  | 2363.1418 | 2363.1372 | 1.94   | 1 | (70)  | 2.4e-005 | 1 | R.NMTAIGQYEGTVSLDDGKWR.N                         |
| 6879 | 1177.5807 | 2363.1488 | 2363.1372 | 4.08   | 1 | 101   | 2e-008   | 1 | R.NMTAIGQYEGTVSLDDGKWR.N                         |
| 6891 | 786.0500  | 2365.1291 | 2365.1063 | 9.72   | 1 | (88)  | 5.7e-005 | 1 | R.NMTAIGQYEGTVSLDDGKWR.N                         |
| 7025 | 790.7201  | 2389.1384 | 2389.1322 | 2.65   | 1 | (87)  | 5.1e-007 | 1 | <a href="#">R.NMTAIGQYEGTVSLDDGKWR.N.7029</a>    |
| 7026 | 1185.6776 | 2389.1405 | 2389.1322 | 3.51   | 1 | (85)  | 8.4e-007 | 1 | <a href="#">R.NMTAIGQYEGTVSLDDGKWR.N.7029</a>    |
| 7027 | 790.7316  | 2389.1729 | 2389.1686 | 1.84   | 0 | (58)  | 0.00042  | 1 | R.QLAAYMEASVSGGHQVLKPADK.Q                       |
| 7035 | 791.4074  | 2371.2004 | 2371.1842 | 6.85   | 0 | (42)  | 0.018    | 1 | R.QLAAYMEASVSGGHQVLKPADK.Q                       |
| 7073 | 867.5582  | 2386.1955 | 2386.1951 | 0.18   | 0 | (42)  | 0.017    | 1 | R.QLAAYMEASVSGGHQVLKPADK.Q                       |
| 7074 | 796.4082  | 2386.1987 | 2386.1951 | 0.70   | 0 | 82    | 0.0002   | 1 | R.QLAAYMEASVSGGHQVLKPADK.Q                       |
| 7100 | 1198.5979 | 2385.1812 | 2385.1783 | 2.07   | 0 | (97)  | 5e-008   | 1 | R.QTISYVWMPVLLMEGELDISRL.L                       |
| 7101 | 798.4012  | 2385.1817 | 2385.1783 | 2.28   | 0 | (81)  | 2.2e-008 | 1 | R.QTISYVWMPVLLMEGELDISRL.L                       |
| 7102 | 1198.1038 | 2386.1830 | 2386.1803 | 18.8   | 0 | (59)  | 0.0012   | 1 | R.QTISYVWMPVLLMEGELDISRL.L                       |
| 7141 | 804.7308  | 2411.1705 | 2411.1712 | -0.31  | 0 | (82)  | 0.00014  | 1 | R.QTISYVWMPVLLMEGELDISRL.L                       |
| 7142 | 1206.5945 | 2411.1744 | 2411.1712 | 1.32   | 0 | (101) | 2e-008   | 1 | <a href="#">R.QTISYVWMPVLLMEGELDISRL.L.7144</a>  |
| 7143 | 804.7325  | 2411.1768 | 2411.1712 | 1.90   | 0 | 104   | 1e-008   | 1 | R.QTISYVWMPVLLMEGELDISRL.L                       |
| 7175 | 806.7693  | 2423.2681 | 2423.2710 | -1.19  | 0 | (54)  | 0.00092  | 1 | R.ETAGDHLIAVHLVDDGVSWR.L                         |
| 7186 | 806.8282  | 2423.2788 | 2423.2710 | 1.98   | 0 | 57    | 0.00039  | 1 | R.ETAGDHLIAVHLVDDGVSWR.L                         |
| 7189 | 806.4062  | 2425.1938 | 2425.1947 | -0.45  | 1 | 51    | 0.00024  | 1 | R.MVYREENGQVQYKPIGESK.V                          |
| 7197 | 1213.6078 | 2425.2013 | 2425.1947 | 2.70   | 1 | (38)  | 0.041    | 1 | R.MVYREENGQVQYKPIGESK.V                          |
| 7208 | 810.0838  | 2427.1890 | 2427.1881 | 1.17   | 0 | (97)  | 4.5e-008 | 1 | R.QTISYVWMPVLLMEGELDISRL.L                       |
| 7209 | 1214.5680 | 2427.1754 | 2427.1881 | 3.81   | 0 | (91)  | 2.3e-007 | 1 | R.QTISYVWMPVLLMEGELDISRL.L                       |
| 7210 | 810.0898  | 2427.1871 | 2427.1827 | 10.0   | 1 | (43)  | 0.013    | 1 | R.MVYREENGQVQYKPIGESK.V                          |
| 7219 | 811.7325  | 2432.1768 | 2432.1747 | 0.44   | 1 | (81)  | 2.1e-008 | 1 | R.EEDIGLSPDYATLFDKDIR.R                          |
| 7220 | 1217.0888 | 2432.1829 | 2432.1747 | 3.38   | 1 | 103   | 1.1e-008 | 1 | R.EEDIGLSPDYATLFDKDIR.R                          |
| 7241 | 814.7388  | 2441.1888 | 2441.1886 | -0.41  | 1 | (43)  | 0.014    | 1 | R.MVYREENGQVQYKPIGESK.V                          |
| 7247 | 815.0884  | 2442.1774 | 2442.1738 | 1.54   | 1 | (44)  | 0.0088   | 1 | R.MVYREENGQVQYKPIGESK.V                          |
| 7280 | 820.0783  | 2457.2129 | 2457.2097 | 1.30   | 1 | 57    | 0.00046  | 1 | K.VSFEVDLYGSEEMLRBQK.I                           |
| 7323 | 1237.6152 | 2473.2169 | 2473.2046 | 4.58   | 1 | (47)  | 0.005    | 1 | K.VSFEVDLYGSEEMLRBQK.I                           |
| 7332 | 827.0833  | 2478.1680 | 2478.1703 | -0.91  | 2 | 103   | 1.1e-008 | 1 | U K.DEYVWKEYSFTWDELVGR.I 7333 7335               |
| 7334 | 820.5498  | 2478.1701 | 2478.1703 | -0.08  | 2 | (48)  | 0.0007   | 1 | U K.DEYVWKEYSFTWDELVGR.I 7336 7337               |
| 7341 | 827.3832  | 2479.1577 | 2479.1543 | 1.38   | 2 | (60)  | 0.00022  | 1 | U K.DEYVWKEYSFTWDELVGR.I                         |
| 7385 | 830.7816  | 2489.2828 | 2489.2850 | 3.04   | 2 | 80    | 0.0003   | 1 | K.GREEDAEIIFVQPFELNRA                            |
| 7386 | 830.7780  | 2489.3082 | 2489.3013 | 1.98   | 1 | 57    | 0.00048  | 1 | K.GGNTAAAYVTPESADIEALSKALKE                      |
| 7370 | 831.7826  | 2482.3680 | 2482.3540 | 0.80   | 0 | 74    | 5.5e-008 | 1 | K.TANLHQVTGPNLFAVWGNLSKY                         |
| 7371 | 1247.1855 | 2482.3685 | 2482.3540 | 1.03   | 0 | (88)  | 3.4e-005 | 1 | K.TANLHQVTGPNLFAVWGNLSKY                         |
| 7380 | 834.0824  | 2489.1655 | 2489.1652 | 0.10   | 0 | (50)  | 0.0019   | 1 | K.ELPAPQSEAVQPEYAAPETESBKK                       |
| 7381 | 1250.5914 | 2489.1683 | 2489.1652 | 1.23   | 0 | 86    | 4.5e-005 | 1 | K.ELPAPQSEAVQPEYAAPETESBKK                       |
| 7391 | 828.5873  | 2602.2389 | 2602.2390 | 0.38   | 1 | 83    | 0.00014  | 1 | <a href="#">K.DLFQHTBEELTOYVERAEGK.Q.7390</a>    |
| 7392 | 835.0873  | 2602.2400 | 2602.2390 | 0.39   | 1 | (80)  | 0.00031  | 1 | <a href="#">K.DLFQHTBEELTOYVERAEGK.Q.7390</a>    |
| 7416 | 837.7820  | 2610.2841 | 2610.2814 | 1.08   | 0 | (50)  | 0.00031  | 1 | U K.VLFEQTOIEMALYLEENESKE                        |
| 7449 | 843.0942  | 2628.2807 | 2628.2883 | 1.75   | 0 | 87    | 5.3e-005 | 1 | U K.VLFEQTOIEMALYLEENESKE                        |
| 7459 | 843.7804  | 2628.2693 | 2628.2693 | -3.08  | 0 | 44    | 0.011    | 1 | R.VYLQEGNKVQPEVAGELCYAQR.G                       |
| 7528 | 844.0744  | 2672.2885 | 2672.2870 | 0.58   | 1 | 43    | 0.015    | 1 | K.VBRDAAFADIFTAQGHVWAEYR.Y                       |
| 7601 | 852.3205  | 2605.2529 | 2605.2383 | 5.59   | 0 | (42)  | 0.017    | 1 | K.MYGHTEFINHYGTEATGAIAGR.V                       |
| 7631 | 873.7751  | 2618.3034 | 2618.3050 | -0.80  | 1 | 84    | 0.00013  | 1 | K.LEMKQLGQHTBEELTOYVERA                          |
| 7632 | 855.5839  | 2618.3063 | 2618.3050 | 0.51   | 1 | (41)  | 0.024    | 1 | K.LEMKQLGQHTBEELTOYVERA                          |
| 7645 | 856.3153  | 2621.2321 | 2621.2333 | -0.43  | 0 | (42)  | 0.015    | 1 | K.MYGHTEFINHYGTEATGAIAGR.V                       |
| 7646 | 874.7916  | 2621.2329 | 2621.2333 | -0.12  | 0 | 53    | 0.0001   | 1 | K.MYGHTEFINHYGTEATGAIAGR.V                       |
| 7647 | 1811.6283 | 2621.2381 | 2621.2333 | 1.88   | 0 | (45)  | 0.0074   | 1 | K.MYGHTEFINHYGTEATGAIAGR.V                       |
| 7667 | 876.7803  | 2627.2591 | 2627.2602 | -0.42  | 1 | 48    | 0.0043   | 1 | K.ELPAPQSEAVQPEYAAPETESBKK.L                     |
| 7669 | 876.7813  | 2627.2620 | 2627.2602 | 0.70   | 1 | 46    | 0.0088   | 1 | K.ELPAPQSEAVQPEYAAPETESBKK.L                     |
| 7686 | 876.1081  | 2634.3024 | 2634.2898 | 0.95   | 1 | (82)  | 0.00021  | 1 | K.LEMKQLGQHTBEELTOYVERA                          |
| 7746 | 889.4619  | 2685.3837 | 2685.3640 | -0.09  | 0 | 78    | 4.7e-008 | 1 | R.TVQWFTAQYVPLDISDASAVIKT 7745 7747              |
| 7749 | 1333.6832 | 2685.3719 | 2685.3640 | 2.90   | 0 | (74)  | 1.1e-005 | 1 | R.TVQWFTAQYVPLDISDASAVIKT                        |
| 7786 | 871.6184  | 2682.4385 | 2682.4327 | 1.40   | 0 | (89)  | 2.6e-007 | 1 | R.IELSEIEVQLQLSEVQDAAVTAVK.D                     |
| 7797 | 895.1839  | 2682.4388 | 2682.4327 | 2.84   | 0 | (111) | 1.4e-009 | 1 | R.IELSEIEVQLQLSEVQDAAVTAVK.D                     |
| 7798 | 1342.2290 | 2682.4434 | 2682.4327 | 4.00   | 0 | 113   | 8.5e-010 | 1 | R.IELSEIEVQLQLSEVQDAAVTAVK.D                     |
| 7812 | 898.8202  | 2687.4389 | 2687.4382 | 0.29   | 1 | 107   | 4.1e-009 | 1 | <a href="#">K.LLLKQEGISVPSDVTGDVLLDGSRT.7813</a> |
| 7815 | 1945.2283 | 2688.4420 | 2688.4222 | 7.37   | 1 | (89)  | 2.3e-005 | 1 | K.LLLKQEGISVPSDVTGDVLLDGSRT                      |
| 7910 | 909.4829  | 2725.3368 | 2725.3417 | -1.78  | 0 | (72)  | 2e-005   | 1 | K.SLMAETDTTMYMFLAARVLLSKY                        |
| 7919 | 911.4301  | 2731.2863 | 2731.2788 | -3.10  | 1 | 82    | 0.0013   | 1 | R.DTSSRPLFSVMFNMQNMIEPSRL.L                      |
| 7920 | 911.4386  | 2731.2881 | 2731.2788 | 4.15   | 1 | (41)  | 0.019    | 1 | R.DTSSRPLFSVMFNMQNMIEPSRL.L                      |
| 7921 | 884.1136  | 2732.4250 | 2732.4232 | 0.67   | 2 | (68)  | 0.00088  | 1 | KDKGGNTAAAYVTPESADIEALGALK.E                     |
| 7922 | 911.8186  | 2732.4278 | 2732.4232 | 1.87   | 2 | 72    | 1.7e-005 | 1 | KDKGGNTAAAYVTPESADIEALGALK.E                     |
| 7923 | 1987.2290 | 2732.4354 | 2732.4232 | 4.47   | 2 | (40)  | 0.025    | 1 | KDKGGNTAAAYVTPESADIEALGALK.E                     |
| 7937 | 914.7876  | 2741.3408 | 2741.3398 | 1.54   | 0 | (80)  | 3.2e-008 | 1 | K.SLMAETDTTMYMFLAARVLLSKY                        |
| 7938 | 1971.6794 | 2741.3443 | 2741.3398 | 2.83   | 0 | 91    | 2.8e-007 | 1 | K.SLMAETDTTMYMFLAARVLLSKY                        |
| 7946 | 917.1008  | 2748.2799 | 2748.2867 | 8.82   | 1 | (47)  | 0.0043   | 1 | R.DTSSRPLFSVMFNMQNMIEPSRL.L                      |
| 7952 | 888.3401  | 2749.3315 | 2749.3282 | 1.19   | 1 | 38    | 0.049    | 1 | R.KYGHTEFINHYGTEATGAIAGR.V                       |
| 7964 | 889.8448  | 2755.3603 | 2755.3651 | -1.78  | 2 | 45    | 0.01     | 1 | K.ELPAPQSEAVQPEYAAPETESBKK.L                     |
| 7987 | 1979.6788 | 2757.3370 | 2757.3315 | 2.00   | 0 | (82)  | 0.00019  | 1 | K.SLMAETDTTMYMFLAARVLLSKY                        |
| 7988 | 920.1205  | 2757.3388 | 2757.3315 | 2.94   | 0 | (97)  | 5.5e-005 | 1 | K.SLMAETDTTMYMFLAARVLLSKY                        |
| 7992 | 1988.6790 | 2771.3434 | 2771.3727 | -10.80 | 1 | (45)  | 0.005    | 1 | RILLEDFA8GYMKAKEESLVFPQKT                        |
| 7995 | 893.8909  | 2771.3745 | 2771.3727 | 0.82   | 1 | (82)  | 0.0021   | 1 | RILLEDFA8GYMKAKEESLVFPQKT                        |
| 8012 | 896.8327  | 2782.5019 | 2782.50   |        |   |       |          |   |                                                  |

|       |           |           |           |       |   |      |          |   |                                                                                     |
|-------|-----------|-----------|-----------|-------|---|------|----------|---|-------------------------------------------------------------------------------------|
| 8343  | 876.1987  | 2825.5883 | 2825.5546 | 4.89  | 1 | 80   | 1.5e-008 | 1 | R.IE.LS.EI.EV.QL.AQ.LS.EV.QD.AA.VT.AV.KD.G                                          |
| 8356  | 1468.2330 | 2834.4515 | 2834.4399 | 3.94  | 1 | 39   | 0.042    | 1 | K.A.G.A.F.V.P.I.P.D.P.Y.D.P.O.R.I.E.V.L.Q.D.S.G.A.K.L                               |
| 8380  | 983.4919  | 2847.4540 | 2847.4491 | 1.85  | 0 | 65   | 0.00011  | 1 | K.F.D.L.T.L.G.G.F.T.D.E.N.G.I.Q.L.E.Y.A.T.L.F.A.K.E                                 |
| 8381  | 1474.7383 | 2847.4561 | 2847.4491 | 2.38  | 0 | (60) | 0.00034  | 1 | K.F.D.L.T.L.G.G.F.T.D.E.N.G.I.Q.L.E.Y.A.T.L.F.A.K.E                                 |
| 8393  | 1476.7279 | 2851.4413 | 2851.4301 | 3.78  | 0 | (58) | 0.0011   | 1 | K.Q.T.N.L.S.A.L.E.H.Q.E.Y.P.F.E.D.L.V.N.G.L.D.L.P.R.D                               |
| 8399  | 985.1497  | 2852.4273 | 2852.4141 | 4.48  | 0 | (58) | 0.00085  | 1 | K.Q.T.N.L.S.A.L.E.H.Q.E.Y.P.F.E.D.L.V.N.G.L.D.L.P.R.D 8400                          |
| 8428  | 990.4901  | 2868.4483 | 2868.4586 | -2.80 | 0 | 104  | 1.3e-008 | 1 | K.Q.T.N.L.S.A.L.E.H.Q.E.Y.P.F.E.D.L.V.N.G.L.D.L.P.R.D 8429 8430                     |
| 8441  | 1485.7396 | 2899.4647 | 2899.4406 | 6.10  | 0 | (42) | 0.021    | 1 | K.Q.T.N.L.S.A.L.E.H.Q.E.Y.P.F.E.D.L.V.N.G.L.D.L.P.R.D                               |
| 8453  | 993.4947  | 2977.4624 | 2977.4597 | 0.93  | 1 | 42   | 0.025    | 1 | K.F.D.L.S.E.A.V.E.E.E.D.I.G.L.S.F.Y.A.T.A.L.F.K.D                                   |
| 8514  | 1003.5490 | 3007.8252 | 3007.8206 | 1.58  | 0 | 47   | 0.0027   | 1 | K.Q.L.S.L.T.L.P.S.H.M.I.P.F.F.V.Q.D.A.I.P.L.T.A.N.G.K.T                             |
| 8535  | 1008.8798 | 3023.8171 | 3023.8154 | 0.65  | 0 | (42) | 0.01     | 1 | K.Q.L.S.L.T.L.P.S.H.M.I.P.F.F.V.Q.D.A.I.P.L.T.A.N.G.K.T                             |
| 8584  | 785.6608  | 3058.8135 | 3058.8198 | -1.68 | 1 | (77) | 4.7e-008 | 1 | R.G.Y.R.I.E.S.E.I.V.Q.L.A.Q.L.S.E.V.Q.D.A.A.V.T.A.V.K.D 8586                        |
| 8597  | 1020.5485 | 3058.8238 | 3058.8198 | 1.82  | 1 | 88   | 5.7e-007 | 1 | R.G.Y.R.I.E.S.E.I.V.Q.L.A.Q.L.S.E.V.Q.D.A.A.V.T.A.V.K.D 8588                        |
| 8591  | 1630.8185 | 3059.8185 | 3059.8028 | 5.19  | 1 | (72) | 1.3e-005 | 1 | R.G.Y.R.I.E.S.E.I.V.Q.L.A.Q.L.S.E.V.Q.D.A.A.V.T.A.V.K.D                             |
| 8592  | 1631.2720 | 3060.8294 | 3060.8287 | 0.89  | 0 | (85) | 0.0012   | 1 | R.M.A.G.T.G.A.V.S.F.D.A.G.T.F.E.V.F.G.A.L.L.N.G.A.L.Y.P.V.K.K                       |
| 8593  | 1021.1850 | 3060.8332 | 3060.8287 | 2.12  | 0 | 114  | 1.3e-009 | 1 | R.M.A.G.T.G.A.V.S.F.D.A.G.T.F.E.V.F.G.A.L.L.N.G.A.L.Y.P.V.K.K                       |
| 8594  | 1531.8201 | 3060.8298 | 3060.8286 | 12.7  | 1 | (40) | 0.021    | 1 | R.G.Y.R.I.E.S.E.I.V.Q.L.A.Q.L.S.E.V.Q.D.A.A.V.T.A.V.K.D                             |
| 8615  | 1024.8294 | 3071.4574 | 3071.4513 | 2.01  | 0 | (73) | 1.3e-005 | 1 | K.Q.A.S.P.S.L.W.N.G.Y.G.P.T.E.N.T.T.F.S.F.S.F.L.D.R.E                               |
| 8642  | 1045.2473 | 3088.4801 | 3088.4778 | 0.73  | 0 | (98) | 8.6e-008 | 1 | K.Q.A.S.P.S.L.W.N.G.Y.G.P.T.E.N.T.T.F.S.F.S.F.L.D.R.E                               |
| 8644  | 1030.6028 | 3088.4869 | 3088.4778 | 2.81  | 0 | 107  | 5.8e-009 | 1 | K.Q.A.S.P.S.L.W.N.G.Y.G.P.T.E.N.T.T.F.S.F.S.F.L.D.R.E                               |
| 8683  | 1037.1984 | 3108.8733 | 3108.8624 | 3.50  | 0 | 38   | 0.048    | 1 | U K.T.L.S.Q.S.L.P.D.Y.M.F.A.H.L.G.M.D.N.L.P.T.N.G.K.I                               |
| 8690  | 778.8745  | 3111.4689 | 3111.4688 | 0.11  | 1 | 63   | 0.00015  | 1 | U K.G.E.Q.L.P.E.P.A.L.H.Y.D.F.A.V.W.G.N.E.A.E.Q.Q.E.R.M                             |
| 8691  | 1038.1848 | 3111.4718 | 3111.4688 | 1.04  | 1 | (52) | 0.0017   | 1 | U K.G.E.Q.L.P.E.P.A.L.H.Y.D.F.A.V.W.G.N.E.A.E.Q.Q.E.R.M                             |
| 8725  | 784.9388  | 3135.7190 | 3135.7195 | 0.80  | 1 | (33) | 0.048    | 1 | R.Q.L.S.L.T.L.P.S.H.M.I.P.F.F.V.Q.D.A.I.P.L.T.A.N.G.K.T                             |
| 8755  | 1051.5803 | 3151.7191 | 3151.7104 | 2.78  | 1 | 49   | 0.0014   | 1 | R.Q.L.S.L.T.L.P.S.H.M.I.P.F.F.V.Q.D.A.I.P.L.T.A.N.G.K.T                             |
| 8797  | 1068.8679 | 3173.5819 | 3173.5703 | 3.87  | 1 | 45   | 0.01     | 1 | R.Q.I.V.E.V.F.N.S.T.K.A.E.L.P.E.G.M.A.V.H.Q.V.F.E.E.Q.A.K.R                         |
| 8843  | 1896.3157 | 3188.8188 | 3188.8218 | -1.52 | 1 | (52) | 0.0023   | 1 | R.M.A.G.T.G.A.V.S.F.D.A.G.T.F.E.V.F.G.A.L.L.N.G.A.L.Y.P.V.K.K                       |
| 8845  | 1063.8840 | 3188.8303 | 3188.8216 | 2.71  | 1 | 92   | 1.9e-007 | 1 | R.M.A.G.T.G.A.V.S.F.D.A.G.T.F.E.V.F.G.A.L.L.N.G.A.L.Y.P.V.K.K                       |
| 8847  | 1064.2085 | 3189.5978 | 3189.6056 | -2.48 | 1 | (79) | 3.9e-008 | 1 | R.M.A.G.T.G.A.V.S.F.D.A.G.T.F.E.V.F.G.A.L.L.N.G.A.L.Y.P.V.K.K                       |
| 8850  | 838.8950  | 3189.8388 | 3189.8058 | 10.3  | 1 | (54) | 0.0012   | 1 | R.M.A.G.T.G.A.V.S.F.D.A.G.T.F.E.V.F.G.A.L.L.N.G.A.L.Y.P.V.K.K                       |
| 8875  | 1809.8441 | 3217.8737 | 3217.8733 | 0.12  | 1 | (55) | 0.00083  | 1 | K.S.A.L.K.E.T.L.P.D.Y.M.F.A.F.W.V.T.N.E.L.P.V.T.A.N.G.K.V                           |
| 9017  | 806.4241  | 3233.8674 | 3233.8682 | -0.25 | 1 | (44) | 0.012    | 1 | K.S.A.L.K.E.T.L.P.D.Y.M.F.A.F.W.V.T.N.E.L.P.V.T.A.N.G.K.V                           |
| 9022  | 1079.2324 | 3234.8754 | 3234.8822 | 7.18  | 1 | 57   | 0.00051  | 1 | K.S.A.L.K.E.T.L.P.D.Y.M.F.A.F.W.V.T.N.E.L.P.V.T.A.N.G.K.V                           |
| 9101  | 826.4412  | 3301.7355 | 3301.7405 | -1.51 | 2 | (81) | 2e-008   | 1 | R.G.Y.R.I.E.S.E.I.V.Q.L.A.Q.L.S.E.V.Q.D.A.A.V.T.A.V.K.D.G                           |
| 9104  | 828.6917  | 3302.7377 | 3302.7245 | 4.00  | 2 | 87   | 4.2e-007 | 1 | R.G.Y.R.I.E.S.E.I.V.Q.L.A.Q.L.S.E.V.Q.D.A.A.V.T.A.V.K.D.G                           |
| 9105  | 828.9483  | 3303.7921 | 3303.7085 | 13.2  | 2 | (40) | 0.021    | 1 | R.G.Y.R.I.E.S.E.I.V.Q.L.A.Q.L.S.E.V.Q.D.A.A.V.T.A.V.K.D.G                           |
| 9145  | 1108.2249 | 3315.8827 | 3315.8412 | 3.48  | 1 | 114  | 1.3e-009 | 1 | K.V.Q.A.S.P.S.L.W.N.G.Y.G.P.T.E.N.T.T.F.S.F.L.D.R.E                                 |
| 9255  | 1121.5829 | 3381.8888 | 3381.8506 | 4.80  | 1 | 40   | 0.039    | 1 | K.D.E.E.Y.L.D.V.F.K.G.P.L.D.P.A.D.F.E.R.P.A.E.R.S                                   |
| 9261  | 1124.5823 | 3370.7650 | 3370.7823 | 0.81  | 0 | 44   | 0.011    | 1 | K.T.V.L.S.Y.A.F.D.L.G.V.T.S.M.F.F.V.L.L.G.G.E.L.H.V.K.E                             |
| 9295  | 949.8528  | 3395.7815 | 3395.7912 | -2.88 | 1 | 39   | 0.028    | 1 | K.Q.L.S.L.T.L.P.S.H.M.I.P.F.F.V.Q.D.A.I.P.L.T.A.N.G.K.T.D.R.N                       |
| 9328  | 1715.2101 | 3428.4058 | 3428.4148 | -2.81 | 0 | 83   | 5.9e-008 | 1 | K.E.F.T.S.D.F.S.A.E.D.L.E.M.D.E.M.G.D.F.D.M.L.E.E.N.L.K.                            |
| 9329  | 1143.8120 | 3428.4142 | 3428.4148 | -0.11 | 0 | (48) | 0.00023  | 1 | K.E.F.T.S.D.F.S.A.E.D.L.E.M.D.E.M.G.D.F.D.M.L.E.E.N.L.K.                            |
| 9330  | 1143.8217 | 3428.4432 | 3428.4148 | 6.34  | 0 | (43) | 0.0013   | 1 | K.E.F.T.S.D.F.S.A.E.D.L.E.M.D.E.M.G.D.F.D.M.L.E.E.N.L.K.                            |
| 9345  | 1148.1478 | 3444.4209 | 3444.4095 | 3.32  | 0 | (38) | 0.0021   | 1 | K.E.F.T.S.D.F.S.A.E.D.L.E.M.D.E.M.G.D.F.D.M.L.E.E.N.L.K.                            |
| 9385  | 878.8859  | 3502.8347 | 3502.8310 | 1.05  | 0 | (46) | 0.008    | 1 | R.S.A.L.D.G.N.L.L.H.V.A.F.E.N.Y.P.L.D.Q.E.L.E.N.G.S.M.E.D.R.L                       |
| 9396  | 1168.5546 | 3502.8419 | 3502.8310 | 5.10  | 0 | (43) | 0.014    | 1 | R.S.A.L.D.G.N.L.L.H.V.A.F.E.N.Y.P.L.D.Q.E.L.E.N.G.S.M.E.D.R.L                       |
| 9398  | 1173.8870 | 3518.8391 | 3518.8259 | 3.72  | 0 | 54   | 0.00098  | 1 | R.S.A.L.D.G.N.L.L.H.V.A.F.E.N.Y.P.L.D.Q.E.L.E.N.G.S.M.E.D.R.L                       |
| 9402  | 880.9137  | 3519.8257 | 3519.8100 | 4.47  | 0 | (38) | 0.033    | 1 | R.S.A.L.D.G.N.L.L.H.V.A.F.E.N.Y.P.L.D.Q.E.L.E.N.G.S.M.E.D.R.L                       |
| 9404  | 1780.8239 | 3519.8331 | 3519.8100 | 8.59  | 0 | (47) | 0.0044   | 1 | R.S.A.L.D.G.N.L.L.H.V.A.F.E.N.Y.P.L.D.Q.E.L.E.N.G.S.M.E.D.R.L                       |
| 9563  | 727.9820  | 3834.7738 | 3834.7759 | -0.88 | 1 | (39) | 0.048    | 1 | R.Q.L.A.A.Y.M.E.A.S.A.V.S.G.G.H.V.L.K.P.A.D.K.D.M.Y.P.L.S.S.A.Q.K.R                 |
| 9572  | 810.9588  | 3838.8061 | 3838.8018 | 1.19  | 1 | (84) | 1.2e-008 | 1 | U K.V.L.F.E.P.T.Q.I.E.M.A.L.Y.L.E.E.N.S.K.E.E.Q.T.F.E.P.I.R.Q                       |
| 9576  | 1214.8110 | 3840.8111 | 3840.7858 | 0.94  | 1 | (49) | 0.0042   | 1 | U K.V.L.F.E.P.T.Q.I.E.M.A.L.Y.L.E.E.N.S.K.E.E.Q.T.F.E.P.I.R.Q                       |
| 9581  | 811.7124  | 3842.8205 | 3842.8185 | 1.08  | 0 | (71) | 3.2e-005 | 1 | K.K.P.Y.T.L.V.N.N.Y.G.P.T.E.N.T.V.A.T.S.A.E.H.P.E.E.G.S.L.S.I.G.R.A                 |
| 9582  | 729.5720  | 3842.8237 | 3842.8185 | 1.97  | 0 | (45) | 0.011    | 1 | K.K.P.Y.T.L.V.N.N.Y.G.P.T.E.N.T.V.A.T.S.A.E.H.P.E.E.G.S.L.S.I.G.R.A                 |
| 9583  | 1215.2849 | 3842.8329 | 3842.8185 | 4.49  | 0 | 78   | 5.5e-008 | 1 | K.K.P.Y.T.L.V.N.N.Y.G.P.T.E.N.T.V.A.T.S.A.E.H.P.E.E.G.S.L.S.I.G.R.A                 |
| 9587  | 811.9830  | 3843.8229 | 3843.8008 | 6.14  | 0 | (84) | 0.00014  | 1 | K.K.P.Y.T.L.V.N.N.Y.G.P.T.E.N.T.V.A.T.S.A.E.H.P.E.E.G.S.L.S.I.G.R.A                 |
| 9601  | 813.7011  | 3850.7781 | 3850.7708 | 1.18  | 1 | 48   | 0.0081   | 1 | R.Q.L.A.A.Y.M.E.A.S.A.V.S.G.G.H.V.L.K.P.A.D.K.D.M.Y.P.L.S.S.A.Q.K.R                 |
| 9607  | 814.9589  | 3855.7946 | 3855.7987 | -0.88 | 1 | 105  | 1.1e-008 | 1 | U K.V.L.F.E.P.T.Q.I.E.M.A.L.Y.L.E.E.N.S.K.E.E.Q.T.F.E.P.I.R.Q                       |
| 9610  | 1219.9457 | 3858.8152 | 3858.7807 | 9.44  | 1 | (75) | 1.1e-005 | 1 | U K.V.L.F.E.P.T.Q.I.E.M.A.L.Y.L.E.E.N.S.K.E.E.Q.T.F.E.P.I.R.Q                       |
| 9668  | 1232.2299 | 3893.8878 | 3893.8810 | 1.83  | 1 | 41   | 0.013    | 1 | K.G.F.T.F.E.I.S.F.N.Y.L.G.O.F.D.S.E.V.K.T.D.F.F.E.P.S.A.F.D.M.G.R.Q                 |
| 9800  | 1250.9479 | 3749.8218 | 3749.8134 | 2.23  | 0 | 55   | 0.0014   | 1 | R.L.N.D.Y.F.E.T.N.G.V.I.T.T.P.L.Q.A.E.Q.F.M.E.L.E.N.T.S.R.V                         |
| 9806  | 1273.1895 | 3816.8798 | 3816.8740 | 0.88  | 1 | 44   | 0.00047  | 1 | K.E.D.K.E.F.T.S.D.F.S.A.E.D.L.E.M.D.E.M.G.D.F.D.M.L.E.E.N.L.K.                      |
| 9972  | 1289.9888 | 3888.9388 | 3888.9135 | 6.80  | 1 | 41   | 0.028    | 1 | R.L.S.O.D.L.L.S.Q.S.A.H.L.L.E.E.R.H.M.T.Q.I.E.A.T.F.A.L.F.E.K.Q                     |
| 10018 | 1914.8512 | 3840.9919 | 3840.8271 | 1.22  | 0 | 46   | 0.0089   | 1 | K.D.W.A.E.L.A.F.S.Q.S.A.H.L.L.Q.G.A.E.Y.W.S.Q.A.A.E.Q.V.S.P.L.K.D                   |
| 10023 | 988.5003  | 3841.8721 | 3841.8687 | 3.40  | 2 | 48   | 0.0087   | 1 | U K.E.L.A.L.L.Y.G.E.Q.L.P.E.P.A.L.H.Y.D.F.A.V.W.G.N.E.A.E.Q.Q.E.R.M                 |
| 10089 | 1008.0206 | 4028.0839 | 4028.0354 | 4.60  | 0 | 70   | 3.5e-005 | 1 | K.Y.N.F.T.D.V.F.G.T.V.G.S.R.P.S.E.I.N.G.I.E.T.M.A.G.L.F.I.N.T.P.V.R.V               |
| 10107 | 1012.2824 | 4045.0205 | 4044.9826 | 14.3  | 1 | (58) | 0.00058  | 1 | R.N.F.L.F.N.V.M.Y.T.T.E.N.P.D.K.E.Q.L.T.Q.N.L.S.I.S.P.Y.E.A.H.Q.G.T.S.K.F           |
| 10113 | 1012.5146 | 4046.0290 | 4045.9893 | 7.59  | 0 | (45) | 0.013    | 1 | K.Y.N.F.T.D.V.F.G.T.V.G.S.R.P.S.E.I.N.G.I.E.T.M.A.G.L.F.I.N.T.P.V.R.V               |
| 10132 | 1015.7899 | 4058.9948 | 4058.9896 | 1.25  | 1 | (74) | 1.5e-005 | 1 | R.N.F.L.F.N.V.M.Y.T.T.E.N.P.D.K.E.Q.L.T.Q.N.L.S.I.S.P.Y.E.A.H.Q.G.T.S.K.F           |
| 10133 | 1854.3429 | 4080.0089 | 4080.9735 | 8.22  | 1 | 78   | 6.5e-008 | 1 | R.N.F.L.F.N.V.M.Y.T.T.E.N.P.D.K.E.Q.L.T.Q.N.L.S.I.S.P.Y.E.A.H.Q.G.T.S.K.F           |
| 10172 | 1032.2487 | 4124.9877 | 4124.9823 | -1.12 | 0 | 81   | 0.00024  | 1 | R.T.L.S.P.L.D.E.N.E.N.P.E.T.A.Y.E.N.L.A.Y.M.Y.T.S.O.T.T.G.O.P.K.G                   |
| 10176 | 1378.8648 | 4128.9725 | 4128.9303 | 10.2  | 0 | (65) | 0.0011   | 1 | R.T.L.S.P.L.D.E.N.E.N.P.E.T.A.Y.E.N.L.A.Y.M.Y.T.S.O.T.T.G.O.P.K.G                   |
| 10182 | 1098.2488 | 4140.9880 | 4140.9872 | 2.12  | 0 | (47) | 0.007    | 1 | R.T.L.S.P.L.D.E.N.E.N.P.E.T.A.Y.E.N.L.A.Y.M.Y.T.S.O.T.T.G.O.P.K.G                   |
| 10183 | 1381.3294 | 4140.9882 | 4140.9872 | 2.17  | 0 | (68) | 0.00078  | 1 | R.T.L.S.P.L.D.E.N.E.N.P.E.T.A.Y.E.N.L.A.Y.M.Y.T.S.O.T.T.G.O.P.K.G                   |
| 10188 | 829.3882  | 4141.9540 | 4141.9419 | 3.29  | 0 | (41) | 0.028    | 1 | R.T.L.S.P.L.D.E.N.E.N.P.E.T.A.Y.E.N.L.A.Y.M.Y.T.S.O.T.T.G.O.P.K.G                   |
| 10273 | 1448.0833 | 4341.1882 | 4341.1259 | 9.78  | 1 | (55) | 0.0012   | 1 | K.S.L.M.A.E.T.D.T.T.M.Y.F.L.L.A.A.F.N.L.L.S.K.Y.A.S.Q.D.D.I.V.G.S.P.T.A.G.R.T       |
| 10281 | 1483.7222 | 4368.1447 | 4368.1048 | 9.16  | 1 | 72   | 2.4e-005 | 1 | K.S.L.M.A.E.T.D.T.T.M.Y.F.L.L.A.A.F.N.L.L.S.K.Y.A.S.Q.D.D.I.V.G.S.P.T.A.G.R.T       |
| 10285 | 1094.0453 | 4372.1821 | 4372.1317 | 4.88  | 1 | (70) | 3.8e-005 | 1 | K.S.L.M.A.E.T.D.T.T.M.Y.F.L.L.A.A.F.N.L.L.S.K.Y.A.S.Q.D.D.I.V.G.S.P.T.A.G.R.T       |
| 10286 | 1488.3916 | 4372.1830 | 4372.1317 | 4.87  | 1 | (85) | 0.00012  | 1 | K.S.L.M.A.E.T.D.T.T.M.Y.F.L.L.A.A.F.N.L.L.S.K.Y.A.S.Q.D.D.I.V.G.S.P.T.A.G.R.T       |
| 10291 | 1484.7202 | 4381.1388 | 4381.1420 | -0.73 | 1 | 55   | 0.0013   | 1 | K.N.A.G.Y.V.P.T.E.E.D.R.M.A.G.T.G.A.V.S.F.D.A.G.T.F.E.V.F.G.A.L.L.N.G.A.L.Y.P.V.K.K |
| 10292 | 1098.7977 | 4381.1818 | 4381.1420 | 4.51  | 1 | (47) | 0.0088   | 1 | K.N.A.G.Y.V.P.T.E.E.D.R.M.A.G.T.G.A.V.S.F.D.A.G.T.F.E.V.F.G.A.L.L.N.G.A.L.Y.P.V.K.K |
| 10322 | 1190.6689 | 4618.2346 | 4618.2131 | 4.75  | 1 | (47) | 0.0088   | 1 | K.N.T.S.F.K.W.A.E.L.A.F.S.Q.S.A.H.L.L.Q.G.A.E.Y.W.S.Q.A.A.E.Q.V.S.P.L.K.D 10324     |
| 10326 | 1190.8200 | 4619.2506 | 4619.2370 | 3.06  | 2 | (42) | 0.025    | 1 | K.N.A.G.Y.V.P.T.E.E.D.R.M.A.G.T.G.A.V.S.F.D.A.G.T.F.E.V.F.G.A.L.L.N.G.A.L.Y.P.V.K.K |
| 10328 | 1807.7483 | 4620.2172 | 4620.1812 | 7.97  | 1 | 80   | 0.00042  | 1 | K.N.T.S.F.K.W.A.E.L.A.F.S.Q.S.A.H.L.L.Q.G.A.E.Y.W.S.Q.A.A.E.Q.V.S.P.L.K.D           |
| 10332 | 1131.3188 | 4621.2483 | 4621.2050 | 9.14  | 2 | 48   | 0.0054   | 1 | K.N.A.G.Y.V.P.T.E.E.D.R.M.A.G.T.G.A.V.S.F.D.A.G.T.F.E.V.F.G.A.L.L.N.G.A.L.Y.P.V.K.K |

2. [gi|674707898](#) non-ribosomal peptide synthetase [Bacillus subtilis]
3. [gi|727788222](#) non-ribosomal peptide synthetase [Bacillus subtilis]
4. [gi|827042897](#) non-ribosomal peptide synthetase [Bacillus subtilis]
5. [gi|895816705](#) non-ribosomal peptide synthetase [Bacillus subtilis]
6. [gi|18542182](#) ATP-dependent isoleucine adenylation [Bacillus subtilis]
7. [gi|874380654](#) non-ribosomal peptide synthetase [Bacillus subtilis]
8. [gi|499188883](#) MULTISPECIES: Surfactin synthase subunit 2 [Bacillus]
9. [gi|740842895](#) non-ribosomal peptide synthetase [Bacillus subtilis]
10. [gi|16292826](#) ATP-dependent isoleucine adenylation [Bacillus subtilis]
11. [gi|760325309](#) non-ribosomal peptide synthetase [Bacillus subtilis]
12. [gi|810425190](#) non-ribosomal peptide synthetase [Bacillus subtilis]
13. [gi|752706030](#) non-ribosomal peptide synthetase [Bacillus subtilis]
14. [gi|752704565](#) non-ribosomal peptide synthetase [Bacillus subtilis]
15. [gi|504288673](#) non-ribosomal peptide synthetase [Bacillus subtilis]
16. [gi|398482](#) srfA2 [Bacillus subtilis]
17. [gi|357258184](#) non-ribosomal peptide synthetase, partial [Bacillus subtilis]
18. [gi|860519617](#) non-ribosomal peptide synthetase, partial [Bacillus subtilis]
19. [gi|803878925](#) non-ribosomal peptide synthetase [Bacillus subtilis]
20. [gi|740841901](#) non-ribosomal peptide synthetase [Bacillus subtilis]
21. [gi|695808907](#) non-ribosomal peptide synthetase [Bacillus subtilis]
22. [gi|499188882](#) MULTISPECIES: Surfactin synthase subunit 1 [Bacillus]
23. [gi|915488337](#) non-ribosomal peptide synthetase [Bacillus subtilis]
24. [gi|754281220](#) non-ribosomal peptide synthetase [Bacillus subtilis]
25. [gi|505915452](#) non-ribosomal peptide synthetase [Bacillus subtilis]
26. [gi|398481](#) srfA1 [Bacillus subtilis]
27. [gi|674707697](#) non-ribosomal peptide synthetase [Bacillus subtilis]
28. [gi|757756185](#) non-ribosomal peptide synthetase [Bacillus subtilis]
29. [gi|874380653](#) non-ribosomal peptide synthetase [Bacillus subtilis]
- 30

34. [gi|695818613](#) non-ribosomal peptide synthetase, partial [Bacillus subtilis]

35. [gi|764654743](#) non-ribosomal peptide synthetase [Bacillus subtilis]

36. [gi|516292825](#) non-ribosomal peptide synthetase [Bacillus subtilis]

37. [gi|753213776](#) non-ribosomal peptide synthetase [Bacillus subtilis]

38. [gi|727789220](#) non-ribosomal peptide synthetase [Bacillus subtilis]

39. [gi|752689006](#) non-ribosomal peptide synthetase [Bacillus subtilis]

40. [gi|753212334](#) non-ribosomal peptide synthetase [Bacillus subtilis]

41. [gi|827042896](#) non-ribosomal peptide synthetase [Bacillus subtilis]

42. [gi|764674907](#) non-ribosomal peptide synthetase [Bacillus subtilis]

43. [gi|760325311](#) non-ribosomal peptide synthetase [Bacillus subtilis]

44. [gi|518543078](#) ATP-dependent isoleucine adenylyase, partial [Bacillus subtilis]

45. [gi|752705403](#) non-ribosomal peptide synthetase, partial [Bacillus subtilis]

46. [gi|657202728](#) non-ribosomal peptide synthetase, partial [Bacillus subtilis]

47. [gi|6339241916](#) non-ribosomal peptide synthetase, partial [Bacillus subtilis]

48. [gi|742326987](#) non-ribosomal peptide synthetase, partial [Bacillus subtilis]

49. [gi|753215568](#) non-ribosomal peptide synthetase [Bacillus subtilis]

50. [gi|764674904](#) non-ribosomal peptide synthetase [Bacillus subtilis]

51. [gi|764654741](#) non-ribosomal peptide synthetase [Bacillus subtilis]

52. [gi|773919036](#) non-ribosomal peptide synthetase [Bacillus subtilis]

53. [gi|760454014](#) Surfactin synthase subunit 1 [Bacillus subtilis]

54. [gi|768825197](#) peptide synthetase, partial [Bacillus subtilis]

55. [gi|518087235](#) non-ribosomal peptide synthetase, partial [Bacillus subtilis]

56. [gi|695818466](#) non-ribosomal peptide synthetase, partial [Bacillus subtilis]

57. [gi|4886972](#) recombinant surfactin/licherysin A synthetase [Bacillus subtilis]

58. [gi|443346037](#) surfactin synthetase subunit 2 SrfAB [Bacillus subtilis subsp. inaquosorum KCTC 13429]

59. [gi|623999290](#) Surfactin synthase subunit 2 [Bacillus subtilis]

60. [gi|695814150](#) non-ribosomal peptide synthetase, partial [Bacillus subtilis]

61. [gi|768825675](#) peptide synthetase, partial [Bacillus subtilis]

62. [gi|504282624](#) MULTISPECIES: non-ribosomal peptide synthetase [Bacillus subtilis group]

63. [gi|736713228](#) non-ribosomal peptide synthetase [Bacillus subtilis]

64. [gi|768826052](#) hypothetical protein UM89\_15610, partial [Bacillus subtilis]

65. [gi|320017752](#) plipastatin synthetase [Bacillus subtilis BSn5]

66. [gi|740642284](#) non-ribosomal peptide synthetase [Bacillus subtilis]

67. [gi|917518185](#) non-ribosomal peptide synthetase [Bacillus subtilis]

68. [gi|857228634](#) peptide synthetase [Bacillus subtilis]

69. [gi|917026198](#) non-ribosomal peptide synthetase [Bacillus subtilis]

70. [gi|504289870](#) non-ribosomal peptide synthetase [Bacillus subtilis]

71. [gi|819169245](#) non-ribosomal peptide synthetase [Bacillus subtilis]

72. [gi|825064565](#) peptide synthetase [Bacillus subtilis]

73. [gi|504292089](#) MULTISPECIES: hypothetical protein [Bacillus]

74. [gi|823999429](#) Surfactin synthase subunit 1 [Bacillus subtilis]

75. [gi|740678624](#) non-ribosomal peptide synthetase [Bacillus subtilis]

76. [gi|752704448](#) non-ribosomal peptide synthetase [Bacillus subtilis]

77. [gi|859925532](#) Long-chain-fatty-acid-CoA ligase [Bacillus subtilis E1]

78. [gi|727789361](#) polyketide synthase [Bacillus subtilis]

79. [gi|740642110](#) polyketide synthase [Bacillus subtilis]

80. [gi|727789763](#) non-ribosomal peptide synthetase [Bacillus subtilis]

81. [gi|505917300](#) polyketide synthase [Bacillus subtilis]

82. [gi|695807574](#) polyketide synthase [Bacillus subtilis]

83. [gi|504282623](#) MULTISPECIES: non-ribosomal peptide synthetase [Bacillus subtilis group]

84. [gi|839242420](#) polyketide synthase [Bacillus subtilis]

85. [gi|727789758](#) non-ribosomal peptide synthetase [Bacillus subtilis]

86. [gi|740642286](#) non-ribosomal peptide synthetase [Bacillus subtilis]

87. [gi|505064947](#) polyketide synthase [Bacillus subtilis]

88. [gi|624004027](#) Polyketide synthase PksR [Bacillus subtilis]

89. [gi|740642206](#) polyketide synthase [Bacillus subtilis]

90. [gi|638114238](#) hypothetical protein BSNT\_08422 [Bacillus subtilis subsp. natto BEST195]

91. [gi|751901523](#) Long-chain-fatty-acid-CoA ligase [Bacillus subtilis]

92. [gi|808340396](#) plipastatin synthetase [Bacillus subtilis HJ5]

93. [gi|753212572](#) non-ribosomal peptide synthetase [Bacillus subtilis]

94. [gi|740642208](#) polyketide synthase [Bacillus subtilis]

95. [gi|827043548](#) non-ribosomal peptide synthetase [Bacillus subtilis]

96. [gi|351468439](#) DNA-directed RNA polymerase subunit beta [Bacillus subtilis subsp. subtilis str. SC-8]

97. [gi|37577047](#) fengycin synthetase FenA [Bacillus subtilis]

98. [gi|740642428](#) integrase [Bacillus subtilis]

99. [gi|446490082](#) MULTISPECIES: DNA-directed RNA polymerase subunit beta' [Bacillus cereus group]

100. [gi|351470585](#) 2-oxoglutarate dehydrogenase E1 component [Bacillus subtilis subsp. subtilis str. SC-8]

101. [gi|740642207](#) polyketide synthase [Bacillus subtilis]

102. [gi|504290741](#) integrase [Bacillus subtilis]

103. [gi|74584702](#) non-ribosomal peptide synthase domain protein [Bacillus subtilis subsp. niger]

104. [gi|518088251](#) polyketide synthase [Bacillus subtilis]

105. [gi|695818224](#) polyketide synthase [Bacillus subtilis]

106. [gi|503155878](#) MULTISPECIES: non-ribosomal peptide synthetase [Bacillus subtilis group]

107. [gi|740677509](#) non-ribosomal peptide synthetase [Bacillus subtilis]

108. [gi|82502197](#) SubC [Bacillus subtilis]

109. [gi|489324284](#) MULTISPECIES: aconitate hydratase [Bacillus]

110. [gi|7469241](#) polyketide synthetase pksP [similarity] - Bacillus subtilis

111. [gi|489423080](#) MULTISPECIES: non-ribosomal peptide synthetase [Bacillus subtilis group]

112. [gi|763173615](#) hypothetical protein [Bacillus subtilis]

# Figure S16. MASCOT report for MS/MS analysis of gel excised SrfAA bands from the *B. subtilis* ATCC 21332 proteome.

Database : NCBIhr 20151028 (73478315 sequences; 26746207444 residues)  
 Taxonomy : *Bacillus subtilis* (127736 sequences)  
 Enzyme : Trypsin  
 Variable modifications : Deamidated (NQ),Gln->pyro-Glu (N-term Q),Oxidation (M),Acetyl (Protein N-term),Propionamide (C)  
 Mass values : Monocotopic  
 Protein Mass : Unrestricted  
 Peptide Mass Tolerance: ± 15 ppm  
 Fragment Mass Tolerance: ± 20 mmu  
 Max Missed Cleavages : 3  
 Instrument type : ESI-TRAP  
 Number of queries : 11938

Protein hits [g|740641901](#) non-ribosomal peptide synthetase [*Bacillus subtilis*]  
 1. [g|740641901](#) [Mass: 401919](#) [Score: 27604](#) [Matches: 685\(685\)](#) [Sequences: 245\(245\)](#) [emPAI: 30.35](#)  
 non-ribosomal peptide synthetase [*Bacillus subtilis*]

| Query | Observed | Mr(exp)   | Mr(calc)  | ppm   | Miss | Score | Expect   | Rank | Unique                                             | Peptide |
|-------|----------|-----------|-----------|-------|------|-------|----------|------|----------------------------------------------------|---------|
| 21    | 305.1952 | 608.3768  | 608.3768  | -0.07 | 0    | 33    | 0.0033   | 1    | <a href="#">KAHLLRI_20</a>                         |         |
| 95    | 329.2182 | 656.4218  | 656.4221  | -0.46 | 0    | 27    | 0.044    | 1    | <a href="#">RIANLJKQ</a>                           |         |
| 157   | 341.7486 | 681.4787  | 681.4788  | -0.31 | 0    | 34    | 0.0019   | 1    | <a href="#">KLVLPKCE</a>                           |         |
| 181   | 347.6922 | 693.3698  | 693.3697  | 0.07  | 0    | 32    | 0.038    | 1    | <a href="#">RTPDLAKA</a>                           |         |
| 213   | 358.7187 | 715.4228  | 715.4228  | -0.01 | 0    | 33    | 0.045    | 1    | <a href="#">KALGTGKCG</a>                          |         |
| 250   | 365.2345 | 728.4545  | 728.4545  | 0.05  | 0    | 35    | 0.024    | 1    | <a href="#">KVLTLGRK</a>                           |         |
| 273   | 366.7054 | 737.3902  | 737.3909  | 0.35  | 0    | 30    | 0.038    | 1    | <a href="#">RTTFEIKD</a>                           |         |
| 357   | 381.6698 | 761.3850  | 761.3854  | -0.53 | 0    | 35    | 0.04     | 1    | <a href="#">KGIQMSRL</a>                           |         |
| 396   | 388.2009 | 774.3872  | 774.3872  | 0.03  | 0    | 36    | 0.038    | 1    | <a href="#">KQETIERW</a>                           |         |
| 428   | 397.2281 | 792.4417  | 792.4415  | 0.22  | 0    | 40    | 0.0089   | 1    | <a href="#">KAMTLTKI</a>                           |         |
| 490   | 401.7371 | 801.4596  | 801.4596  | 0.00  | 0    | 43    | 0.0098   | 1    | <a href="#">R.VLLTGGDKL</a>                        |         |
| 487   | 402.7400 | 803.4654  | 803.4654  | 0.01  | 0    | 42    | 0.0088   | 1    | <a href="#">RAFQGLRR</a>                           |         |
| 641   | 421.2204 | 840.4283  | 840.4276  | -1.53 | 0    | (41)  | 0.0054   | 1    | <a href="#">KGVMEHRQ</a>                           |         |
| 688   | 424.7390 | 847.4555  | 847.4552  | 0.34  | 0    | 37    | 0.03     | 1    | <a href="#">R.GVSYVAPRLN</a>                       |         |
| 716   | 429.2186 | 856.4228  | 856.4225  | 0.15  | 0    | 45    | 0.0023   | 1    | <a href="#">KGVMEHRQ</a>                           |         |
| 759   | 437.2431 | 872.4716  | 872.4716  | 0.02  | 1    | 52    | 0.00094  | 1    | <a href="#">KLDAGVDRLL</a>                         |         |
| 788   | 446.2015 | 890.3883  | 890.3882  | 0.12  | 0    | 31    | 0.044    | 1    | <a href="#">KEWTFQDRV</a>                          |         |
| 843   | 459.7213 | 917.4281  | 917.4277  | 0.51  | 1    | (37)  | 0.014    | 1    | <a href="#">KQMKEDIRH</a>                          |         |
| 849   | 307.1605 | 918.4596  | 918.4593  | 0.40  | 1    | (43)  | 0.0064   | 1    | <a href="#">KQMKEDIRH</a>                          |         |
| 950   | 460.2379 | 918.4613  | 918.4593  | 2.19  | 1    | 45    | 0.0047   | 1    | <a href="#">KQMKEDIRH</a>                          |         |
| 982   | 461.7351 | 921.4557  | 921.4556  | 0.09  | 0    | 42    | 0.0074   | 1    | <a href="#">RLQDFANSKA</a>                         |         |
| 984   | 462.2287 | 922.4387  | 922.4396  | -0.91 | 0    | (39)  | 0.013    | 1    | <a href="#">RLQDFANSKA</a>                         |         |
| 1006  | 464.2486 | 926.4824  | 926.4821  | 0.34  | 0    | 49    | 0.00077  | 1    | <a href="#">K.GEQLPDRL</a>                         |         |
| 1045  | 467.7370 | 933.4595  | 933.4590  | 0.59  | 0    | 52    | 0.00074  | 1    | <a href="#">KETVLDMARL</a>                         |         |
| 1049  | 468.2636 | 934.5126  | 934.5124  | 0.20  | 0    | 56    | 0.0002   | 1    | <a href="#">RIAFSLAOKA</a>                         |         |
| 1072  | 469.2505 | 936.4885  | 936.4851  | 1.54  | 1    | (33)  | 0.049    | 1    | <a href="#">RKIMFQGERA</a>                         |         |
| 1075  | 469.7402 | 937.4688  | 937.4687  | 0.11  | 1    | 33    | 0.044    | 1    | <a href="#">KIDQYVWKE</a>                          |         |
| 1184  | 474.2995 | 946.5845  | 946.5851  | -0.68 | 1    | 44    | 0.00089  | 1    | <a href="#">RKLFALEVKA</a>                         |         |
| 1185  | 316.5357 | 946.5853  | 946.5851  | 0.18  | 1    | (27)  | 0.045    | 1    | <a href="#">RKLFALEVKA</a>                         |         |
| 1189  | 475.2579 | 946.5013  | 946.5029  | -1.68 | 0    | 50    | 0.0019   | 1    | <a href="#">K.FDLTVQARE_1180</a>                   |         |
| 1207  | 477.2469 | 952.4793  | 952.4800  | -0.77 | 1    | 38    | 0.014    | 1    | <a href="#">RKQIFQGERA</a>                         |         |
| 1247  | 479.2794 | 956.5442  | 956.5443  | -0.10 | 0    | 40    | 0.0088   | 1    | <a href="#">KQALLQAWKQ</a>                         |         |
| 1253  | 479.7633 | 957.4920  | 957.4920  | 0.03  | 0    | 34    | 0.03     | 1    | <a href="#">R.YLTFAPHEKE</a>                       |         |
| 1447  | 494.7688 | 987.4990  | 987.4985  | 0.47  | 1    | 72    | 7.8e-008 | 1    | <a href="#">REDDQVYKRG</a>                         |         |
| 1500  | 801.2929 | 1000.5713 | 1000.5706 | 0.77  | 0    | 58    | 0.00028  | 1    | <a href="#">KIDQLPLRLI</a>                         |         |
| 1527  | 904.2884 | 1006.4962 | 1006.4971 | 1.11  | 0    | 54    | 0.00055  | 1    | <a href="#">K.KALAEAEFKG</a>                       |         |
| 1620  | 915.2883 | 1028.5820 | 1028.5814 | 0.53  | 0    | 58    | 0.00018  | 1    | <a href="#">R.GILSLGAGEGRLT</a>                    |         |
| 1633  | 916.2722 | 1030.5299 | 1030.5295 | 0.41  | 0    | 49    | 0.0019   | 1    | <a href="#">K.GTASISPAEKQ</a>                      |         |
| 1634  | 916.2723 | 1030.5301 | 1030.5295 | 0.63  | 0    | 55    | 0.0005   | 1    | <a href="#">R.LTGLDVERL_1632</a>                   |         |
| 1669  | 821.7645 | 1041.5144 | 1041.5131 | 1.23  | 0    | 38    | 0.012    | 1    | <a href="#">KLTIDFDYLT</a>                         |         |
| 1679  | 822.3288 | 1042.6390 | 1042.6398 | 0.35  | 1    | 40    | 0.0088   | 1    | <a href="#">R.VLLTGGDKLKR</a>                      |         |
| 1784  | 835.2802 | 1088.5457 | 1088.5451 | 0.59  | 0    | (82)  | 4.8e-005 | 1    | <a href="#">R.QLEEQVAANKL</a>                      |         |
| 1851  | 543.7929 | 1085.5713 | 1085.5717 | -0.38 | 0    | 70    | 9.3e-008 | 1    | <a href="#">R.QLEEQVAANKL</a>                      |         |
| 1864  | 363.8731 | 1088.5976 | 1088.5976 | -0.21 | 1    | 56    | 0.00044  | 1    | <a href="#">KLPKEAGTAPRL</a>                       |         |
| 1865  | 545.3064 | 1088.5982 | 1088.5976 | 0.39  | 1    | (55)  | 0.00054  | 1    | <a href="#">KLPKEAGTAPRL</a>                       |         |
| 1870  | 545.8221 | 1089.6297 | 1089.6290 | 0.68  | 0    | (37)  | 0.013    | 1    | <a href="#">R.MITAMGILKA</a>                       |         |
| 1877  | 547.2849 | 1092.5553 | 1092.5584 | -1.00 | 0    | 80    | 0.00016  | 1    | <a href="#">KAVSGTAYTAPRLN</a>                     |         |
| 1925  | 553.6192 | 1105.6237 | 1105.6239 | -0.14 | 0    | (34)  | 0.041    | 1    | <a href="#">R.MITAMGILKA</a>                       |         |
| 1953  | 557.3184 | 1112.6183 | 1112.6186 | -0.61 | 0    | 63    | 3.8e-005 | 1    | <a href="#">R.IQLGLEENRHL</a>                      |         |
| 1973  | 559.2871 | 1116.5797 | 1116.5798 | 0.78  | 0    | 47    | 0.0031   | 1    | <a href="#">R.VNVHLEGHORLE</a>                     |         |
| 1992  | 961.6167 | 1121.6189 | 1121.6186 | 0.04  | 0    | 42    | 0.0047   | 1    | <a href="#">R.MITAMGILKA</a>                       |         |
| 2049  | 569.7827 | 1137.5708 | 1137.5708 | 0.13  | 0    | 44    | 0.0048   | 1    | <a href="#">K.QFQSELYCK</a>                        |         |
| 2090  | 574.2704 | 1146.6282 | 1146.6285 | -0.24 | 0    | 82    | 4.9e-007 | 1    | <a href="#">R.NASAGGSLDAERLF</a>                   |         |
| 2094  | 574.7828 | 1147.5110 | 1147.5106 | 0.40  | 0    | (57)  | 1.1e-005 | 1    | <a href="#">R.NASAGGSLDAERF_2093</a>               |         |
| 2108  | 578.8218 | 1151.6291 | 1151.6299 | -0.63 | 0    | 40    | 0.0072   | 1    | <a href="#">RALPFPDANVSR.G</a>                     |         |
| 2123  | 578.3089 | 1154.6982 | 1154.6972 | 1.78  | 0    | (37)  | 0.018    | 1    | <a href="#">K.QFQSELYCK</a>                        |         |
| 2135  | 580.2883 | 1158.5581 | 1158.5557 | 2.04  | 0    | 40    | 0.0078   | 1    | <a href="#">K.VTQTESSEKVA_2134</a>                 |         |
| 2138  | 580.2911 | 1158.5677 | 1158.5689 | 0.69  | 0    | 58    | 0.00023  | 1    | <a href="#">K.HADDLYGQLKQ</a>                      |         |
| 2266  | 300.6520 | 1198.7389 | 1198.7397 | -0.74 | 2    | 58    | 0.00011  | 1    | <a href="#">R.VLLTGGDKLKR</a>                      |         |
| 2267  | 400.5872 | 1198.7387 | 1198.7387 | -0.08 | 2    | (53)  | 0.00023  | 1    | <a href="#">R.VLLTGGDKLKR</a>                      |         |
| 2268  | 900.3774 | 1198.7403 | 1198.7397 | 0.49  | 2    | (54)  | 0.00017  | 1    | <a href="#">R.VLLTGGDKLKR</a>                      |         |
| 2305  | 403.2351 | 1206.6938 | 1206.6933 | 0.25  | 0    | (38)  | 0.011    | 1    | <a href="#">K.GNIVTHANILRT</a>                     |         |
| 2306  | 904.3497 | 1206.6948 | 1206.6933 | 1.24  | 0    | 51    | 0.00061  | 1    | <a href="#">K.GNIVTHANILRT</a>                     |         |
| 2309  | 904.3582 | 1206.7019 | 1206.7012 | 0.54  | 0    | 38    | 0.012    | 1    | <a href="#">R.VSFEHPKPKI</a>                       |         |
| 2312  | 904.8070 | 1207.5993 | 1207.5986 | 0.64  | 0    | 78    | 3.4e-008 | 1    | <a href="#">K.WTGGGIVGRI_2313</a>                  |         |
| 2323  | 404.1877 | 1209.5414 | 1209.5414 | -0.03 | 0    | 53    | 0.00028  | 1    | <a href="#">K.THSFAEYERLL</a>                      |         |
| 2324  | 905.7784 | 1209.5423 | 1209.5414 | 0.74  | 0    | (35)  | 0.019    | 1    | <a href="#">K.THSFAEYERLL</a>                      |         |
| 2380  | 613.2879 | 1224.5811 | 1224.5809 | 0.24  | 0    | (49)  | 0.0012   | 1    | <a href="#">R.SDEAMASVRLT</a>                      |         |
| 2431  | 617.3174 | 1232.6203 | 1232.6190 | 1.09  | 0    | 57    | 0.0003   | 1    | <a href="#">R.FVADPVPGERLM</a>                     |         |
| 2451  | 618.8281 | 1235.6416 | 1235.6397 | 1.48  | 0    | 62    | 0.00012  | 1    | <a href="#">R.IEVLQDSGAKL</a>                      |         |
| 2476  | 821.2863 | 1240.6781 | 1240.6758 | 0.30  | 0    | 58    | 0.00013  | 1    | <a href="#">R.SDEAMASVRLT</a>                      |         |
| 2512  | 416.8891 | 1247.6754 | 1247.6781 | -0.55 | 1    | 66    | 3.5e-005 | 1    | <a href="#">K.KALAEAEAEFKG</a>                     |         |
| 2513  | 824.8484 | 1247.6782 | 1247.6781 | 1.87  | 1    | (42)  | 0.0085   | 1    | <a href="#">K.KALAEAEAEFKG</a>                     |         |
| 2524  | 825.8228 | 1249.6309 | 1249.6303 | 0.55  | 0    | 60    | 0.00019  | 1    | <a href="#">R.TSFLVNSTPRQ</a>                      |         |
| 2578  | 831.3883 | 1280.7181 | 1280.7190 | -0.71 | 1    | 69    | 1.3e-005 | 1    | <a href="#">K.IAKFDLTVQARE_2584</a>                |         |
| 2586  | 421.2473 | 1280.7200 | 1280.7190 | 0.80  | 1    | (57)  | 1.9e-005 | 1    | <a href="#">K.IAKFDLTVQARE_2580_2581_2583_2585</a> |         |
| 2719  | 942.3833 | 1282.6921 | 1282.6921 | 0.00  | 1    | 40    | 0.009    | 1    | <a href="#">K.QFQSELYCKQ</a>                       |         |
| 2761  | 945.8280 | 1289.6414 | 1289.6405 | 0.77  | 0    | 57    | 0.00027  | 1    | <a href="#">K.FLQDPFVPGDRM_2762</a>                |         |
| 2790  | 948.3182 | 1294.6158 | 1294.6153 | 0.40  | 1    | 50    | 0.0012   | 1    | <a href="#">R.GYLVNREDAKLR</a>                     |         |
| 2832  | 435.2183 | 1302.6272 | 1302.6276 | -0.32 | 1    | 65    | 3.8e-005 | 1    | <a href="#">K.RNASAGGSLDAERLF</a>                  |         |
| 2845  | 653.3376 | 1304.6810 | 1304.6812 | -0.17 | 0    | 50    | 0.0015   | 1    | <a href="#">K.LYDGETLEPLRI</a>                     |         |
| 2881  | 954.8729 | 1307.7313 | 1307.7310 | 0.25  | 1    | 45    | 0.0021   | 1    | <a href="#">R.RALPDPDANVSR.G</a>                   |         |
| 2919  | 980.3319 | 1318.8491 | 1318.8517 | -1.56 | 0    | (78)  | 2.3e-008 | 1    | <a href="#">K.QNETTQLISR.V</a>                     |         |
| 2939  | 961.6459 | 1321.6772 | 1321.6779 | -0.49 | 0    | 46    | 0.0034   | 1    | <a href="#">K.GIQLPHEPKR</a>                       |         |
| 2941  | 441.6589 | 1321.6790 | 1321.6779 | 0.82  | 0    | (34)  | 0.048    | 1    | <a href="#">K.GIQLPHEPKR</a>                       |         |
| 2992  | 986.3682 | 1330.7238 | 1330.7245 | -0.47 | 1    | 75    | 4.3e-006 | 1    | <a href="#">R.IYKGGQLPDLRL</a>                     |         |
| 2993  | 444.5823 | 1330.7250 | 1330.7245 | 0.41  | 1    | (69)  | 0.00017  | 1    | <a href="#">R.IYKGGQLPDLRL</a>                     |         |
| 3007  | 967.3889 | 1332.7692 | 1332.7686 | 0.38  | 0    | 72    | 5.5e-008 | 1    | <a href="#">R.VIOMFVNTLALRT_3006</a>               |         |
| 3008  | 445.2805 | 1332.7697 | 1332.7686 | 0.67  | 0    | (49)  | 0.001    | 1    | <a href="#">R.VIOMFVNTLALRT</a>                    |         |
| 3019  | 988.8475 | 1335.8606 | 1335.8593 | 1.58  | 0    | 107   | 3.6e-009 | 1    | <a href="#">K.QNETTQLISR.V</a>                     |         |
| 3069  | 674.3475 | 1346.6905 | 1346.6799 | 0.48  | 0    | 79    | 2.3e-006 | 1    | <a href="#">R.LNSVMQQLMQRH</a>                     |         |
| 3082  | 675.3813 | 1346.7489 | 1346.7397 | -4.20 | 0    | (84)  | 3.3e-006 | 1    | <a href="#">R.VIOMFVNTLALRT_3084</a>               |         |
| 3083  | 450.5920 | 1346.7543 | 1346.7537 | 0.44  | 0    | (48)  | 0.0018   | 1    | <a href="#">R.VIOMFVNTLALRT</a>                    |         |
| 3086  | 675.6180 | 1346.8214 | 1346.8211 | 0.21  | 0    | 49    | 0.0012   | 1    | <a href="#">REGQEDVIQYR.G</a>                      |         |
| 3091  | 675.8341 | 1346.8935 | 1346.8937 | -0.10 | 0    | 40    | 0.015    | 1    | <a href="#">K.DMTPELFOEKA</a>                      |         |
| 3163  | 952.3444 | 1362.6742 | 1362.6748 | -0.44 | 0    | (66)  | 4.6e-005 | 1    | <a href="#">R.LNSVMQQLMQRH</a>                     |         |
| 3165  | 952.3485 | 1362.6794 | 1362.6748 | 2.70  | 0    | (53)  | 0.00082  | 1    | <a href="#">R.LNSVMQQLMQRH</a>                     |         |
| 3176  | 953.8319 | 1365.8491 | 1365.8486 | 0.40  | 0    | (37)  | 0.028    | 1    | <a href="#">K.DMTPELFOEKA</a>                      |         |
| 3228  | 888.3774 | 1374.7403 | 1374.7395 | 0.82  | 0    | 54    | 0.00048  | 1    | <a href="#">K.QFESPELVSLKR</a>                     |         |
| 3246  | 460.5641 | 1378.6704 | 1378.6697 | 0.48  | 0    | (43)  | 0.0078   | 1    | <a href="#">R.LNSVMQQLMQRH</a>                     |         |
| 3252  | 890.8341 | 1379.6837 | 1379.6837 | -0.02 | 0    | (38)  | 0.023    | 1    | <a href="#">R.LNSVMQQLMQRH</a>                     |         |
| 3334  | 997.3785 | 1392.7424 | 1392.7401 | 1.65  | 0    |       |          |      |                                                    |         |

|      |          |           |           |       |   |      |          |   |                                      |
|------|----------|-----------|-----------|-------|---|------|----------|---|--------------------------------------|
| 3388 | 700.8824 | 1399.7103 | 1399.7096 | 0.53  | 0 | 78   | 3.9e-008 | 1 | K.VTNGAALTAYYRK                      |
| 3390 | 703.3876 | 1404.7008 | 1404.6997 | 0.85  | 1 | 53   | 0.00085  | 1 | K.QDTPVSSPQKRM                       |
| 3404 | 704.3816 | 1406.7886 | 1406.7789 | -5.85 | 1 | (48) | 0.0018   | 1 | R.QLEEQVAANKPKD                      |
| 3414 | 470.2890 | 1407.7731 | 1407.7722 | 0.88  | 0 | (89) | 2.8e-005 | 1 | K.GVGPDSFVAVLIER.S                   |
| 3416 | 704.8846 | 1407.7747 | 1407.7722 | 1.82  | 0 | 79   | 1.1e-008 | 1 | K.GVGPDSFVAVLIER.S 3413 3415         |
| 3455 | 708.8870 | 1415.7212 | 1415.7197 | 1.01  | 0 | 88   | 2.8e-005 | 1 | R.WLPNGDIEFGRJ 3453 3454 3456 3457   |
| 3465 | 709.3592 | 1416.7039 | 1416.7036 | 0.14  | 0 | (98) | 0.00039  | 1 | R.WLPNGDIEFGRJ                       |
| 3477 | 710.3879 | 1418.7212 | 1418.7194 | 1.24  | 0 | 66   | 0.00043  | 1 | R.WLPDGTIEYGR.E                      |
| 3478 | 710.4015 | 1418.7894 | 1418.7877 | 0.53  | 0 | (54) | 0.00038  | 1 | R.SMDMVSILAVLKS                      |
| 3500 | 712.9091 | 1423.8038 | 1423.8034 | 0.09  | 1 | 78   | 1.9e-008 | 1 | R.QLEEQVAANKPKD                      |
| 3501 | 475.6096 | 1423.8040 | 1423.8034 | 0.40  | 1 | (50) | 0.00064  | 1 | R.QLEEQVAANKPKD                      |
| 3517 | 478.9173 | 1427.7300 | 1427.7298 | 0.28  | 0 | (39) | 0.017    | 1 | R.GYLHLPLETEKF                       |
| 3518 | 714.8729 | 1427.7313 | 1427.7298 | 1.17  | 0 | 42   | 0.0078   | 1 | R.GYLHLPLETEKF                       |
| 3567 | 479.2862 | 1434.7828 | 1434.7826 | 0.17  | 0 | (54) | 0.00047  | 1 | R.SMDMVSILAVLKS                      |
| 3568 | 479.2884 | 1434.7833 | 1434.7826 | 0.48  | 0 | (41) | 0.0094   | 1 | R.SMDMVSILAVLKS                      |
| 3569 | 718.3980 | 1434.7835 | 1434.7828 | 0.87  | 0 | (97) | 1.9e-005 | 1 | R.SMDMVSILAVLKS                      |
| 3570 | 718.3995 | 1434.7844 | 1434.7828 | 1.27  | 0 | (38) | 0.015    | 1 | R.SMDMVSILAVLKS                      |
| 3592 | 481.2539 | 1440.7369 | 1440.7401 | -0.18 | 1 | (35) | 0.046    | 1 | R.IQKYDYAVWQK.G                      |
| 3593 | 721.3774 | 1440.7403 | 1440.7401 | 0.14  | 1 | 41   | 0.013    | 1 | R.IQKYDYAVWQK.G                      |
| 3641 | 726.3858 | 1450.7171 | 1450.7184 | 0.49  | 2 | 70   | 1.8e-005 | 1 | R.GYLNREDIETKRF                      |
| 3645 | 484.8598 | 1450.7779 | 1450.7775 | 0.27  | 0 | (37) | 0.023    | 1 | R.SMDMVSILAVLKS                      |
| 3646 | 726.3982 | 1450.7779 | 1450.7775 | 0.29  | 0 | 79   | 1.4e-008 | 1 | R.SMDMVSILAVLKS 3648                 |
| 3652 | 726.8858 | 1451.7170 | 1451.7157 | 0.89  | 0 | (44) | 0.0089   | 1 | K.QEYHPLSLAQGR.T                     |
| 3690 | 729.8895 | 1457.7245 | 1457.7283 | -1.25 | 0 | (37) | 0.024    | 1 | K.VTNGAALTAYYRK                      |
| 3691 | 486.9184 | 1457.7274 | 1457.7283 | 0.78  | 0 | 54   | 0.00081  | 1 | K.VTNGAALTAYYRK                      |
| 3711 | 487.9403 | 1460.7992 | 1460.7987 | 0.34  | 1 | 71   | 1.1e-008 | 1 | R.IAFSLGAKADALR.R                    |
| 3712 | 731.4070 | 1460.7995 | 1460.7987 | 0.57  | 1 | (97) | 2.3e-005 | 1 | R.IAFSLGAKADALR.R                    |
| 3749 | 490.5880 | 1468.7423 | 1468.7422 | 0.03  | 0 | 50   | 0.0013   | 1 | K.QEYHPLSLAQGR.T                     |
| 3750 | 735.3792 | 1468.7439 | 1468.7422 | 1.10  | 0 | (38) | 0.021    | 1 | K.QEYHPLSLAQGR.T                     |
| 3782 | 739.3812 | 1476.7478 | 1476.7489 | 0.58  | 0 | (48) | 0.0045   | 1 | K.QMLGMFVSTVPLR.T                    |
| 3786 | 739.8872 | 1477.7799 | 1477.7785 | 0.92  | 0 | 80   | 1.4e-008 | 1 | K.QMLGMFVSTVPLR.T                    |
| 3862 | 486.9214 | 1483.7423 | 1483.7436 | -0.82 | 1 | (41) | 0.014    | 1 | R.KDIMPFLFOEKA                       |
| 3863 | 747.8795 | 1483.7425 | 1483.7259 | 11.2  | 0 | (48) | 0.0027   | 1 | K.QMLGMFVSTVPLR.T                    |
| 3864 | 747.8794 | 1483.7442 | 1483.7436 | 0.45  | 1 | 51   | 0.0015   | 1 | R.KDIMPFLFOEKA                       |
| 3867 | 747.8847 | 1483.7749 | 1483.7735 | 0.85  | 0 | (99) | 2.9e-005 | 1 | K.QMLGMFVSTVPLR.T                    |
| 3896 | 750.9174 | 1489.8203 | 1489.8195 | 0.52  | 0 | 78   | 3.5e-008 | 1 | R.QSSIDLOEGGLJKA 3894 3895 3896 3899 |
| 3897 | 800.9476 | 1489.8209 | 1489.8195 | 0.82  | 0 | (41) | 0.012    | 1 | R.QSSIDLOEGGLJKA                     |
| 3941 | 803.9146 | 1508.7221 | 1508.7219 | 0.12  | 1 | (71) | 1.3e-005 | 1 | R.NASAGSGLDAERFSK.D                  |
| 3942 | 755.3887 | 1508.7229 | 1508.7219 | 0.84  | 1 | 74   | 6.5e-008 | 1 | R.NASAGSGLDAERFSK.D                  |
| 3945 | 755.8917 | 1509.7899 | 1509.7894 | 0.34  | 0 | (59) | 0.00021  | 1 | K.QMLGMFVSTVPLR.T                    |
| 3949 | 804.2640 | 1509.7702 | 1509.7694 | 1.21  | 0 | (43) | 0.0085   | 1 | K.QMLGMFVSTVPLR.T                    |
| 3952 | 804.5807 | 1510.7202 | 1510.7198 | 0.22  | 1 | (45) | 0.0043   | 1 | R.GGSDIEMASVPR.T                     |
| 3953 | 788.3877 | 1510.7209 | 1510.7198 | 0.73  | 1 | 55   | 0.00047  | 1 | R.GGSDIEMASVPR.T                     |
| 3956 | 788.8709 | 1511.7271 | 1511.7269 | 1.00  | 0 | 72   | 9.8e-008 | 1 | R.TNDGQAFSEPK.D                      |
| 3961 | 805.2580 | 1512.7482 | 1512.7480 | 0.13  | 1 | 38   | 0.027    | 1 | K.GEKTADYLAWEKE                      |
| 3962 | 757.3812 | 1512.7479 | 1512.7480 | 1.28  | 1 | (38) | 0.035    | 1 | K.GEKTADYLAWEKE                      |
| 3972 | 805.9399 | 1514.7979 | 1514.7954 | 1.88  | 1 | 43   | 0.0081   | 1 | K.GSADRLTHFARL                       |
| 3978 | 379.9810 | 1515.8148 | 1515.8158 | -0.84 | 0 | (48) | 0.0046   | 1 | K.TLQALIEHDALR.M                     |
| 3979 | 768.9153 | 1515.8160 | 1515.8158 | 0.17  | 0 | 81   | 1.4e-008 | 1 | K.TLQALIEHDALR.M                     |
| 3981 | 806.2794 | 1515.8163 | 1515.8158 | 0.39  | 0 | (75) | 4.7e-008 | 1 | K.TLQALIEHDALR.M 3976                |
| 3987 | 806.6113 | 1516.8122 | 1516.7998 | 8.18  | 0 | (75) | 5.8e-008 | 1 | K.TLQALIEHDALR.M                     |
| 4026 | 806.8564 | 1522.7843 | 1522.7827 | 1.01  | 1 | (52) | 0.0011   | 1 | R.TTFEKDQETVQR.I 4025                |
| 4027 | 762.3906 | 1522.7867 | 1522.7827 | 2.81  | 1 | 70   | 2.1e-005 | 1 | R.TTFEKDQETVQR.I 4022                |
| 4058 | 784.9098 | 1527.8047 | 1527.8045 | 0.10  | 1 | 71   | 1e-005   | 1 | K.KVTNGAALTAYYRK                     |
| 4063 | 785.4045 | 1528.7945 | 1528.7885 | 3.82  | 1 | (97) | 3.2e-005 | 1 | K.KVTNGAALTAYYRK                     |
| 4075 | 786.4283 | 1530.8421 | 1530.8406 | 1.01  | 1 | 59   | 0.00018  | 1 | K.QFESVPELVSLKRN                     |
| 4076 | 511.2883 | 1530.8432 | 1530.8406 | 1.89  | 1 | (41) | 0.01     | 1 | K.QFESVPELVSLKRN                     |
| 4139 | 773.9080 | 1545.8014 | 1545.8014 | 0.00  | 0 | 87   | 3.3e-005 | 1 | R.MALLAPPHFASVK.Q                    |
| 4140 | 516.2749 | 1545.8029 | 1545.8014 | 0.98  | 0 | (42) | 0.012    | 1 | R.MALLAPPHFASVK.Q                    |
| 4171 | 778.8872 | 1555.7897 | 1555.7892 | 0.34  | 0 | (54) | 0.00087  | 1 | -MEITFPLTDAQR.J                      |
| 4174 | 519.8001 | 1555.7785 | 1555.7783 | 0.11  | 1 | (54) | 0.00088  | 1 | R.LQKYDYAVWQSR.Q                     |
| 4175 | 778.8881 | 1555.7817 | 1555.7783 | 2.19  | 1 | 87   | 3e-005   | 1 | R.LQKYDYAVWQSR.Q                     |
| 4187 | 821.8083 | 1561.7971 | 1561.7983 | 0.65  | 0 | (41) | 0.013    | 1 | R.MALLAPPHFASVK.Q                    |
| 4188 | 781.9072 | 1561.7999 | 1561.7983 | 2.32  | 0 | (99) | 4.5e-005 | 1 | R.MALLAPPHFASVK.Q                    |
| 4219 | 823.9594 | 1568.8864 | 1568.8882 | 0.12  | 0 | (41) | 0.011    | 1 | K.AJAWQDVLNVEKA 4221                 |
| 4220 | 785.4383 | 1568.8891 | 1568.8892 | 1.22  | 0 | 71   | 1.2e-005 | 1 | K.AJAWQDVLNVEKA 4221                 |
| 4231 | 788.8849 | 1571.7852 | 1571.7841 | 0.70  | 0 | 54   | 0.00053  | 1 | -MEITFPLTDAQR.J                      |
| 4250 | 788.3820 | 1574.7494 | 1574.7484 | 1.89  | 0 | 80   | 0.00018  | 1 | K.ALPEIDIEAGSGEYKA                   |
| 4288 | 828.6181 | 1582.8325 | 1582.8315 | 0.82  | 0 | (97) | 3.2e-007 | 1 | K.ISGQDDIVGSPVAGR.S                  |
| 4290 | 792.4238 | 1582.8331 | 1582.8315 | 1.02  | 0 | 99   | 2.2e-008 | 1 | K.ISGQDDIVGSPVAGR.S 4291             |
| 4249 | 833.3198 | 1598.9279 | 1598.9273 | 0.42  | 1 | 89   | 8.5e-008 | 1 | K.LWPKETVLDMAR.L                     |
| 4378 | 836.6195 | 1603.8367 | 1603.8358 | 0.54  | 0 | 71   | 1.8e-005 | 1 | K.FYFPHSINLAGIKL                     |
| 4380 | 802.9257 | 1603.8389 | 1603.8358 | 0.68  | 0 | (64) | 7e-005   | 1 | K.FYFPHSINLAGIKL                     |
| 4418 | 838.2836 | 1611.8289 | 1611.8290 | -0.10 | 0 | (77) | 3.1e-008 | 1 | K.HMLIGEGLSVADK.L                    |
| 4419 | 808.9227 | 1611.8308 | 1611.8290 | 1.08  | 0 | (95) | 5.1e-008 | 1 | K.HMLIGEGLSVADK.L                    |
| 4433 | 807.8210 | 1613.8274 | 1613.8281 | 0.80  | 0 | 86   | 4.1e-007 | 1 | R.VGESSVLDVGGAGDKL                   |
| 4445 | 806.9075 | 1615.8004 | 1615.7995 | 1.88  | 0 | 57   | 0.00038  | 1 | K.AGGAYVDPDGFPAER.L 4444             |
| 4446 | 839.8091 | 1615.8024 | 1615.7995 | 0.55  | 0 | (40) | 0.018    | 1 | K.AGGAYVDPDGFPAER.L                  |
| 4450 | 405.2324 | 1616.9003 | 1616.8998 | 0.33  | 2 | 39   | 0.018    | 1 | R.IAFSLGAKADALR.R                    |
| 4492 | 814.9185 | 1627.8225 | 1627.8240 | -0.90 | 0 | 111  | 1.7e-009 | 1 | K.HMLIGEGLSVADK.L                    |
| 4493 | 843.6182 | 1627.8239 | 1627.8240 | -0.06 | 0 | (85) | 5.8e-007 | 1 | K.HMLIGEGLSVADK.L                    |
| 4497 | 843.8382 | 1628.7839 | 1628.7836 | 0.25  | 1 | 53   | 0.00079  | 1 | R.WDQKLTIDFYR.T                      |
| 4587 | 824.9895 | 1647.8044 | 1647.8832 | 12.9  | 1 | (80) | 1.4e-008 | 1 | K.QKQVGPDSFVAVLIER.S                 |
| 4590 | 825.4109 | 1648.8073 | 1648.8057 | 1.01  | 0 | 77   | 4e-008   | 1 | K.YTGGDDIVGTPSAGR.N 4589 4591        |
| 4592 | 850.8098 | 1648.8078 | 1648.8057 | 1.28  | 0 | (37) | 0.042    | 2 | K.YTGGDDIVGTPSAGR.N                  |
| 4652 | 855.8494 | 1683.8284 | 1683.8257 | 0.21  | 1 | (37) | 0.021    | 1 | K.QKQVGPDSFVAVLIER.S                 |
| 4653 | 832.9708 | 1683.8270 | 1683.8257 | 0.75  | 1 | 85   | 3.4e-007 | 1 | K.QKQVGPDSFVAVLIER.S                 |
| 4723 | 841.4022 | 1680.7889 | 1680.7890 | 0.53  | 0 | 95   | 4.7e-008 | 1 | R.VSGQNDVVTGTFMGNR.T                 |
| 4724 | 861.2713 | 1680.7921 | 1680.7890 | 1.83  | 0 | (48) | 0.0019   | 1 | R.VSGQNDVVTGTFMGNR.T                 |
| 4786 | 849.3993 | 1698.7840 | 1698.7839 | 0.06  | 0 | (97) | 2.2e-005 | 1 | R.VSGQNDVVTGTFMGNR.T                 |
| 4787 | 868.8020 | 1698.7843 | 1698.7839 | 0.24  | 0 | (40) | 0.011    | 1 | R.VSGQNDVVTGTFMGNR.T                 |
| 4789 | 868.8210 | 1698.8411 | 1698.8420 | -0.57 | 0 | (71) | 1.3e-005 | 1 | K.AELLSHPAVFEDR.T                    |
| 4791 | 849.4286 | 1698.8427 | 1698.8420 | 0.42  | 0 | 87   | 3.8e-007 | 1 | K.AELLSHPAVFEDR.T                    |
| 4795 | 849.8887 | 1697.7829 | 1697.7879 | -3.03 | 0 | (38) | 0.012    | 1 | R.VSGQNDVVTGTFMGNR.T                 |
| 4816 | 868.6199 | 1702.8378 | 1702.8413 | -2.09 | 1 | (98) | 4.3e-005 | 1 | R.KALPEIDIEAGSGEYKA                  |
| 4817 | 852.4281 | 1702.8416 | 1702.8413 | 0.18  | 1 | 91   | 1.5e-007 | 1 | R.KALPEIDIEAGSGEYKA                  |
| 4832 | 858.9398 | 1711.8891 | 1711.8903 | -0.71 | 1 | (51) | 0.0014   | 1 | -MEITFPLTDAQR.J                      |
| 4833 | 871.6276 | 1711.8807 | 1711.8903 | 0.21  | 1 | (48) | 0.0025   | 1 | -MEITFPLTDAQR.J                      |
| 4840 | 857.3889 | 1712.7831 | 1712.7828 | 0.18  | 0 | 102  | 5.1e-009 | 1 | RETDEGIEDVYSTKL 4838 4842            |
| 4841 | 871.8298 | 1712.7845 | 1712.7828 | 0.95  | 0 | (39) | 0.01     | 1 | RETDEGIEDVYSTKL                      |
| 4850 | 873.2773 | 1718.8102 | 1718.8108 | -0.33 | 0 | (83) | 6.5e-005 | 1 | K.AGGAYVDPDYPDQR.L                   |
| 4851 | 889.4130 | 1718.8114 | 1718.8108 | 0.35  | 0 | 77   | 2.5e-008 | 1 | K.AGGAYVDPDYPDQR.L                   |
| 4852 | 873.2783 | 1718.8130 | 1718.8141 | -0.67 | 0 | 84   | 5.1e-005 | 1 | K.HSDVDFNEMIER.G 4854                |
| 4858 | 873.6132 | 1717.8178 | 1717.7981 | 11.5  | 0 | (42) | 0.0079   | 1 | K.HSDVDFNEMIER.G                     |
| 4889 | 864.9342 | 1727.8538 | 1727.8552 | -0.81 | 1 | 96   | 4.4e-008 | 1 | -MEITFPLTDAQR.J                      |
| 4890 | 876.9593 | 1727.8562 | 1727.8552 | 0.57  | 1 | (97) | 0.00038  | 1 | -MEITFPLTDAQR.J                      |
| 4900 | 878.6102 | 1732.8089 | 1732.8090 | -0.09 | 0 | (84) | 5.4e-005 | 1 | K.HSDVDFNEMIER.G 4902 4903           |
| 4901 | 867.4128 | 1732.8111 | 1732.8090 | 1.22  | 0 | (84) | 0.00046  | 1 | K.HSDVDFNEMIER.G                     |
| 4916 | 878.3134 | 1734.9182 | 1734.9181 | 1.24  | 1 | (97) | 0.00038  | 1 | K.EKQMLGMFVSTVPLR.T                  |
| 4957 | 876.4822 | 1750.9098 | 1750.9110 | -0.70 | 1 | (70) | 2e-005   | 1 | K.EKQMLGMFVSTVPLR.T                  |
| 4958 | 884.8441 | 1750.9105 | 1750.9110 | -0.30 | 1 | (58) | 0.00035  | 1 | K.EKQMLGMFVSTVPLR.T                  |
| 4959 | 884.8488 | 1750.9250 | 1750.9253 | -0.22 | 1 | 43   | 0.011    | 1 | K.YPYNLINDRETK.S                     |
| 4970 | 877.9755 | 1753.9385 |           |       |   |      |          |   |                                      |



|      |           |           |           |       |   |       |          |   |                                                                        |
|------|-----------|-----------|-----------|-------|---|-------|----------|---|------------------------------------------------------------------------|
| 5023 | 689.9758  | 1786.9057 | 1786.9059 | -0.14 | 1 | (57)  | 0.00039  | 1 | K.EKQMLGMFVSTVPLR.T                                                    |
| 5055 | 890.4847  | 1778.9149 | 1778.9183 | -0.77 | 1 | (78)  | 5.3e-008 | 1 | R.SEVKQNETFTQISR.V                                                     |
| 5056 | 693.9794  | 1778.9185 | 1778.9183 | 0.11  | 1 | 105   | 5.6e-009 | 1 | R.SEVKQNETFTQISR.V                                                     |
| 5066 | 695.2880  | 1782.9422 | 1782.8537 | -6.42 | 1 | (111) | 1.3e-009 | 1 | <a href="#">R.IJNDGGQAFSEFYKDR.M.5071</a>                              |
| 5068 | 862.4321  | 1782.9467 | 1782.8537 | -2.23 | 1 | 123   | 6.9e-011 | 1 | <a href="#">R.IJNDGGQAFSEFYKDR.M.5069</a>                              |
| 5087 | 696.3254  | 1785.9546 | 1785.9526 | 1.08  | 1 | 93    | 9.3e-008 | 1 | R.HQKYPYNLLNDLRJ.5077 5078 5079 5082 5083 5084 5086                    |
| 5124 | 699.3381  | 1794.9924 | 1794.9913 | 0.58  | 0 | 52    | 0.00083  | 1 | K.MLALVHLLGVELSK.D                                                     |
| 5145 | 452.2280  | 1804.8829 | 1804.8816 | 0.62  | 0 | (58)  | 0.00028  | 1 | K.LTMSLAYHSLFHEKT                                                      |
| 5162 | 803.6376  | 1807.8911 | 1807.8927 | -0.90 | 0 | 82    | 0.00014  | 1 | R.NPLFDVAFSMQANIK.D                                                    |
| 5163 | 804.9581  | 1807.8957 | 1807.8927 | 1.68  | 0 | (50)  | 0.0024   | 1 | R.NPLFDVAFSMQANIK.D                                                    |
| 5199 | 455.2338  | 1816.9082 | 1816.9098 | -0.30 | 0 | (54)  | 0.00075  | 1 | R.IELGEIHLQTHDR.V                                                      |
| 5200 | 806.6433  | 1816.9081 | 1816.9098 | 0.74  | 0 | (71)  | 1.7e-005 | 1 | R.IELGEIHLQTHDR.V                                                      |
| 5201 | 809.4814  | 1816.9083 | 1816.9098 | 0.68  | 0 | 120   | 1.9e-010 | 1 | R.IELGEIHLQTHDR.V                                                      |
| 5218 | 468.2284  | 1820.8787 | 1820.8787 | -0.02 | 0 | (59)  | 0.00025  | 1 | K.LTMSLAYHSLFHEKT                                                      |
| 5219 | 807.9884  | 1820.8776 | 1820.8787 | 0.42  | 0 | 78    | 5.4e-008 | 1 | K.LTMSLAYHSLFHEKT                                                      |
| 5220 | 911.4485  | 1820.8784 | 1820.8787 | 0.83  | 0 | (86)  | 3.5e-005 | 1 | K.LTMSLAYHSLFHEKT                                                      |
| 5409 | 468.2281  | 1899.0033 | 1899.0030 | 0.15  | 1 | 57    | 0.00038  | 1 | K.LJHMLJGGQGLSSVADK.L                                                  |
| 5411 | 624.0069  | 1899.0047 | 1899.0030 | 0.93  | 1 | (37)  | 0.037    | 1 | K.LJHMLJGGQGLSSVADK.L                                                  |
| 5428 | 937.4003  | 1872.8890 | 1872.8863 | 0.33  | 0 | 107   | 3.6e-008 | 1 | K.GVVLDADEESYHADAR.N.5422 5424 5425 5429 5432                          |
| 5430 | 825.3028  | 1872.8898 | 1872.8863 | 0.68  | 0 | (92)  | 9.6e-008 | 1 | K.GVVLDADEESYHADAR.N.5421 5423 5426 5427 5431 5433                     |
| 5488 | 844.0524  | 1886.9802 | 1886.9917 | -0.81 | 0 | (53)  | 0.00031  | 1 | K.QIFASLLGQTLVYPPK                                                     |
| 5496 | 830.3220  | 1887.9442 | 1887.9485 | -1.21 | 0 | 58    | 0.00004  | 1 | <a href="#">R.LLEDAADPEKPISEYK.L.5501</a>                              |
| 5497 | 844.9802  | 1887.9458 | 1887.9485 | -0.40 | 0 | (49)  | 0.00031  | 1 | <a href="#">R.LLEDAADPEKPISEYK.L.5501</a>                              |
| 5548 | 950.4583  | 1898.9891 | 1898.9845 | 0.85  | 1 | 55    | 0.00051  | 1 | <a href="#">R.MVYREGQEDVQYNR.G.5549</a>                                |
| 5567 | 950.9913  | 1899.9890 | 1899.9890 | -0.55 | 0 | 102   | 1.4e-008 | 1 | R.LQPEGVAGELYAGDGVGR.G.5566 5568 5569 5570 5571 5572 5573              |
| 5574 | 834.3330  | 1899.9772 | 1899.9890 | 4.30  | 0 | (40)  | 0.02     | 1 | R.LQPEGVAGELYAGDGVGR.G                                                 |
| 5591 | 952.5640  | 1903.1135 | 1903.1183 | -2.49 | 0 | 83    | 1.6e-005 | 1 | K.QIFASLLGQTLVYPPK                                                     |
| 5592 | 835.3800  | 1903.1182 | 1903.1183 | -0.04 | 0 | (50)  | 0.00023  | 1 | K.QIFASLLGQTLVYPPK                                                     |
| 5647 | 958.4506  | 1914.8888 | 1914.8894 | -1.47 | 1 | (40)  | 0.014    | 1 | R.MVYREGQEDVQYNR.G                                                     |
| 5648 | 839.3042  | 1914.8908 | 1914.8894 | 0.72  | 1 | (40)  | 0.013    | 1 | R.MVYREGQEDVQYNR.G                                                     |
| 5652 | 958.4854  | 1914.9581 | 1914.9580 | 0.61  | 0 | 50    | 0.0018   | 1 | K.LFTVBLEYQVWQWKE                                                      |
| 5696 | 961.4487  | 1920.8789 | 1920.8824 | -1.84 | 0 | (40)  | 0.011    | 1 | R.LTVGWFSTBMVPLDMKH                                                    |
| 5697 | 961.4488  | 1920.8830 | 1920.8824 | 0.32  | 0 | 41    | 0.011    | 1 | R.LTVGWFSTBMVPLDMKH                                                    |
| 5704 | 941.6848  | 1922.0328 | 1922.0380 | -1.87 | 0 | (62)  | 0.00011  | 1 | <a href="#">R.IELGEIAVQAPDVAK.A.5706</a>                               |
| 5705 | 952.0246  | 1922.0346 | 1922.0380 | -0.72 | 0 | 78    | 2.5e-008 | 1 | R.IELGEIAVQAPDVAK.A                                                    |
| 5720 | 482.4890  | 1925.9899 | 1925.9899 | -0.03 | 1 | 44    | 0.0002   | 1 | K.DLTMKQIQLPHPPER.K                                                    |
| 5730 | 965.0454  | 1928.0783 | 1928.0771 | -0.44 | 0 | 79    | 1.2e-008 | 1 | K.VSVLVSQGLAAVLYR.V                                                    |
| 5751 | 945.3395  | 1932.9898 | 1932.9793 | 8.97  | 0 | (50)  | 0.0021   | 1 | K.QADQGPVEVILTQIR.W                                                    |
| 5810 | 970.9888  | 1939.9631 | 1939.9628 | 0.28  | 0 | 112   | 1.5e-009 | 1 | K.TIEFSLTAETEQLTTK.V.5804 5807 5808 5809 5811 5812 5813 5816 5817 5818 |
| 5815 | 947.6823  | 1939.9650 | 1939.9628 | 1.28  | 0 | (95)  | 7.9e-008 | 1 | <a href="#">K.TIEFSLTAETEQLTTK.V.5814</a>                              |
| 5858 | 975.5181  | 1949.0217 | 1949.0218 | -0.05 | 0 | 88    | 3e-007   | 1 | K.QADQGPVEVILTQIR.W.5857 5859 5861                                     |
| 5860 | 950.8620  | 1949.0242 | 1949.0218 | 1.23  | 0 | (81)  | 0.00015  | 2 | K.QADQGPVEVILTQIR.W                                                    |
| 5951 | 888.3688  | 1988.0845 | 1988.0921 | -3.88 | 1 | (58)  | 0.00027  | 1 | <a href="#">K.HMLJGGQGLSSVADK.L.K.L.5952</a>                           |
| 5978 | 888.3189  | 1971.8947 | 1971.8980 | -0.68 | 1 | 44    | 0.0067   | 1 | R.QKHGSDVDFHEMER.G                                                     |
| 6028 | 498.5291  | 1982.0875 | 1982.0870 | 0.21  | 1 | (83)  | 6.7e-005 | 1 | K.HMLJGGQGLSSVADK.L.K.L                                                |
| 6027 | 961.7036  | 1982.0898 | 1982.0870 | 0.81  | 1 | 86    | 2.5e-007 | 1 | <a href="#">K.HMLJGGQGLSSVADK.L.K.L.6025</a>                           |
| 6057 | 962.8895  | 1985.0438 | 1985.0429 | 0.36  | 1 | (83)  | 0.0001   | 1 | <a href="#">R.EAERLQSSIDLQEGGLK.A.6058</a>                             |
| 6059 | 963.8304  | 1985.0462 | 1985.0429 | 1.89  | 1 | 85    | 6.4e-007 | 1 | R.EAERLQSSIDLQEGGLK.A                                                  |
| 6196 | 873.0040  | 2016.9901 | 2016.9912 | -0.55 | 0 | (70)  | 2.2e-005 | 1 | K.LLSEEAASQIQGNPGR.T                                                   |
| 6197 | 1006.0037 | 2016.9929 | 2016.9912 | 0.84  | 0 | 112   | 1.6e-009 | 1 | <a href="#">K.LLSEEAASQIQGNPGR.T.6199</a>                              |
| 6307 | 881.4021  | 2041.1845 | 2041.1857 | -0.59 | 0 | (51)  | 0.00029  | 1 | <a href="#">R.VGVLTKPSLEMAAIVSLVKA.6308</a>                            |
| 6309 | 811.3047  | 2041.1895 | 2041.1857 | 1.89  | 0 | (51)  | 0.0002   | 1 | R.VGVLTKPSLEMAAIVSLVKA                                                 |
| 6378 | 1029.5090 | 2057.0035 | 2057.0027 | 0.40  | 0 | 82    | 1.4e-008 | 1 | R.QVILEDDGADFLTESK.V                                                   |
| 6377 | 886.7348  | 2057.1828 | 2057.1806 | 0.98  | 0 | 73    | 2.3e-008 | 1 | R.VGVLTKPSLEMAAIVSLVKA                                                 |
| 6378 | 1029.5886 | 2057.1827 | 2057.1806 | 1.02  | 0 | (51)  | 0.0004   | 1 | R.VGVLTKPSLEMAAIVSLVKA                                                 |
| 6505 | 896.8004  | 2087.0463 | 2087.0470 | 1.11  | 0 | (108) | 3.7e-009 | 1 | <a href="#">R.NHSDTEIGIOMFVNTLAIR.S.6504</a>                           |
| 6506 | 1044.5327 | 2087.0509 | 2087.0470 | 1.87  | 0 | (58)  | 0.00037  | 1 | R.NHSDTEIGIOMFVNTLAIR.S                                                |
| 6508 | 897.0198  | 2088.0375 | 2088.0310 | 3.13  | 0 | (83)  | 1.2e-008 | 1 | R.NHSDTEIGIOMFVNTLAIR.S                                                |
| 6518 | 897.6828  | 2090.0559 | 2090.0531 | 1.32  | 0 | 86    | 7.1e-007 | 1 | K.GGNTAAAYVTPESADIEALK.S                                               |
| 6519 | 1048.0358 | 2090.0570 | 2090.0531 | 1.85  | 0 | (81)  | 1.9e-008 | 1 | K.GGNTAAAYVTPESADIEALK.S                                               |
| 6566 | 701.7038  | 2102.0898 | 2102.0895 | 0.02  | 0 | (82)  | 1.4e-008 | 1 | K.DLQFSPTVEGLAQVIAEK.G                                                 |
| 6567 | 1052.0533 | 2102.0921 | 2102.0895 | 1.23  | 0 | 90    | 2.4e-007 | 1 | K.DLQFSPTVEGLAQVIAEK.G                                                 |
| 6573 | 702.0213  | 2103.0421 | 2103.0419 | 0.09  | 0 | (95)  | 7.9e-008 | 1 | R.NHSDTEIGIOMFVNTLAIR.S.6571 6572                                      |
| 6575 | 1052.5293 | 2103.0440 | 2103.0419 | 1.03  | 0 | 128   | 6.5e-011 | 1 | R.NHSDTEIGIOMFVNTLAIR.S                                                |
| 6576 | 828.7896  | 2103.0495 | 2103.0419 | 3.62  | 0 | (58)  | 0.00041  | 1 | R.NHSDTEIGIOMFVNTLAIR.S                                                |
| 6578 | 702.3500  | 2104.0283 | 2104.0259 | 1.14  | 0 | (83)  | 0.00012  | 1 | R.NHSDTEIGIOMFVNTLAIR.S                                                |
| 6609 | 705.3716  | 2113.0931 | 2113.0916 | 0.70  | 1 | 54    | 0.00093  | 1 | K.RGLQPEGVAGELYAGDGVGR.G                                               |
| 6627 | 708.8884  | 2117.0434 | 2117.0429 | 0.24  | 0 | 93    | 1.1e-007 | 1 | K.DLQFHTIETLTOYVER.A.6626 6628                                         |
| 6630 | 1059.5314 | 2117.0482 | 2117.0429 | 2.49  | 0 | (51)  | 0.0022   | 1 | <a href="#">K.DLQFHTIETLTOYVER.A.6629</a>                              |
| 6687 | 1085.0327 | 2128.0509 | 2128.0398 | 6.20  | 0 | (77)  | 5e-008   | 1 | R.QVILEDDGADFLTESK.V                                                   |
| 6886 | 734.3781  | 2170.1125 | 2170.1270 | -6.68 | 1 | 52    | 0.0014   | 1 | R.NETEKJAAIWDQVLAIVKA                                                  |
| 6951 | 648.3228  | 2189.2819 | 2189.2812 | 0.30  | 1 | (87)  | 8.8e-008 | 1 | R.VSERKPKDQLPLFR.J.6952 6953 6955 6956 6957                            |
| 6954 | 730.7815  | 2189.2828 | 2189.2812 | 0.62  | 1 | 74    | 1.8e-008 | 1 | R.VSERKPKDQLPLFR.J.6949 6958 6959                                      |
| 6961 | 1086.6409 | 2189.2872 | 2189.2812 | 2.72  | 1 | (69)  | 4.2e-005 | 1 | R.VSERKPKDQLPLFR.J.6945 6947                                           |
| 6995 | 1102.5430 | 2203.0714 | 2203.0645 | 3.13  | 0 | (79)  | 3e-008   | 1 | K.QEGISVPSYTGQVILLDGSRT                                                |
| 7059 | 741.0398  | 2220.0680 | 2220.0910 | -1.35 | 0 | (83)  | 1.3e-007 | 1 | K.QEGISVPSYTGQVILLDGSRT                                                |
| 7060 | 1111.8598 | 2220.0628 | 2220.0910 | 0.72  | 0 | 98    | 3.5e-008 | 1 | K.QEGISVPSYTGQVILLDGSRT                                                |
| 7083 | 1111.8571 | 2221.0667 | 2221.0750 | 11.1  | 0 | (82)  | 1.6e-008 | 1 | <a href="#">K.QEGISVPSYTGQVILLDGSRT.7082</a>                           |
| 7084 | 742.7020  | 2225.0843 | 2225.0885 | -1.01 | 0 | 53    | 0.0011   | 1 | KARPVITYNGSWTYGELNAKA.7086 7087                                        |
| 7101 | 743.0359  | 2228.0858 | 2228.0705 | 8.89  | 0 | (50)  | 0.0024   | 1 | KARPVITYNGSWTYGELNAKA                                                  |
| 7102 | 1114.0513 | 2228.0880 | 2228.0705 | 7.85  | 0 | (50)  | 0.0024   | 1 | KARPVITYNGSWTYGELNAKA                                                  |
| 7105 | 743.0414  | 2228.1025 | 2228.0705 | 14.4  | 0 | (39)  | 0.008    | 1 | KARPVITYNGSWTYGELNAKA                                                  |
| 7140 | 746.7174  | 2237.1304 | 2237.1288 | 0.65  | 0 | (89)  | 3.3e-005 | 1 | U.KETNSTLYMVLASYSFLSK.I                                                |
| 7141 | 1119.5743 | 2237.1341 | 2237.1288 | 2.32  | 0 | (83)  | 0.00011  | 1 | U.KETNSTLYMVLASYSFLSK.I                                                |
| 7178 | 749.8822  | 2246.0247 | 2246.0240 | 0.34  | 0 | (87)  | 2.6e-007 | 1 | K.HTDTEDPNAEFISQWRLE                                                   |
| 7180 | 1124.0225 | 2246.0304 | 2246.0240 | 2.84  | 0 | 108   | 2.2e-009 | 1 | K.HTDTEDPNAEFISQWRLE                                                   |
| 7211 | 762.0493  | 2253.1280 | 2253.1238 | 0.93  | 0 | 85    | 8.1e-007 | 1 | U.KETNSTLYMVLASYSFLSK.I                                                |
| 7212 | 1127.5731 | 2253.1317 | 2253.1238 | 3.48  | 0 | (84)  | 9.9e-007 | 1 | U.KETNSTLYMVLASYSFLSK.I                                                |
| 7248 | 764.7147  | 2281.1222 | 2281.1175 | 2.04  | 1 | 56    | 0.00072  | 1 | K.GTAAISIPAKGDTYVPSPOK.R                                               |
| 7358 | 780.7378  | 2278.1917 | 2278.1910 | 0.32  | 1 | (81)  | 0.00017  | 1 | KALPVFTDKTVHQLFEETAQR.H                                                |
| 7359 | 670.8052  | 2278.1919 | 2278.1910 | 0.38  | 1 | 78    | 5.8e-008 | 1 | KALPVFTDKTVHQLFEETAQR.H                                                |
| 7361 | 1140.8096 | 2278.1988 | 2278.1910 | 3.33  | 1 | (88)  | 4.8e-005 | 1 | KALPVFTDKTVHQLFEETAQR.H                                                |
| 7382 | 782.0393  | 2283.0961 | 2283.0864 | 0.32  | 1 | 45    | 0.0072   | 1 | R.DTSRNPLFDVAFSMQANIK.D                                                |
| 7383 | 1142.5582 | 2283.1019 | 2283.0864 | 2.88  | 1 | (40)  | 0.021    | 1 | R.DTSRNPLFDVAFSMQANIK.D                                                |
| 7461 | 1190.1182 | 2298.2179 | 2298.2219 | -1.78 | 1 | (52)  | 0.0013   | 1 | R.GYRIELGEIAVQAPDVAK.A                                                 |
| 7464 | 675.5832  | 2298.2238 | 2298.2219 | 0.72  | 1 | (69)  | 0.00027  | 1 | R.GYRIELGEIAVQAPDVAK.A                                                 |
| 7485 | 787.0819  | 2298.2237 | 2298.2219 | 0.78  | 1 | 82    | 0.00013  | 1 | <a href="#">R.GYRIELGEIAVQAPDVAK.A.7466</a>                            |
| 7475 | 787.4130  | 2298.2172 | 2298.2099 | 4.91  | 1 | (45)  | 0.0074   | 1 | R.GYRIELGEIAVQAPDVAK.A                                                 |
| 7634 | 1167.5839 | 2333.1732 | 2333.1750 | -0.79 | 1 | 84    | 1.1e-008 | 1 | K.DKGGNTAAAYVTPESADIEALK.S                                             |
| 7635 | 778.7324  | 2333.1754 | 2333.1750 | 0.17  | 1 | (85)  | 9e-005   | 1 | <a href="#">K.DKGGNTAAAYVTPESADIEALK.S.7833</a>                        |
| 7645 | 779.0795  | 2334.2188 | 2334.2179 | -0.50 | 1 | 75    | 7.3e-008 | 1 | R.AEKQADQGPVEVILTQIR.W                                                 |
| 7756 | 788.7272  | 2383.1597 | 2383.1645 | -2.09 | 0 | (41)  | 0.023    | 1 | R.LDENGEFQVISEYRPMK.H                                                  |
| 7758 | 1182.5824 | 2383.1703 | 2383.1645 | 2.45  | 0 | 51    | 0.0023   | 2 | R.LDENGEFQVISEYRPMK.H                                                  |
| 7801 | 782.7404  | 2375.1894 | 2375.1837 | 2.42  | 1 | 43    | 0.015    | 1 | R.LTSELDERLNSMQQLMOR.H                                                 |
| 7856 | 1198.6437 | 2391.2728 | 2391.2886 | 1.78  | 0 | (99)  | 2.8e-010 | 1 | K.LV8ADADYVLEDAIQEFIR.R                                                |
| 7857 | 798.0963  | 2391.2730 | 2391.2886 | 1.85  | 0 | 117   | 3.9e-010 | 1 | K.LV8ADADYVLEDAIQEFIR.R.7854 7858                                      |
| 7878 | 800.0708  | 2397.1906 | 2397      |       |   |       |          |   |                                                                        |

|      |           |           |           |       |   |       |          |   |                                                  |
|------|-----------|-----------|-----------|-------|---|-------|----------|---|--------------------------------------------------|
| 8130 | 829.4073  | 2485.2002 | 2485.1981 | 0.85  | 0 | (87)  | 5.3e-007 | 1 | R.MYV.LQOLEDQTSYNNM.PAVLRL                       |
| 8131 | 1243.6106 | 2485.2071 | 2485.1981 | 3.83  | 0 | (89)  | 3.4e-007 | 1 | R.MYV.LQOLEDQTSYNNM.PAVLRL                       |
| 8132 | 1243.6126 | 2485.2105 | 2485.1981 | 5.01  | 0 | (90)  | 8.5e-008 | 1 | R.MYV.LQOLEDQTSYNNM.PAVLRL                       |
| 8142 | 830.7743  | 2489.3010 | 2489.3013 | -0.10 | 1 | 85    | 7.5e-005 | 1 | K.GGNTAAIAYTPESADIEALUKALKE                      |
| 8163 | 834.7396  | 2501.1970 | 2501.1930 | 1.80  | 0 | (89)  | 7.3e-005 | 1 | R.MYV.LQOLEDQTSYNNM.PAVLRL                       |
| 8164 | 1251.6103 | 2501.2061 | 2501.1930 | 5.25  | 0 | 102   | 1.7e-008 | 1 | R.MYV.LQOLEDQTSYNNM.PAVLRL                       |
| 8174 | 828.5873  | 2502.2402 | 2502.2390 | 0.45  | 1 | 74    | 1.3e-005 | 1 | K.DLFQHPHTEELTOYVERAEGK.Q                        |
| 8175 | 835.0874  | 2502.2404 | 2502.2390 | 0.83  | 1 | (70)  | 2.7e-005 | 1 | K.DLFQHPHTEELTOYVERAEGK.Q 8171 8173              |
| 8197 | 838.7899  | 2507.2578 | 2507.2577 | 0.04  | 0 | 112   | 1.8e-009 | 1 | R.NLAL.PLSAAMANLTYSGTGTGPK.G                     |
| 8198 | 1254.6408 | 2507.2572 | 2507.2577 | 3.77  | 0 | (78)  | 9e-008   | 1 | R.NLAL.PLSAAMANLTYSGTGTGPK.G                     |
| 8226 | 830.6111  | 2519.2153 | 2519.2198 | -1.41 | 0 | 38    | 0.048    | 1 | K.VHEAYHTEBNDILLAFGLAMKE                         |
| 8245 | 842.0623  | 2523.2590 | 2523.2527 | 0.95  | 0 | (77)  | 6.2e-008 | 1 | R.NLAL.PLSAAMANLTYSGTGTGPK.G                     |
| 8246 | 1282.6378 | 2523.2611 | 2523.2527 | 3.34  | 0 | (78)  | 8.3e-008 | 1 | R.NLAL.PLSAAMANLTYSGTGTGPK.G                     |
| 8248 | 842.4256  | 2524.2590 | 2524.2527 | 7.25  | 0 | (65)  | 0.00085  | 1 | R.NLAL.PLSAAMANLTYSGTGTGPK.G                     |
| 8251 | 842.4437  | 2524.3002 | 2524.3074 | 0.70  | 1 | 86    | 6.8e-005 | 1 | K.FAFVREPHEKQEVYPLSLAQR.T                        |
| 8276 | 834.5787  | 2534.2559 | 2534.2578 | -0.75 | 0 | (86)  | 6.4e-005 | 1 | R.QVH.VLSE.LQOITTYQSGSQT.LRM                     |
| 8277 | 845.7708  | 2534.2596 | 2534.2578 | 1.12  | 0 | (72)  | 1.8e-005 | 1 | R.QVH.VLSE.LQOITTYQSGSQT.LRM                     |
| 8278 | 1268.1806 | 2534.3067 | 2534.2578 | 7.48  | 0 | (71)  | 2e-006   | 1 | R.QVH.VLSE.LQOITTYQSGSQT.LRM                     |
| 8283 | 834.8109  | 2535.2145 | 2535.2138 | 0.31  | 0 | (37)  | 0.048    | 1 | K.VHEAYHTEBNDILLAFGLAMKE                         |
| 8324 | 850.7875  | 2549.3408 | 2549.3461 | -1.75 | 1 | 48    | 0.00088  | 1 | U R.LAKET.NSTL.VMLL.SASYL.SK.Y                   |
| 8333 | 838.8357  | 2551.3139 | 2551.3143 | -0.18 | 0 | 86    | 6.7e-007 | 1 | R.QVH.VLSE.LQOITTYQSGSQT.LRM 8330 8335           |
| 8337 | 851.4459  | 2551.3159 | 2551.3143 | 0.64  | 0 | (71)  | 1.8e-005 | 1 | R.QVH.VLSE.LQOITTYQSGSQT.LRM 8331                |
| 8338 | 1276.8898 | 2551.3246 | 2551.3143 | 4.02  | 0 | (38)  | 0.084    | 1 | R.QVH.VLSE.LQOITTYQSGSQT.LRM                     |
| 8340 | 851.7778  | 2552.3115 | 2552.2983 | 5.16  | 0 | (47)  | 0.0003   | 1 | R.QVH.VLSE.LQOITTYQSGSQT.LRM                     |
| 8341 | 851.7794  | 2552.3164 | 2552.2983 | 7.10  | 0 | (85)  | 8.3e-005 | 1 | R.QVH.VLSE.LQOITTYQSGSQT.LRM                     |
| 8343 | 852.1128  | 2553.3198 | 2553.2823 | 13.1  | 0 | (39)  | 0.033    | 1 | R.QVH.VLSE.LQOITTYQSGSQT.LRM                     |
| 8387 | 856.4698  | 2568.3575 | 2568.3240 | 13.1  | 1 | (44)  | 0.0077   | 1 | U R.LAKET.NSTL.VMLL.SASYL.SK.Y                   |
| 8423 | 859.4208  | 2575.2407 | 2575.2401 | 0.21  | 0 | (110) | 2.6e-009 | 1 | R.GLEAASQLEVOIQEQAADYEDRI                        |
| 8424 | 1288.6310 | 2575.2474 | 2575.2401 | 2.82  | 0 | 138   | 7e-012   | 1 | R.GLEAASQLEVOIQEQAADYEDRI                        |
| 8506 | 866.1083  | 2595.2971 | 2595.2984 | 0.28  | 0 | (58)  | 0.00055  | 1 | R.LAEQNGATL.VMML.SAYTL.SK.Y                      |
| 8507 | 866.1072  | 2595.2999 | 2595.2984 | 1.34  | 0 | (78)  | 8.2e-008 | 1 | R.LAEQNGATL.VMML.SAYTL.SK.Y                      |
| 8508 | 1298.8805 | 2595.3085 | 2595.2984 | 3.89  | 0 | (83)  | 0.00015  | 1 | R.LAEQNGATL.VMML.SAYTL.SK.Y                      |
| 8509 | 1298.8841 | 2595.3138 | 2595.2984 | 6.61  | 0 | (78)  | 5.1e-008 | 2 | R.LAEQNGATL.VMML.SAYTL.SK.Y                      |
| 8525 | 1902.1803 | 2602.3060 | 2602.3027 | 1.28  | 1 | 56    | 0.00001  | 1 | K.LLSEEAASQIQFNGRPT.PPK.D                        |
| 8526 | 868.4430  | 2602.3073 | 2602.3027 | 1.78  | 1 | (53)  | 0.00017  | 1 | K.LLSEEAASQIQFNGRPT.PPK.D                        |
| 8557 | 871.4373  | 2611.2900 | 2611.2913 | -0.52 | 0 | (83)  | 0.00015  | 1 | R.LAEQNGATL.VMML.SAYTL.SK.Y 8556                 |
| 8559 | 1906.8817 | 2611.3089 | 2611.2913 | 6.74  | 0 | 82    | 1.9e-008 | 1 | R.LAEQNGATL.VMML.SAYTL.SK.Y                      |
| 8560 | 871.7899  | 2612.2780 | 2612.2783 | 0.24  | 0 | (73)  | 1.4e-005 | 1 | R.LAEQNGATL.VMML.SAYTL.SK.Y 8563                 |
| 8565 | 1907.1588 | 2612.3031 | 2612.2783 | 10.8  | 0 | (82)  | 0.00019  | 1 | R.LAEQNGATL.VMML.SAYTL.SK.Y                      |
| 8568 | 1907.6523 | 2613.2901 | 2613.2989 | 11.8  | 0 | (71)  | 2.1e-005 | 1 | R.LAEQNGATL.VMML.SAYTL.SK.Y                      |
| 8589 | 873.7778  | 2618.3117 | 2618.3124 | -0.29 | 0 | (42)  | 0.021    | 1 | K.DLPAYM.PAVFQMDLPL.TGNGKI                       |
| 8590 | 1310.1870 | 2618.3194 | 2618.3124 | 2.68  | 0 | (59)  | 0.00048  | 1 | K.DLPAYM.PAVFQMDLPL.TGNGKI                       |
| 8656 | 1917.1825 | 2632.3604 | 2632.3498 | 0.31  | 1 | (44)  | 0.011    | 1 | R.LR.DENGE.PYQISEYR.PVDIKH                       |
| 8662 | 869.3457  | 2633.3537 | 2633.3336 | 7.81  | 1 | (49)  | 0.013    | 1 | R.LR.DENGE.PYQISEYR.PVDIKH                       |
| 8663 | 878.7933  | 2633.3582 | 2633.3336 | 9.31  | 1 | 45    | 0.0093   | 1 | R.LR.DENGE.PYQISEYR.PVDIKH                       |
| 8673 | 878.1059  | 2634.2959 | 2634.2999 | -1.54 | 1 | 90    | 3.4e-007 | 1 | K.LEMKDL.FQHPTTEL.TQYVERA 8677                   |
| 8674 | 859.5819  | 2634.2963 | 2634.2999 | -0.62 | 1 | (41)  | 0.028    | 1 | K.LEMKDL.FQHPTTEL.TQYVERA                        |
| 8676 | 878.1080  | 2634.3021 | 2634.3073 | -2.00 | 0 | (82)  | 0.002    | 1 | K.DLPAYM.PAVFQMDLPL.TGNGKI                       |
| 8686 | 878.4335  | 2635.2788 | 2635.2914 | -4.78 | 0 | (82)  | 0.00019  | 1 | K.DLPAYM.PAVFQMDLPL.TGNGKI                       |
| 8689 | 1316.8594 | 2635.3043 | 2635.2914 | 4.91  | 0 | (48)  | 0.0084   | 1 | K.DLPAYM.PAVFQMDLPL.TGNGKI                       |
| 8718 | 1322.6746 | 2643.1346 | 2643.1322 | 0.91  | 0 | 78    | 1.1e-008 | 1 | R.WEEAECEIAYFEAEEETERI                           |
| 8744 | 884.4412  | 2650.3018 | 2650.3023 | -0.16 | 0 | 84    | 0.00013  | 1 | K.DLPAYM.PAVFQMDLPL.TGNGKI                       |
| 8745 | 1326.1819 | 2650.3092 | 2650.3023 | 2.81  | 0 | (81)  | 0.00029  | 1 | K.DLPAYM.PAVFQMDLPL.TGNGKI                       |
| 8748 | 884.7703  | 2651.2890 | 2651.2883 | 1.01  | 0 | (84)  | 0.00013  | 1 | K.DLPAYM.PAVFQMDLPL.TGNGKI                       |
| 8757 | 886.4338  | 2656.2795 | 2656.2803 | -0.28 | 0 | (89)  | 3.6e-005 | 1 | K.NSIEATDGT.PAH.LQML.AAGDFEGLK.L                 |
| 8758 | 1326.1810 | 2656.2874 | 2656.2803 | 2.71  | 0 | (85)  | 9.5e-005 | 1 | K.NSIEATDGT.PAH.LQML.AAGDFEGLK.L                 |
| 8806 | 891.7884  | 2672.2774 | 2672.2752 | 0.82  | 0 | (77)  | 5.3e-008 | 1 | K.NSIEATDGT.PAH.LQML.AAGDFEGLK.L                 |
| 8809 | 1337.1478 | 2672.2806 | 2672.2752 | 2.03  | 0 | 88    | 6e-007   | 1 | K.NSIEATDGT.PAH.LQML.AAGDFEGLK.L                 |
| 8824 | 892.4289  | 2674.2590 | 2674.2432 | 5.91  | 0 | (55)  | 0.00072  | 1 | K.NSIEATDGT.PAH.LQML.AAGDFEGLK.L                 |
| 8842 | 895.1519  | 2682.4339 | 2682.4327 | 0.46  | 0 | (88)  | 4.8e-007 | 1 | R.IELSEIEV.LQQLSEVQDAAV.TAVK.D 8843              |
| 8844 | 1342.2289 | 2682.4432 | 2682.4327 | 3.91  | 0 | 114   | 7.5e-010 | 1 | R.IELSEIEV.LQQLSEVQDAAV.TAVK.D                   |
| 8863 | 896.8206  | 2687.4389 | 2687.4382 | 0.83  | 1 | 106   | 4.3e-009 | 1 | K.LLLQEGISVPDYSYTDV.LL.DGSR.T 8861 8862 8864     |
| 8872 | 897.1530  | 2688.4372 | 2688.4222 | 5.80  | 1 | (108) | 4.7e-009 | 1 | K.LLLQEGISVPDYSYTDV.LL.DGSR.T 8873               |
| 8874 | 1345.2324 | 2688.4503 | 2688.4222 | 10.5  | 1 | (50)  | 0.00051  | 1 | K.LLLQEGISVPDYSYTDV.LL.DGSR.T                    |
| 8915 | 899.7913  | 2698.3821 | 2698.3295 | 8.39  | 0 | 47    | 0.00061  | 1 | R.QLPDYM.PAVFTEVTEPLTPSGK.V                      |
| 8925 | 900.7888  | 2699.3388 | 2699.3595 | -7.78 | 1 | 57    | 0.00065  | 1 | R.QVY.LL.PEL.TEKKL.QDPFV.PGDR.M 8927             |
| 8972 | 1356.8836 | 2711.3828 | 2711.3404 | 4.50  | 0 | (44)  | 0.012    | 1 | R.QLPDYM.PAVFTEVTEPLTPSGK.V                      |
| 8982 | 879.6108  | 2714.4145 | 2714.4187 | -0.80 | 0 | (43)  | 0.012    | 1 | R.LLLEDFAAYTLQEGNEP.VLPKCT                       |
| 8984 | 905.6140  | 2714.4201 | 2714.4187 | 1.25  | 0 | (47)  | 0.0048   | 1 | R.LLLEDFAAYTLQEGNEP.VLPKCT                       |
| 8985 | 1358.2290 | 2714.4354 | 2714.4187 | 6.80  | 0 | 81    | 0.00018  | 1 | R.LLLEDFAAYTLQEGNEP.VLPKCT                       |
| 8989 | 1358.7198 | 2715.4248 | 2715.4007 | 8.83  | 0 | (44)  | 0.0092   | 1 | R.LLLEDFAAYTLQEGNEP.VLPKCT                       |
| 9031 | 911.6158  | 2732.4259 | 2732.4232 | 0.88  | 2 | 77    | 5.4e-008 | 1 | K.KGGNTAAIAYTPESADIEALUKALKE                     |
| 9077 | 889.0889  | 2782.3284 | 2782.3245 | 0.68  | 1 | 49    | 0.0039   | 1 | K.GYV.NBRL.TEKEV.PHETS.SERM 9075                 |
| 9151 | 929.1329  | 2784.3770 | 2784.3752 | 0.83  | 0 | (88)  | 7.3e-007 | 1 | R.KNSIEATDGT.PAH.LQML.AAGDFEGLK.L                |
| 9152 | 907.1018  | 2784.3771 | 2784.3752 | 0.69  | 0 | (89)  | 0.00075  | 1 | R.KNSIEATDGT.PAH.LQML.AAGDFEGLK.L                |
| 9172 | 1387.1984 | 2782.3783 | 2782.3504 | 9.98  | 0 | 148   | 8.9e-013 | 1 | K.ETAL.SAFD.GDPL.EDLGN.VGVR.D                    |
| 9224 | 934.4819  | 2800.3637 | 2800.3701 | -2.29 | 1 | 88    | 4.3e-007 | 1 | R.KNSIEATDGT.PAH.LQML.AAGDFEGLK.L                |
| 9225 | 701.0095  | 2800.3689 | 2800.3701 | -0.46 | 1 | (89)  | 0.00035  | 1 | R.KNSIEATDGT.PAH.LQML.AAGDFEGLK.L                |
| 9234 | 935.1299  | 2802.3690 | 2802.3683 | -2.25 | 0 | 81    | 0.00024  | 1 | R.VLDAFSDH.QYFEW.VL.VEDLN.PRD                    |
| 9236 | 701.8013  | 2802.3769 | 2802.3683 | 3.79  | 0 | (41)  | 0.026    | 1 | R.VLDAFSDH.QYFEW.VL.VEDLN.PRD                    |
| 9239 | 935.4870  | 2803.3793 | 2803.3493 | 10.7  | 0 | (49)  | 0.00037  | 1 | R.VLDAFSDH.QYFEW.VL.VEDLN.PRD                    |
| 9354 | 955.1870  | 2882.4491 | 2882.4514 | -0.79 | 0 | (82)  | 0.00019  | 1 | K.ETLPDYM.PVFWTL.NEL.PV.TANGK.V                  |
| 9355 | 1432.2434 | 2882.4723 | 2882.4514 | 7.30  | 0 | 84    | 0.00013  | 1 | K.ETLPDYM.PVFWTL.NEL.PV.TANGK.V                  |
| 9364 | 958.1334  | 2871.3794 | 2871.3895 | -3.85 | 2 | (40)  | 0.032    | 1 | R.DTSR.NPLD.VAFSMQ.NANIKD.LTM.K.G                |
| 9366 | 958.1353  | 2871.3841 | 2871.3895 | -1.88 | 2 | 87    | 5.8e-005 | 1 | R.DTSR.NPLD.VAFSMQ.NANIKD.LTM.K.G                |
| 9367 | 718.8541  | 2871.3871 | 2871.3895 | -0.82 | 2 | (88)  | 0.00052  | 1 | R.DTSR.NPLD.VAFSMQ.NANIKD.LTM.K.G                |
| 9369 | 719.1058  | 2872.3933 | 2872.3735 | 6.88  | 2 | (47)  | 0.00059  | 1 | R.DTSR.NPLD.VAFSMQ.NANIKD.LTM.K.G                |
| 9401 | 953.4671  | 2887.3795 | 2887.3844 | -1.71 | 2 | (85)  | 9.5e-005 | 1 | R.DTSR.NPLD.VAFSMQ.NANIKD.LTM.K.G                |
| 9402 | 722.8540  | 2887.3889 | 2887.3844 | 0.88  | 2 | (44)  | 0.014    | 1 | R.DTSR.NPLD.VAFSMQ.NANIKD.LTM.K.G                |
| 9418 | 955.4832  | 2893.4278 | 2893.4273 | 0.10  | 0 | (87)  | 7e-005   | 1 | K.FD.LT.TADETDGGL.TFVLEYNTAL.FK.Q 9417 9419 9421 |
| 9424 | 1447.7273 | 2893.4400 | 2893.4273 | 4.39  | 0 | 77    | 7e-008   | 1 | K.FD.LT.TADETDGGL.TFVLEYNTAL.FK.Q 9420 9422 9425 |
| 9436 | 725.3732  | 2897.4638 | 2897.4593 | 1.48  | 1 | (87)  | 8.9e-005 | 1 | R.KNSIEATDGT.PAH.LQML.AAGDFEGLK.L                |
| 9437 | 968.8289  | 2897.4649 | 2897.4593 | 1.95  | 1 | 72    | 2.4e-005 | 1 | R.KNSIEATDGT.PAH.LQML.AAGDFEGLK.L                |
| 9476 | 972.1589  | 2913.4521 | 2913.4542 | -0.73 | 1 | (38)  | 0.049    | 1 | R.KNSIEATDGT.PAH.LQML.AAGDFEGLK.L                |
| 9477 | 729.3709  | 2913.4543 | 2913.4542 | 0.04  | 1 | (89)  | 4.1e-005 | 1 | R.KNSIEATDGT.PAH.LQML.AAGDFEGLK.L                |
| 9514 | 1463.7844 | 2925.5543 | 2925.5546 | -0.11 | 1 | (70)  | 1.8e-005 | 1 | R.IELSEIEV.LQQLSEVQDAAV.TAVK.D                   |
| 9515 | 732.3881  | 2925.5551 | 2925.5546 | 0.18  | 1 | (85)  | 0.00085  | 1 | R.IELSEIEV.LQQLSEVQDAAV.TAVK.D                   |
| 9516 | 978.1829  | 2925.5570 | 2925.5546 | 0.80  | 1 | 83    | 8.9e-007 | 1 | R.IELSEIEV.LQQLSEVQDAAV.TAVK.D                   |
| 9598 | 740.8293  | 2958.4763 | 2958.4694 | 3.32  | 1 | 59    | 0.00051  | 1 | R.KV.DAFSDH.QYFEW.VL.VEDLN.PRD                   |
| 9612 | 742.8904  | 2987.8304 | 2987.5355 | -1.05 | 0 | 46    | 0.0078   | 1 | K.AGL.FQAE.DGDL.LL.AHHL.VVDG.VSWR.L 9614         |
| 9616 | 694.5148  | 2987.8388 | 2987.5355 | 0.35  | 0 | (38)  | 0.049    | 1 | K.AGL.FQAE.DGDL.LL.AHHL.VVDG.VSWR.L              |
| 9627 | 743.1418  | 2988.8380 | 2988.5195 | 8.22  | 0 | (40)  | 0.028    | 1 | K.AGL.FQAE.DGDL.LL.AHHL.VVDG.VSWR.L              |
| 9652 | 982.1825  | 2973.4688 | 2973.4679 | -0.71 | 1 | 51    | 0.0027   | 1 | R.GLEAASQLEVOIQEQAADYEDRI.E                      |
| 9653 | 744.3743  | 2973.4690 | 2973.4679 | 0.03  | 0 | (49)  | 0.0041   | 1 | R.GLEAASQLEVOIQEQAADYEDRI.E                      |
| 9725 | 758.1294  | 3028.4685 | 3028.4682 | 1.09  | 0 | (46)  | 0.0055   | 1 | K.OMTPEL.FQEKALLESHP.VAFV.FEDR.T                 |
| 9776 |           |           |           |       |   |       |          |   |                                                  |

|       |           |           |           |       |   |      |          |   |                                                      |
|-------|-----------|-----------|-----------|-------|---|------|----------|---|------------------------------------------------------|
| 9899  | 770.3957  | 3077.5537 | 3077.5345 | 6.21  | 0 | 58   | 0.00082  | 1 | KETGIEPLQFEBHPITTALEAEADHRE                          |
| 9945  | 1028.1873 | 3081.5400 | 3081.5389 | 0.99  | 1 | 51   | 0.0029   | 1 | RQLPDMVPAVYFTEVTEPLTPSGKVDOR                         |
| 9997  | 1033.1703 | 3086.4990 | 3086.4995 | -3.37 | 0 | (47) | 0.0007   | 1 | RMTMLENALTHPEHTIDELTJSDAEKE 9999                     |
| 9998  | 775.1323  | 3086.4999 | 3086.4995 | 0.15  | 0 | 53   | 0.0018   | 1 | RMTMLENALTHPEHTIDELTJSDAEKE                          |
| 10038 | 1039.2147 | 3114.8223 | 3114.8094 | 4.46  | 1 | 59   | 0.00033  | 1 | KDLFQSPVTEGLQVIAEAGTAAISPAEKQ                        |
| 10105 | 790.6807  | 3168.6137 | 3168.5924 | 6.75  | 0 | 41   | 0.028    | 1 | KEVFAGELPQLLSDYRPPVQSFEGDRV                          |
| 10131 | 794.4031  | 3173.5832 | 3173.5591 | 7.61  | 2 | 44   | 0.014    | 1 | RKDMTPELQFQKAEISDHPAVFEDRT                           |
| 10260 | 1070.8749 | 3209.8028 | 3209.5954 | 2.30  | 0 | 78   | 5.5e-008 | 1 | R.TYVSQFEDAGVGYNMPAAALEGPLDIQKL                      |
| 10261 | 1605.8090 | 3209.8034 | 3209.5954 | 2.47  | 0 | (50) | 0.00035  | 1 | R.TYVSQFEDAGVGYNMPAAALEGPLDIQKL                      |
| 10290 | 1078.2090 | 3225.8022 | 3225.5904 | 3.67  | 0 | (63) | 0.00016  | 1 | R.TYVSQFEDAGVGYNMPAAALEGPLDIQKL                      |
| 10291 | 1613.8096 | 3225.8028 | 3225.5904 | 3.80  | 0 | (73) | 2e-005   | 1 | R.TYVSQFEDAGVGYNMPAAALEGPLDIQKL                      |
| 10316 | 1078.5801 | 3232.8954 | 3232.9478 | 3.25  | 1 | 44   | 0.012    | 1 | K.TTLPDYMPPVWVTLNELPVTANGKVRK 10317                  |
| 10321 | 1082.9125 | 3245.7158 | 3245.7048 | 3.39  | 1 | 88   | 2.8e-005 | 1 | K.SALKETLPDYMPPVWVWVTLNELPVTANGKV                    |
| 10384 | 1094.5430 | 3280.8071 | 3280.5697 | 11.4  | 0 | 52   | 0.0024   | 1 | K.QYWMELLDVATGNPQPLSLSLVETEKQ                        |
| 10413 | 828.4388  | 3301.7253 | 3301.7405 | -4.32 | 2 | 83   | 1.2e-008 | 1 | R.QYRLESEFVQLAGLSEVDDAAVTAVKQ G 10414                |
| 10416 | 1101.9255 | 3302.7548 | 3302.7245 | 9.17  | 2 | (96) | 4.5e-005 | 1 | R.QYRLESEFVQLAGLSEVDDAAVTAVKQ.G                      |
| 10487 | 1108.8893 | 3323.5990 | 3323.5946 | -2.60 | 0 | (39) | 0.039    | 1 | K.TVQLFEEGAANTPDHTALQYEGESLYRE                       |
| 10495 | 832.4058  | 3325.5942 | 3325.5628 | 9.49  | 0 | 90   | 3.3e-007 | 1 | K.TVQLFEEGAANTPDHTALQYEGESLYRE                       |
| 10518 | 1699.8002 | 3337.5898 | 3337.5797 | 1.83  | 0 | 98   | 7.2e-008 | 1 | K.VAAPEADAEILDQIIEGAEESLNADYVARN                     |
| 10519 | 1113.6371 | 3337.5896 | 3337.5797 | 2.94  | 0 | (98) | 8.3e-008 | 1 | K.VAAPEADAEILDQIIEGAEESLNADYVARN 10517 10520 10521   |
| 10526 | 1115.8790 | 3338.6032 | 3338.5837 | 11.8  | 0 | (90) | 0.00035  | 1 | K.VAAPEADAEILDQIIEGAEESLNADYVARN                     |
| 10530 | 835.6723  | 3338.6001 | 3338.6281 | -10.2 | 1 | (47) | 0.0077   | 1 | R.MTMLENALTHPEHTIDELTJSDAEKECL                       |
| 10554 | 871.7341  | 3353.6340 | 3353.6370 | -0.91 | 1 | (91) | 0.00028  | 1 | R.MTMLENALTHPEHTIDELTJSDAEKECL                       |
| 10559 | 1118.8882 | 3353.6369 | 3353.6370 | -0.05 | 1 | (51) | 0.0026   | 1 | R.MTMLENALTHPEHTIDELTJSDAEKECL                       |
| 10557 | 839.4172  | 3353.6396 | 3353.6370 | 0.77  | 1 | (62) | 0.00028  | 1 | R.MTMLENALTHPEHTIDELTJSDAEKECL 10558 10559           |
| 10564 | 839.6638  | 3354.6262 | 3354.6210 | 1.53  | 1 | 86   | 8.1e-005 | 1 | R.MTMLENALTHPEHTIDELTJSDAEKECL                       |
| 10664 | 1139.1818 | 3414.5535 | 3414.5238 | 8.68  | 0 | 90   | 1.7e-007 | 1 | KEDVAFSGQDFVSNYLGQFDEMSDGLFTR.S                      |
| 10689 | 859.2374  | 3432.9206 | 3432.8771 | 12.7  | 1 | (32) | 0.033    | 1 | R.MALLAPPHFDSVQIFASLLGGTLVYPKK                       |
| 10706 | 862.7332  | 3446.9035 | 3446.9040 | -0.14 | 1 | 39   | 0.0098   | 1 | R.MALLAPPHFDSVQIFASLLGGTLVYPKK                       |
| 10782 | 1188.5798 | 3558.7177 | 3558.7128 | 1.44  | 0 | 48   | 0.0094   | 1 | K.YAGQFDSVQIFASLLGGTLVYPKK                           |
| 10812 | 862.6839  | 3586.7085 | 3586.7185 | -2.80 | 1 | (45) | 0.0098   | 1 | K.KTKVQLFEEGAANTPDHTALQYEGESLYRE                     |
| 10813 | 1189.9185 | 3586.7277 | 3586.7185 | 3.13  | 1 | 87   | 7e-007   | 1 | K.KTKVQLFEEGAANTPDHTALQYEGESLYRE                     |
| 10958 | 1203.2889 | 3606.7549 | 3606.7832 | -0.09 | 0 | (41) | 0.028    | 1 | R.HPLFDTMFLSQNATEGIPVGDLSLVSQETNFKJ                  |
| 10969 | 1203.6173 | 3607.8301 | 3607.8232 | 1.91  | 1 | 80   | 3.4e-008 | 1 | R.TYVSQFEDAGVGYNMPAAALEGPLDIQKLER.A                  |
| 10983 | 903.2132  | 3608.8237 | 3608.8072 | 4.57  | 1 | (62) | 0.00024  | 1 | R.TYVSQFEDAGVGYNMPAAALEGPLDIQKLER.A                  |
| 11011 | 1208.2873 | 3621.7802 | 3621.7881 | 3.87  | 0 | 83   | 1.9e-008 | 1 | R.HPLFDTMFLSQNATEGIPVGDLSLVSQETNFKJ 11010 11012      |
| 11017 | 1208.8024 | 3622.7854 | 3622.7801 | 9.74  | 0 | (42) | 0.022    | 1 | R.HPLFDTMFLSQNATEGIPVGDLSLVSQETNFKJ                  |
| 11027 | 1208.8346 | 3623.7819 | 3623.7341 | 13.2  | 0 | (59) | 0.00051  | 1 | R.HPLFDTMFLSQNATEGIPVGDLSLVSQETNFKJ                  |
| 11030 | 908.9826  | 3623.8210 | 3623.8181 | 0.79  | 1 | (43) | 0.019    | 1 | R.TYVSQFEDAGVGYNMPAAALEGPLDIQKLER.A                  |
| 11035 | 1209.6158 | 3625.8257 | 3625.7891 | 10.9  | 1 | (44) | 0.014    | 1 | R.TYVSQFEDAGVGYNMPAAALEGPLDIQKLER.A                  |
| 11045 | 909.2330  | 3632.9030 | 3632.8900 | 6.33  | 2 | 42   | 0.014    | 1 | K.SALKETLPDYMPPVWVWVTLNELPVTANGKVRK                  |
| 11077 | 911.7120  | 3642.8198 | 3642.8185 | 0.62  | 0 | (62) | 0.00028  | 1 | K.KPYTLVNNYQPTENTVATSAEHPFEGSLSIGR.A                 |
| 11089 | 729.5730  | 3642.8288 | 3642.8185 | 3.32  | 0 | (58) | 0.00094  | 1 | K.KPYTLVNNYQPTENTVATSAEHPFEGSLSIGR.A                 |
| 11091 | 1215.2846 | 3642.8318 | 3642.8185 | 4.19  | 0 | 78   | 6.3e-009 | 1 | K.KPYTLVNNYQPTENTVATSAEHPFEGSLSIGR.A                 |
| 11083 | 911.9547  | 3643.7895 | 3643.8006 | -3.03 | 0 | (39) | 0.049    | 1 | K.KPYTLVNNYQPTENTVATSAEHPFEGSLSIGR.A                 |
| 11311 | 1245.6182 | 3733.8298 | 3733.8185 | 2.22  | 0 | 95   | 1.2e-007 | 1 | R.LNDYFETNGVITITLPTQLAEGFMELENTSLR.V                 |
| 11333 | 1875.9198 | 3749.8248 | 3749.8194 | 2.97  | 0 | (56) | 0.00098  | 1 | R.LNDYFETNGVITITLPTQLAEGFMELENTSLR.V                 |
| 11334 | 1250.9514 | 3749.8324 | 3749.8194 | 5.08  | 0 | (77) | 8.1e-008 | 1 | R.LNDYFETNGVITITLPTQLAEGFMELENTSLR.V                 |
| 11479 | 1296.3179 | 3885.9318 | 3885.9272 | 1.19  | 1 | 80   | 0.00038  | 1 | R.LLEDAAADPKPSEYKLESEEAASQIQGNPFR.T                  |
| 11501 | 1303.6816 | 3907.9830 | 3907.9158 | 12.1  | 1 | 47   | 0.0084   | 1 | R.LLEDAAADPKPSEYKLESEEAASQIQGNPFR.T                  |
| 11552 | 953.9940  | 3971.9457 | 3971.9428 | 0.97  | 1 | (57) | 7.8e-007 | 1 | K.TFDVLENEVKETALSADFQADYPLEDLIGNVQGRD                |
| 11553 | 1324.9821 | 3971.9544 | 3971.9428 | 2.80  | 1 | 100  | 4.1e-008 | 2 | K.TFDVLENEVKETALSADFQADYPLEDLIGNVQGRD                |
| 11617 | 1396.0136 | 4085.0186 | 4084.9877 | 12.6  | 1 | (44) | 0.015    | 1 | R.DVSRHPLFDTMFLSQNATEGIPVGDLSLVSQETNFKJ              |
| 11624 | 1390.8754 | 4079.0044 | 4079.9846 | 2.40  | 1 | 54   | 0.0014   | 1 | R.DVSRHPLFDTMFLSQNATEGIPVGDLSLVSQETNFKJ              |
| 11625 | 1021.0079 | 4080.0028 | 4079.9786 | 5.88  | 1 | (45) | 0.013    | 1 | R.DVSRHPLFDTMFLSQNATEGIPVGDLSLVSQETNFKJ              |
| 11626 | 1361.0128 | 4080.0169 | 4079.9786 | 9.13  | 1 | (45) | 0.012    | 1 | R.DVSRHPLFDTMFLSQNATEGIPVGDLSLVSQETNFKJ              |
| 11652 | 1375.9835 | 4124.9888 | 4124.9823 | -0.86 | 0 | 71   | 2.4e-005 | 1 | R.TLSDPLDENDEENPETAVTAENLAMYTSQGGQPK.G               |
| 11653 | 1032.5002 | 4125.9719 | 4125.9843 | 6.19  | 0 | (58) | 0.00054  | 1 | R.TLSDPLDENDEENPETAVTAENLAMYTSQGGQPK.G               |
| 11657 | 1381.3300 | 4140.9881 | 4140.9872 | 2.81  | 0 | (58) | 0.00054  | 1 | R.TLSDPLDENDEENPETAVTAENLAMYTSQGGQPK.G               |
| 11659 | 829.3884  | 4141.9558 | 4141.9413 | 3.52  | 0 | (49) | 0.0042   | 1 | R.TLSDPLDENDEENPETAVTAENLAMYTSQGGQPK.G               |
| 11672 | 1389.0016 | 4183.9829 | 4183.9748 | 1.98  | 0 | 85   | 1.1e-008 | 1 | K.KETNLSITEQDTLGLSNYVDFDFMDFGSLNGAKL                 |
| 11677 | 1042.7545 | 4186.9890 | 4186.9288 | 14.9  | 0 | (68) | 9e-005   | 1 | K.KETNLSITEQDTLGLSNYVDFDFMDFGSLNGAKL                 |
| 11695 | 1053.6334 | 4210.1047 | 4210.0886 | 1.92  | 1 | (69) | 4.7e-005 | 1 | R.LAEQNGATLYMMLBAYTLLSKYTGDDIVGTPSAGR.N              |
| 11697 | 1405.0486 | 4212.1161 | 4212.0846 | 12.7  | 1 | 73   | 1.6e-005 | 1 | R.LAEQNGATLYMMLBAYTLLSKYTGDDIVGTPSAGR.N              |
| 11707 | 1415.0325 | 4242.0798 | 4242.0884 | -2.58 | 1 | (67) | 8.1e-005 | 1 | R.LAEQNGATLYMMLBAYTLLSKYTGDDIVGTPSAGR.N              |
| 11746 | 1085.2590 | 4337.0070 | 4337.0283 | -4.45 | 1 | 89   | 2.8e-007 | 1 | R.YLTAPEKEDVAFSIQDPVSNYLGQFDEMSDGLFTR.S              |
| 11748 | 1085.5143 | 4338.0280 | 4338.0103 | 4.08  | 1 | (77) | 5.2e-008 | 1 | R.YLTAPEKEDVAFSIQDPVSNYLGQFDEMSDGLFTR.S              |
| 11756 | 1089.2854 | 4353.0324 | 4353.0212 | 2.57  | 1 | (63) | 0.00016  | 1 | R.YLTAPEKEDVAFSIQDPVSNYLGQFDEMSDGLFTR.S 11757 11758  |
| 11762 | 1089.7848 | 4355.0300 | 4354.9892 | 9.35  | 1 | (44) | 0.012    | 1 | R.YLTAPEKEDVAFSIQDPVSNYLGQFDEMSDGLFTR.S              |
| 11765 | 1089.7898 | 4355.0451 | 4354.9892 | 12.8  | 1 | (41) | 0.028    | 1 | R.YLTAPEKEDVAFSIQDPVSNYLGQFDEMSDGLFTR.S              |
| 11806 | 1499.0728 | 4494.1981 | 4494.1839 | 9.39  | 1 | 80   | 0.00043  | 1 | R.TWKETNLSITEQDTLGLSNYVDFDFMDFGSLNGAKL               |
| 11829 | 1509.0812 | 4524.1617 | 4524.1757 | -3.10 | 1 | (43) | 0.018    | 1 | R.TWKETNLSITEQDTLGLSNYVDFDFMDFGSLNGAKL               |
| 11830 | 1192.0576 | 4524.2014 | 4524.1757 | 5.68  | 1 | (46) | 0.0091   | 1 | R.TWKETNLSITEQDTLGLSNYVDFDFMDFGSLNGAKL               |
| 11856 | 1154.3378 | 4613.3222 | 4613.3040 | 3.94  | 1 | 88   | 4.8e-005 | 1 | K.LFTVBLEYQVQWQKEEDLAFTEPFISGSLNDVSHK.CD             |
| 11890 | 824.0889  | 4615.3103 | 4615.2720 | 8.30  | 1 | (91) | 0.00028  | 1 | K.LFTVBLEYQVQWQKEEDLAFTEPFISGSLNDVSHK.CD             |
| 11891 | 1539.4458 | 4615.3149 | 4615.2720 | 9.28  | 1 | (51) | 0.0028   | 1 | K.LFTVBLEYQVQWQKEEDLAFTEPFISGSLNDVSHK.CD             |
| 11894 | 1164.8394 | 4615.3283 | 4615.2720 | 12.2  | 1 | (62) | 0.00019  | 1 | K.LFTVBLEYQVQWQKEEDLAFTEPFISGSLNDVSHK.CD 11859 11863 |

2. [gi|499188862](#) MULTISPECIES: Surfactin synthase subunit 1 [Bacillus]
3. [gi|15488337](#) non-ribosomal peptide synthetase [Bacillus subtilis]
4. [gi|505915452](#) non-ribosomal peptide synthetase [Bacillus subtilis]
5. [gi|674707697](#) non-ribosomal peptide synthetase [Bacillus subtilis]
6. [gi|396481](#) srfA1 [Bacillus subtilis]
7. [gi|757756185](#) non-ribosomal peptide synthetase [Bacillus subtilis]
8. [gi|674300653](#) non-ribosomal peptide synthetase [Bacillus subtilis]
9. [gi|740642894](#) non-ribosomal peptide synthetase [Bacillus subtilis]
10. [gi|727789220](#) non-ribosomal peptide synthetase [Bacillus subtilis]
11. [gi|695810999](#) non-ribosomal peptide synthetase [Bacillus subtilis]
12. [gi|516292825](#) non-ribosomal peptide synthetase [Bacillus subtilis]
13. [gi|753212334](#) non-ribosomal peptide synthetase [Bacillus subtilis]
14. [gi|752706032](#) non-ribosomal peptide synthetase [Bacillus subtilis]
15. [gi|695808907](#) non-ribosomal peptide synthetase [Bacillus subtilis]
16. [gi|827042896](#) non-ribosomal peptide synthetase [Bacillus subtilis]
17. [gi|754291220](#) non-ribosomal peptide synthetase [Bacillus subtilis]
18. [gi|753213776](#) non-ribosomal peptide synthetase [Bacillus subtilis]
19. [gi|740641903](#) non-ribosomal peptide synthetase [Bacillus subtilis]
20. [gi|752689006](#) non-ribosomal peptide synthetase [Bacillus subtilis]
21. [gi|760325311](#) non-ribosomal peptide synthetase [Bacillus subtilis]
22. [gi|763172991](#) non-ribosomal peptide synthetase [Bacillus subtilis]
23. [gi|674707698](#) non-ribosomal peptide synthetase [Bacillus subtilis]
24. [gi|52705403](#) non-ribosomal peptide synthetase, partial [Bacillus subtilis]
25. [gi|727789222](#) non-ribosomal peptide synthetase [Bacillus subtilis]
26. [gi|657202728](#) non-ribosomal peptide synthetase, partial [Bacillus subtilis]
27. [gi|627042897](#) non-ribosomal peptide synthetase [Bacillus subtilis]
28. [gi|627042897](#) ATP-dependent isoleucine adenylyase [Bacillus subtilis]
29. [gi|499188863](#) MULTISPECIES: Surfactin synthase subunit 2 [Bacillus]
30. [gi|695816705](#) non-ribosomal peptide synthetase [Bacillus subtilis]
31. [gi|516292826](#) ATP-dependent isoleucine adenylyase [Bacillus subtilis]
32. [gi|10425190](#) non-ribosomal peptide synthetase [Bacillus subtilis]
33. [gi|639241916](#) non-ribosomal peptide synthetase, partial [Bacillus subtilis]
34. [gi|752704565](#) non-ribosomal peptide synthetase [Bacillus subtilis]
35. [gi|752706030](#) non-ribosomal peptide synthetase [Bacillus subtilis]
36. [gi|742326967](#) non-ribosomal peptide synthetase, partial [Bacillus subtilis]
37. [gi|760325309](#) non-ribosomal peptide synthetase [Bacillus subtilis]
38. [gi|504288673](#) non-ribosomal peptide synthetase [Bacillus subtilis]
39. [gi|396482](#) srfA2 [Bacillus subtilis]
40. [gi|757756184](#) non-ribosomal peptide synthetase, partial [Bacillus subtilis]
41. [gi|753215568](#) non-ribosomal peptide synthetase [Bacillus subtilis]

42. [gi|764674904](#) non-ribosomal peptide synthetase [Bacillus subtilis]  
43. [gi|764654741](#) non-ribosomal peptide synthetase [Bacillus subtilis]  
44. [gi|779919036](#) non-ribosomal peptide synthetase [Bacillus subtilis]  
45. [gi|680519617](#) non-ribosomal peptide synthetase, partial [Bacillus subtilis]  
46. [gi|5033878625](#) non-ribosomal peptide synthetase [Bacillus subtilis]  
47. [gi|768925197](#) peptide synthetase, partial [Bacillus subtilis]  
48. [gi|764654743](#) non-ribosomal peptide synthetase [Bacillus subtilis]  
49. [gi|518087235](#) non-ribosomal peptide synthetase, partial [Bacillus subtilis]  
50. [gi|695618466](#) non-ribosomal peptide synthetase, partial [Bacillus subtilis]  
51. [gi|764674907](#) non-ribosomal peptide synthetase [Bacillus subtilis]  
52. [gi|518087238](#) ATP-dependent isoleucine adenylyase, partial [Bacillus subtilis]  
53. [gi|695618613](#) non-ribosomal peptide synthetase, partial [Bacillus subtilis]  
54. [gi|695614150](#) non-ribosomal peptide synthetase, partial [Bacillus subtilis]  
55. [gi|195430078](#) ATP-dependent isoleucine adenylyase, partial [Bacillus subtilis]  
56. [gi|445344970](#) surfactin synthetase [Bacillus subtilis subsp. inaquosorum KCTC 13429]  
57. [gi|768925675](#) peptide synthetase, partial [Bacillus subtilis]  
58. [gi|74064284](#) non-ribosomal peptide synthetase [Bacillus subtilis]  
59. [gi|320017752](#) pilpastatin synthetase [Bacillus subtilis BSr5]  
60. [gi|17518185](#) non-ribosomal peptide synthetase [Bacillus subtilis]  
61. [gi|923999429](#) Surfactin synthase subunit 1 [Bacillus subtilis]  
62. [gi|82728634](#) peptide synthetase [Bacillus subtilis]  
63. [gi|505296192](#) Pilpastatin synthetase [Bacillus subtilis]  
64. [gi|825064565](#) peptide synthetase [Bacillus subtilis]  
65. [gi|917026198](#) non-ribosomal peptide synthetase [Bacillus subtilis]  
66. [gi|736713228](#) non-ribosomal peptide synthetase [Bacillus subtilis]  
67. [gi|445344937](#) surfactin synthetase subunit 2 SrfAB [Bacillus subtilis subsp. inaquosorum KCTC 13429]  
68. [gi|4886972](#) recombinant surfactin/lichensyn A synthetase [Bacillus subtilis]  
69. [gi|740676824](#) non-ribosomal peptide synthetase [Bacillus subtilis]  
70. [gi|923999290](#) Surfactin synthase subunit 2 [Bacillus subtilis]  
71. [gi|752704448](#) non-ribosomal peptide synthetase [Bacillus subtilis]  
72. [gi|688756644](#) peptide synthetase, partial [Bacillus subtilis]  
73. [gi|504282624](#) MULTISPECIES: non-ribosomal peptide synthetase [Bacillus subtilis group]  
74. [gi|351470200](#) pilpastatin synthetase [Bacillus subtilis subsp. subtilis str. SC-8]  
75. [gi|859925332](#) Long-chain-fatty-acid-CoA ligase [Bacillus subtilis E1]  
76. [gi|740676313](#) non-ribosomal peptide synthetase [Bacillus subtilis]  
77. [gi|504292089](#) MULTISPECIES: hypothetical protein [Bacillus]  
78. [gi|504282623](#) MULTISPECIES: non-ribosomal peptide synthetase [Bacillus subtilis group]  
79. [gi|751901523](#) Long-chain-fatty-acid-CoA ligase [Bacillus subtilis]  
80. [gi|768926052](#) hypothetical protein UM89\_15610, partial [Bacillus subtilis]  
81. [gi|740642210](#) polyketide synthase [Bacillus subtilis]  
82. [gi|505196613](#) polyketide synthase [Bacillus subtilis]  
83. [gi|740642206](#) polyketide synthase [Bacillus subtilis]  
84. [gi|924004027](#) Polyketide synthase PksR [Bacillus subtilis]  
85. [gi|827043484](#) polyketide synthase [Bacillus subtilis]  
86. [gi|92377047](#) fengycin synthetase FenA [Bacillus subtilis]  
87. [gi|402363](#) RNA polymerase beta-subunit [Bacillus subtilis subsp. subtilis str. 168]  
88. [gi|740642208](#) polyketide synthase [Bacillus subtilis]  
89. [gi|351469279](#) polyketide synthase [Bacillus subtilis subsp. subtilis str. SC-8]  
90. [gi|7469241](#) polyketide synthetase pksP [similarity] - Bacillus subtilis  
91. [gi|740642428](#) integrase [Bacillus subtilis]  
92. [gi|857203374](#) polyketide synthase [Bacillus subtilis]  
93. [gi|827043548](#) non-ribosomal peptide synthetase [Bacillus subtilis]  
94. [gi|763172872](#) non-ribosomal peptide synthetase [Bacillus subtilis]  
95. [gi|740643551](#) polyketide synthase [Bacillus subtilis]  
96. [gi|504290741](#) integrase [Bacillus subtilis]  
97. [gi|754291355](#) polyketide synthase [Bacillus subtilis]  
98. [gi|351468438](#) DNA-directed RNA polymerase subunit beta [Bacillus subtilis subsp. subtilis str. SC-8]  
99. [gi|674584702](#) non-ribosomal peptide synthase domain protein [Bacillus subtilis subsp. niger]  
100. [gi|924029892](#) Polyketide synthase PksR [Bacillus subtilis]  
101. [gi|740676906](#) non-ribosomal peptide synthetase [Bacillus subtilis]  
102. [gi|489331117](#) methyltransferase [Bacillus subtilis]  
103. [gi|505917298](#) polyketide synthase [Bacillus subtilis]  
104. [gi|489312316](#) flagellar hook protein FlgK [Bacillus subtilis]  
105. [gi|740677509](#) non-ribosomal peptide synthetase [Bacillus subtilis]  
106. [gi|446490082](#) MULTISPECIES: DNA-directed RNA polymerase subunit beta' [Bacillus cereus group]  
107. [gi|39912](#) unnamed protein product [Bacillus subtilis subsp. subtilis str. 168]  
108. [gi|2522214](#) fengycin synthetase FenE [Bacillus subtilis]  
109. [gi|503155878](#) MULTISPECIES: non-ribosomal peptide synthetase [Bacillus subtilis group]  
110. [gi|924029695](#) Polyketide synthase PksL [Bacillus subtilis]  
111. [gi|82502197](#) SubC [Bacillus subtilis]  
112. [gi|57850259](#) Vpr [Bacillus subtilis]  
113. [gi|489423080](#) MULTISPECIES: non-ribosomal peptide synthetase [Bacillus subtilis group]  
114. [gi|757256397](#) hypothetical protein [Bacillus subtilis]  
115. [gi|763173815](#) hypothetical protein [Bacillus subtilis]  
116. [gi|40003](#) oxoglutarate dehydrogenase (NADP+) [Bacillus subtilis subsp. subtilis str. 168]

# Figure 17. MASCOT report for MS/MS analysis of gel excised fluorescent protein (###, SrfAB) bands from the *B. subtilis* ATCC 21332 proteome.

Database : NCBI nr 20151207 (77704964 sequences; 28292933996 residues)

Taxonomy : *Bacillus subtilis* (127756 sequences)

Protein hits [gi|740641903](#) non-ribosomal peptide synthetase [*Bacillus subtilis*]

[gi|740641901](#) non-ribosomal peptide synthetase [*Bacillus subtilis*]

[gi|740642284](#) non-ribosomal peptide synthetase [*Bacillus subtilis*]

[gi|740641903](#) Mass: 400578 Score: 17251 Matches: 433(433) Sequences: 185(185) emPAI: 7.02

non-ribosomal peptide synthetase [*Bacillus subtilis*]

| Query                | Observed | Mr(expt)  | Mr(calcd) | ppm   | Miss | Score | Expect   | Rank | Unique | Peptide                                                 |
|----------------------|----------|-----------|-----------|-------|------|-------|----------|------|--------|---------------------------------------------------------|
| <a href="#">4624</a> | 314.7082 | 627.3958  | 627.3958  | 0.37  | 0    | 29    | 0.019    | 1    |        | R.TGPLLKA                                               |
| <a href="#">4660</a> | 635.3765 | 634.3692  | 634.3690  | 0.29  | 0    | 36    | 0.0086   | 1    |        | K.DILFKV                                                |
| <a href="#">5156</a> | 414.7631 | 827.5116  | 827.5116  | -0.09 | 0    | 35    | 0.02     | 1    |        | R.LVLGGQEKI                                             |
| <a href="#">5159</a> | 415.7403 | 829.4680  | 829.4657  | 0.27  | 0    | 38    | 0.035    | 1    |        | K.SVNEIIRS                                              |
| <a href="#">5168</a> | 417.7270 | 833.4394  | 833.4395  | -0.21 | 0    | 37    | 0.035    | 1    |        | K.FAVVNERLN                                             |
| <a href="#">5183</a> | 419.7301 | 837.4456  | 837.4457  | -0.13 | 0    | 43    | 0.0033   | 1    |        | K.GVQIEHRLN                                             |
| <a href="#">5226</a> | 429.7251 | 857.4356  | 857.4355  | 0.12  | 0    | (33)  | 0.032    | 1    |        | R.ELNAAANRL                                             |
| <a href="#">5227</a> | 429.7251 | 857.4356  | 857.4355  | 0.19  | 0    | (33)  | 0.029    | 1    |        | R.ELNAAANRL                                             |
| <a href="#">5228</a> | 429.7251 | 857.4356  | 857.4355  | 0.19  | 0    | (35)  | 0.016    | 1    |        | R.ELNAAANRL                                             |
| <a href="#">5229</a> | 429.7251 | 857.4357  | 857.4355  | 0.26  | 0    | (37)  | 0.012    | 1    |        | R.ELNAAANRL                                             |
| <a href="#">5230</a> | 429.7252 | 857.4358  | 857.4355  | 0.33  | 0    | (37)  | 0.012    | 1    |        | R.ELNAAANRL                                             |
| <a href="#">5231</a> | 429.7252 | 857.4359  | 857.4355  | 0.47  | 0    | 39    | 0.0089   | 1    |        | R.ELNAAANRL                                             |
| <a href="#">5252</a> | 436.7482 | 871.4759  | 871.4763  | -0.45 | 0    | 36    | 0.03     | 1    | U      | R.EVAVGELRK                                             |
| <a href="#">5281</a> | 442.2409 | 882.4673  | 882.4671  | 0.22  | 0    | 39    | 0.0085   | 1    |        | K.AAAANPNVRL                                            |
| <a href="#">5282</a> | 442.2411 | 882.4676  | 882.4671  | 0.58  | 0    | (36)  | 0.0099   | 1    |        | K.AAAANPNVRL                                            |
| <a href="#">5406</a> | 466.2640 | 930.5135  | 930.5134  | 0.11  | 0    | 43    | 0.0097   | 1    |        | K.LQSSLDLRT                                             |
| <a href="#">5469</a> | 476.2302 | 950.4458  | 950.4457  | 0.09  | 0    | 45    | 0.0028   | 1    |        | K.DANFESLRL                                             |
| <a href="#">5475</a> | 476.7481 | 951.4817  | 951.4814  | 0.34  | 0    | 44    | 0.0043   | 1    |        | K.WSEYVLR                                               |
| <a href="#">5512</a> | 482.7642 | 963.5138  | 963.5138  | 0.07  | 0    | 64    | 5.4e-005 | 1    |        | K.AGNLLTYRLE                                            |
| <a href="#">5527</a> | 485.2299 | 968.4453  | 968.4451  | 0.29  | 0    | 40    | 0.0086   | 1    |        | R.YSLEDGAKF                                             |
| <a href="#">5528</a> | 485.2299 | 968.4453  | 968.4451  | 0.29  | 0    | (39)  | 0.0058   | 1    |        | R.YSLEDGAKF                                             |
| <a href="#">5568</a> | 492.2345 | 982.4544  | 982.4542  | 0.17  | 0    | 47    | 0.0015   | 1    |        | K.DAGMFGTLR.H + Oxidation (M)                           |
| <a href="#">5671</a> | 507.8006 | 1013.5867 | 1013.5869 | -0.20 | 1    | 46    | 0.0028   | 1    |        | K.IVQLEEKRH                                             |
| <a href="#">5727</a> | 516.2847 | 1030.5548 | 1030.5548 | 0.17  | 0    | 42    | 0.012    | 1    |        | R.IELGIEITKL                                            |
| <a href="#">5745</a> | 521.2372 | 1040.4598 | 1040.4597 | 0.12  | 0    | 46    | 0.0028   | 1    |        | R.FMAEDSSVR.M                                           |
| <a href="#">5754</a> | 521.8164 | 1041.6161 | 1041.6162 | -0.07 | 1    | 52    | 0.00044  | 1    |        | R.KLVEQLQK.G                                            |
| <a href="#">5756</a> | 522.3268 | 1042.6391 | 1042.6386 | 0.47  | 1    | 39    | 0.011    | 1    |        | R.VLLTGGDKLKR                                           |
| <a href="#">5798</a> | 529.7834 | 1057.5522 | 1057.5516 | 0.59  | 0    | 69    | 1.4e-005 | 1    |        | R.DSLNQLVNR.H                                           |
| <a href="#">5879</a> | 537.3137 | 1072.6128 | 1072.6128 | -0.02 | 1    | 52    | 0.00087  | 1    |        | R.SKLVQLEEK.R                                           |
| <a href="#">5884</a> | 538.2613 | 1074.5061 | 1074.5080 | 0.10  | 0    | 44    | 0.0057   | 1    |        | R.EEEDAEIKA                                             |
| <a href="#">5888</a> | 538.2785 | 1074.5424 | 1074.5418 | 0.64  | 0    | 43    | 0.0088   | 1    |        | K.ERPSSISGSR.N                                          |
| <a href="#">5889</a> | 538.2787 | 1074.5428 | 1074.5418 | 0.99  | 0    | (38)  | 0.025    | 1    |        | K.ERPSSISGSR.N                                          |
| <a href="#">5893</a> | 539.2536 | 1076.4926 | 1076.4920 | 0.57  | 0    | 77    | 2.2e-006 | 1    |        | K.GETAAIMNDR.S                                          |
| <a href="#">5924</a> | 544.3091 | 1086.6036 | 1086.6033 | 0.25  | 0    | 56    | 0.00039  | 1    |        | R.DVIGSVTAGRT                                           |
| <a href="#">5929</a> | 545.2581 | 1088.5016 | 1088.5028 | -0.94 | 0    | 34    | 0.033    | 1    |        | R.YFTETATK.G                                            |
| <a href="#">5939</a> | 547.2511 | 1092.4876 | 1092.4870 | 0.64  | 0    | (56)  | 0.00022  | 1    |        | K.GETAAIMNDR.S + Oxidation (M)                          |
| <a href="#">6076</a> | 572.8396 | 1143.6851 | 1143.6852 | -0.06 | 0    | 45    | 0.0034   | 1    |        | K.IIPTDLVLR.K                                           |
| <a href="#">6082</a> | 574.7831 | 1147.5517 | 1147.5509 | 0.69  | 0    | 38    | 0.025    | 1    |        | K.EEQTFEPIR.Q                                           |
| <a href="#">6087</a> | 575.3168 | 1148.6190 | 1148.6190 | 0.01  | 0    | (76)  | 4.4e-006 | 1    |        | R.LSDGLAFIGRA                                           |
| <a href="#">6088</a> | 575.3173 | 1148.6200 | 1148.6190 | 0.87  | 0    | 80    | 1.5e-006 | 1    |        | R.LSDGLAFIGRA                                           |
| <a href="#">6091</a> | 576.2975 | 1150.5804 | 1150.5805 | -0.03 | 0    | 55    | 0.0004   | 1    |        | R.MYVLNQLDR.Q                                           |
| <a href="#">6116</a> | 582.8167 | 1163.6189 | 1163.6186 | 0.20  | 0    | 66    | 3.5e-005 | 1    |        | R.QIVFVNSTK.A                                           |
| <a href="#">6121</a> | 583.3088 | 1164.6030 | 1164.6026 | 0.31  | 0    | (44)  | 0.0081   | 1    |        | R.QIVFVNSTK.A + Deamidated (NQ)                         |
| <a href="#">6128</a> | 584.2954 | 1168.5763 | 1168.5754 | 0.78  | 0    | (41)  | 0.013    | 1    |        | R.MYVLNQLDR.Q + Oxidation (M)                           |
| <a href="#">6150</a> | 589.8066 | 1177.5967 | 1177.5979 | 0.72  | 0    | 56    | 0.00033  | 1    |        | K.FDLSLEAVERLE                                          |
| <a href="#">6199</a> | 600.5870 | 1196.7392 | 1196.7397 | -0.45 | 2    | 56    | 0.00013  | 1    |        | R.VLLTGGDKLKR.A                                         |
| <a href="#">6231</a> | 604.8071 | 1207.5996 | 1207.5986 | 0.84  | 0    | 69    | 1.9e-005 | 1    |        | K.WTGGGIEYGR.I                                          |
| <a href="#">6236</a> | 606.3168 | 1210.6191 | 1210.6234 | -3.63 | 0    | 36    | 0.035    | 1    |        | K.TFAQLFEEVKT                                           |
| <a href="#">6249</a> | 610.8249 | 1219.6363 | 1219.6349 | 0.33  | 0    | (41)  | 0.013    | 1    |        | K.AFVQPFELN.R.A                                         |
| <a href="#">6250</a> | 610.8251 | 1219.6365 | 1219.6349 | 0.62  | 0    | 50    | 0.0016   | 1    |        | K.AFVQPFELN.R.A                                         |
| <a href="#">6251</a> | 610.8252 | 1219.6368 | 1219.6349 | 0.74  | 0    | (46)  | 0.0048   | 1    |        | K.AFVQPFELN.R.A                                         |
| <a href="#">6252</a> | 610.8254 | 1219.6363 | 1219.6349 | 1.13  | 0    | (43)  | 0.007    | 1    |        | K.AFVQPFELN.R.A                                         |
| <a href="#">6253</a> | 610.8254 | 1219.6363 | 1219.6349 | 1.13  | 0    | (36)  | 0.037    | 1    |        | K.AFVQPFELN.R.A                                         |
| <a href="#">6254</a> | 610.8254 | 1219.6363 | 1219.6349 | 1.13  | 0    | (41)  | 0.011    | 1    |        | K.AFVQPFELN.R.A                                         |
| <a href="#">6285</a> | 610.8254 | 1219.6363 | 1219.6349 | 1.13  | 0    | (41)  | 0.011    | 1    |        | K.AFVQPFELN.R.A                                         |
| <a href="#">6285</a> | 410.5785 | 1228.7136 | 1228.7139 | -0.28 | 2    | (40)  | 0.01     | 1    |        | R.SKLVQLEEKRH                                           |
| <a href="#">6286</a> | 615.3642 | 1228.7138 | 1228.7139 | -0.04 | 2    | (37)  | 0.021    | 1    |        | R.SKLVQLEEKRH                                           |
| <a href="#">6287</a> | 308.1859 | 1228.7145 | 1228.7139 | 0.52  | 2    | (34)  | 0.046    | 1    |        | R.SKLVQLEEKRH                                           |
| <a href="#">6288</a> | 615.3646 | 1228.7147 | 1228.7139 | 0.64  | 2    | 62    | 6.5e-005 | 1    |        | R.SKLVQLEEKRH                                           |
| <a href="#">6302</a> | 617.3170 | 1232.6195 | 1232.6190 | 0.41  | 0    | 45    | 0.0057   | 1    |        | R.FVADPFVPGIER.M                                        |
| <a href="#">6308</a> | 618.3114 | 1234.6062 | 1234.6062 | 0.08  | 0    | 53    | 0.00086  | 1    | U      | R.VDLSDPDTPV.K.R                                        |
| <a href="#">6319</a> | 613.5506 | 1237.6301 | 1237.6302 | -0.14 | 1    | 47    | 0.0027   | 1    |        | R.IRYSLEDGAKF                                           |
| <a href="#">6326</a> | 620.8201 | 1239.6256 | 1239.6246 | 0.67  | 0    | 52    | 0.00084  | 1    |        | K.SLFFQNYEARL.A                                         |
| <a href="#">6329</a> | 621.3112 | 1240.6078 | 1240.6068 | -0.80 | 0    | (52)  | 0.001    | 1    |        | K.SLFFQNYEARL.A + Deamidated (NQ)                       |
| <a href="#">6367</a> | 628.3265 | 1256.6385 | 1256.6401 | -1.24 | 0    | 47    | 0.0032   | 1    |        | K.AEVDLHVFEAKL                                          |
| <a href="#">6368</a> | 419.6876 | 1256.6409 | 1256.6401 | 0.63  | 0    | (40)  | 0.014    | 1    |        | K.AEVDLHVFEAKL                                          |
| <a href="#">6390</a> | 631.6350 | 1261.6554 | 1261.6554 | -0.02 | 0    | 55    | 0.00084  | 1    |        | R.GYVNLPELTKQ                                           |
| <a href="#">6419</a> | 635.3437 | 1268.6728 | 1268.6724 | 0.31  | 0    | 38    | 0.02     | 1    |        | R.EDIIPNVNISR.T                                         |
| <a href="#">6435</a> | 636.6875 | 1271.7605 | 1271.7601 | 0.25  | 1    | 40    | 0.0042   | 1    |        | K.IIPTDLVLR.K.M                                         |
| <a href="#">6465</a> | 642.3010 | 1282.5875 | 1282.5863 | 0.92  | 0    | 55    | 0.00034  | 1    |        | K.QDMYPLSSAGK.R + Oxidation (M)                         |
| <a href="#">6487</a> | 644.8231 | 1287.6317 | 1287.6306 | 0.83  | 1    | 47    | 0.0032   | 1    |        | K.GREEDAEIIEKA                                          |
| <a href="#">6494</a> | 646.6736 | 1291.7326 | 1291.7322 | 0.35  | 1    | 37    | 0.018    | 1    |        | R.FKENLLMLR.H + Oxidation (M)                           |
| <a href="#">6495</a> | 431.5848 | 1291.7327 | 1291.7322 | 0.39  | 1    | (37)  | 0.02     | 1    |        | R.FKENLLMLR.H + Oxidation (M)                           |
| <a href="#">6499</a> | 647.7994 | 1293.6842 | 1293.6837 | 0.40  | 0    | 69    | 1.6e-005 | 1    |        | R.EYGLVDEEQR.Q                                          |
| <a href="#">6505</a> | 648.3169 | 1294.6172 | 1294.6153 | 1.43  | 1    | 35    | 0.045    | 1    |        | R.GYLNREDETAKR                                          |
| <a href="#">6537</a> | 651.8254 | 1301.6363 | 1301.6364 | -0.08 | 0    | 50    | 0.0016   | 1    |        | K <sub>2</sub> QAQQTDPHPAVKA + Gln->pyro-Glu (N-term Q) |
| <a href="#">6554</a> | 663.3671 | 1304.7197 | 1304.7201 | -0.28 | 1    | 56    | 0.0002   | 1    |        | R.LRSDGLAFIGRA                                          |
| <a href="#">6556</a> | 435.9139 | 1304.7200 | 1304.7201 | -0.07 | 1    | (45)  | 0.0042   | 1    |        | R.LRSDGLAFIGRA                                          |
| <a href="#">6599</a> | 440.5616 | 1318.6631 | 1318.6630 | 0.12  | 0    | (36)  | 0.045    | 1    |        | K.QAQQTDPHPAVKA                                         |
| <a href="#">6600</a> | 660.3394 | 1318.6643 | 1318.6630 | 1.00  | 0    | (44)  | 0.0067   | 1    |        | K.QAQQTDPHPAVKA                                         |
| <a href="#">6641</a> | 664.3769 | 1326.7373 | 1326.7368 | 0.39  | 1    | 56    | 0.00014  | 1    |        | R.LRSDGLAFIGRA                                          |
| <a href="#">6692</a> | 673.3906 | 1344.7868 | 1344.7867 | -1.57 | 0    | 79    | 1e-006   | 1    |        | R.SVETVGMVLAVLKA                                        |
| <a href="#">6693</a> | 449.2637 | 1344.7894 | 1344.7867 | 0.61  | 0    | (45)  | 0.0027   | 1    |        | R.SVETVGMVLAVLKA                                        |

|      |                 |                  |                  |              |          |             |               |          |                                                    |
|------|-----------------|------------------|------------------|--------------|----------|-------------|---------------|----------|----------------------------------------------------|
| 6713 | 675.3207        | 1348.8268        | 1348.8259        | 0.87         | 0        | (52)        | 0.0013        | 1        | K.NAGYVPVTEEDRM                                    |
| 6718 | 675.8121        | 1349.8098        | 1349.8099        | -0.24        | 0        | 85          | 7e-005        | 1        | K.NAGYVPVTEEDRM + Deamidated (NQ)                  |
| 6728 | 451.5806        | 1351.7200        | 1351.7208        | -0.80        | 0        | (44)        | 0.0051        | 1        | R.NALPKPNAASGGGKA                                  |
| 6729 | 676.8683        | 1351.7220        | 1351.7208        | 0.92         | 0        | (53)        | 0.00082       | 1        | R.NALPKPNAASGGGKA                                  |
| 6732 | 451.9089        | 1352.7049        | 1352.7048        | 0.08         | 0        | (35)        | 0.042         | 1        | R.NALPKPNAASGGGKA + Deamidated (NQ)                |
| 6733 | 451.9095        | 1352.7067        | 1352.7048        | 1.44         | 0        | (52)        | 0.00085       | 1        | R.NALPKPNAASGGGKA + Deamidated (NQ)                |
| 6734 | 677.3608        | 1352.7071        | 1352.7048        | 1.73         | 0        | 54          | 0.00056       | 1        | R.NALPKPNAASGGGKA + Deamidated (NQ)                |
| 6736 | 452.5940        | 1354.7802        | 1354.7809        | -0.47        | 0        | (46)        | 0.0022        | 1        | K.LAEIWEGILGVRLA                                   |
| 6737 | 678.3682        | 1354.7819        | 1354.7809        | 0.79         | 0        | 79          | 1.1e-006      | 1        | K.LAEIWEGILGVRLA                                   |
| 6751 | 454.5963        | 1360.7840        | 1360.7836        | 0.31         | 0        | (52)        | 0.00074       | 1        | R.SVETVWGLAVLKA + Oxidation (M)                    |
| 6752 | 681.3895        | 1360.7845        | 1360.7836        | 0.87         | 0        | (81)        | 9.9e-005      | 1        | R.SVETVWGLAVLKA + Oxidation (M)                    |
| 6758 | 682.3704        | 1362.7263        | 1362.7251        | 0.88         | 0        | 56          | 0.00041       | 1        | R.SAEVMVSLGVMIKA                                   |
| 6781 | 685.8763        | 1369.7361        | 1369.7354        | 0.49         | 0        | 92          | 8.8e-008      | 1        | R.LAQFEQPSVLPGRLL                                  |
| 6787 | 686.8546        | 1371.6945        | 1371.6969        | -1.70        | 0        | (53)        | 0.00097       | 1        | K.ISSYSMLHHVAK.F                                   |
| 6804 | 690.3672        | 1378.7198        | 1378.7200        | -0.13        | 0        | (55)        | 0.00054       | 1        | R.SAEVMVSLGVMIKA + Oxidation (M)                   |
| 6805 | 690.3677        | 1378.7208        | 1378.7200        | 0.59         | 0        | (46)        | 0.0038        | 1        | R.SAEVMVSLGVMIKA + Oxidation (M)                   |
| 6835 | 463.6713        | 1387.8921        | 1387.8918        | 0.24         | 0        | (43)        | 0.011         | 1        | K.ISSYSMLHHVAK.F + Oxidation (M)                   |
| 6836 | 694.8535        | 1387.8925        | 1387.8918        | 0.49         | 0        | 84          | 8.6e-007      | 1        | K.ISSYSMLHHVAK.F + Oxidation (M)                   |
| 6860 | 698.3656        | 1394.7168        | 1394.7149        | 1.24         | 0        | (47)        | 0.0035        | 1        | R.SAEVMVSLGVMIKA + 2 Oxidation (M)                 |
| 6909 | <b>708.8689</b> | <b>1415.7192</b> | <b>1415.7197</b> | <b>-0.38</b> | <b>0</b> | <b>(37)</b> | <b>0.039</b>  | <b>2</b> | <b>R.WLPDGNIEFLGR.I</b>                            |
| 6910 | 708.8674        | 1415.7202        | 1415.7197        | 0.32         | 0        | (52)        | 0.0014        | 1        | R.WLPDGNIEFLGR.I                                   |
| 6911 | 708.8680        | 1415.7215        | 1415.7197        | 1.28         | 0        | (36)        | 0.046         | 1        | R.WLPDGNIEFLGR.I                                   |
| 6912 | 709.3592        | 1416.7039        | 1416.7038        | 0.14         | 0        | 55          | 0.00081       | 1        | R.WLPDGNIEFLGR.I + Deamidated (NQ)                 |
| 6914 | 709.3813        | 1416.7480        | 1416.7473        | 0.49         | 0        | 55          | 0.00087       | 1        | R.GYLNRPQLTAER.F                                   |
| 6917 | 709.8717        | 1417.7288        | 1417.7313        | -1.78        | 0        | (40)        | 0.02          | 1        | R.GYLNRPQLTAER.F + Deamidated (NQ)                 |
| 6979 | 480.6987        | 1438.8873        | 1438.8874        | -0.12        | 1        | 82          | 9.9e-005      | 1        | K.QDMYPLSSAQKRM + Oxidation (M)                    |
| 6980 | 720.3516        | 1438.8888        | 1438.8874        | 0.78         | 1        | (44)        | 0.0071        | 1        | K.QDMYPLSSAQKRM + Oxidation (M)                    |
| 7004 | 728.3672        | 1450.7198        | 1450.7164        | 2.35         | 2        | 70          | 2.2e-005      | 1        | R.GYLNREDETAQR.F                                   |
| 7018 | 486.9180        | 1457.7282        | 1457.7283        | -0.04        | 0        | 57          | 0.00034       | 1        | K.TVHQLFEETAQR.H                                   |
| 7019 | 729.8751        | 1457.7357        | 1457.7283        | 6.45         | 0        | (54)        | 0.00071       | 1        | K.TVHQLFEETAQR.H                                   |
| 7023 | 730.3624        | 1458.7103        | 1458.7103        | 0.01         | 0        | (39)        | 0.027         | 1        | K.TVHQLFEETAQR.H + Deamidated (NQ)                 |
| 7031 | 730.8457        | 1459.8788        | 1459.8732        | 2.82         | 0        | 84          | 7.3e-007      | 1        | K.YNGAAFDSAFIER.T                                  |
| 7043 | 733.3410        | 1464.8674        | 1464.8667        | 0.50         | 0        | (48)        | 0.0039        | 1        | R.TSFMEANGPEVQR.I                                  |
| 7046 | 733.8336        | 1465.8526        | 1465.8507        | 1.28         | 0        | (57)        | 0.0003        | 1        | R.TSFMEANGPEVQR.I + Deamidated (NQ)                |
| 7073 | 370.9950        | 1479.8308        | 1479.8310        | -0.18        | 0        | (44)        | 0.0028        | 1        | R.TVVFHQQLQKPR.Q                                   |
| 7074 | 484.2843        | 1479.8310        | 1479.8310        | -0.04        | 0        | (38)        | 0.013         | 1        | R.TVVFHQQLQKPR.Q                                   |
| 7075 | 740.8246        | 1479.8347        | 1479.8310        | 2.47         | 0        | 59          | 9.9e-005      | 1        | R.TVVFHQQLQKPR.Q                                   |
| 7077 | 494.5616        | 1480.8628        | 1480.8618        | 0.80         | 0        | (36)        | 0.046         | 1        | R.TSFMEANGPEVQR.I + Oxidation (M)                  |
| 7078 | 741.3394        | 1480.8642        | 1480.8618        | 1.71         | 0        | (81)        | 0.00015       | 1        | R.TSFMEANGPEVQR.I + Oxidation (M)                  |
| 7083 | 741.8306        | 1481.8466        | 1481.8456        | 0.64         | 0        | 63          | 7e-005        | 1        | R.TSFMEANGPEVQR.I + Deamidated (NQ); Oxidation (M) |
| 7089 | 495.2928        | 1482.8567        | 1482.8558        | 0.61         | 1        | (50)        | 0.0007        | 1        | K.KLAIEWEGILGVR.A                                  |
| 7090 | 742.4398        | 1482.8588        | 1482.8558        | 1.88         | 1        | 53          | 0.00032       | 1        | K.KLAIEWEGILGVR.A                                  |
| 7142 | 504.2580        | 1509.7463        | 1509.7463        | -0.02        | 1        | (54)        | 0.0009        | 1        | K.ETAKEWSEYVLR.L                                   |
| 7143 | 755.8909        | 1509.7472        | 1509.7463        | 0.58         | 1        | 55          | 0.00073       | 1        | K.ETAKEWSEYVLR.L                                   |
| 7156 | 506.2790        | 1515.8151        | 1515.8158        | -0.40        | 0        | 75          | 5.9e-006      | 1        | K.TLQALIEHDLAR.M                                   |
| 7217 | 512.2632        | 1533.7879        | 1533.7875        | 0.28         | 0        | (43)        | 0.014         | 1        | K.EQQTFABELLEQAK.Q                                 |
| 7218 | 767.8925        | 1533.7704        | 1533.7875        | 1.90         | 0        | 57          | 0.00053       | 1        | K.EQQTFABELLEQAK.Q                                 |
| 7222 | 768.3283        | 1534.6421        | 1534.8399        | 1.44         | 0        | 43          | 0.0055        | 1        | K.TDFFEP8AFDQGR.Q + Oxidation (M)                  |
| 7224 | 768.3722        | 1534.7298        | 1534.7272        | 1.71         | 0        | (93)        | 1.3e-007      | 1        | R.MMEAAVDQPAAFVRE                                  |
| 7225 | 768.3832        | 1534.7519        | 1534.7515        | 0.30         | 0        | (42)        | 0.017         | 1        | K.EQQTFABELLEQAK.Q + Deamidated (NQ)               |
| 7258 | 776.3694        | 1550.7242        | 1550.7221        | 1.35         | 0        | 94          | 7.9e-008      | 1        | R.MMEAAVDQPAAFVRE + Oxidation (M)                  |
| 7259 | 776.3698        | 1550.7251        | 1550.7221        | 1.90         | 0        | (78)        | 5.2e-006      | 1        | R.MMEAAVDQPAAFVRE + Oxidation (M)                  |
| 7277 | 780.9117        | 1559.8069        | 1559.8051        | 2.46         | 0        | (57)        | 0.00041       | 1        | K.GMMLJANIAELEKS                                   |
| 7283 | 523.2483        | 1568.7172        | 1568.7170        | 0.10         | 0        | (45)        | 0.0057        | 1        | R.MMEAAVDQPAAFVRE + 2 Oxidation (M)                |
| 7284 | 784.3688        | 1568.7190        | 1568.7170        | 1.23         | 0        | (58)        | 0.00027       | 1        | R.MMEAAVDQPAAFVRE + 2 Oxidation (M)                |
| 7295 | 784.3688        | 1568.7190        | 1568.7170        | 1.23         | 0        | (59)        | 0.00024       | 1        | R.MMEAAVDQPAAFVRE + 2 Oxidation (M)                |
| 7296 | 784.3688        | 1568.7190        | 1568.7170        | 1.23         | 0        | (80)        | 0.00018       | 1        | R.MMEAAVDQPAAFVRE + 2 Oxidation (M)                |
| 7313 | 788.3819        | 1574.7492        | 1574.7484        | 1.82         | 0        | 57          | 0.00058       | 1        | K.ALPEPDIEAGSGEYKA                                 |
| 7315 | 788.9088        | 1575.7990        | 1575.8000        | -0.61        | 0        | (54)        | 0.001         | 1        | K.GMMLJANIAELEKS + Oxidation (M)                   |
| 7316 | 788.9074        | 1575.8003        | 1575.8000        | 0.17         | 0        | 75          | 8.9e-006      | 1        | K.GMMLJANIAELEKS + Oxidation (M)                   |
| 7326 | 791.9157        | 1581.8169        | 1581.8151        | 1.12         | 0        | 85          | 6.5e-005      | 1        | K.AGAAVYPLDPALPGDR.L                               |
| 7327 | 528.2800        | 1581.8183        | 1581.8151        | 2.00         | 0        | (55)        | 0.00073       | 1        | K.AGAAVYPLDPALPGDR.L                               |
| 7333 | 396.9314        | 1583.8984        | 1583.8984        | -0.03        | 0        | (36)        | 0.046         | 1        | K.VHYEDISHADENR.Q                                  |
| 7334 | 792.8555        | 1583.8985        | 1583.8984        | 0.05         | 0        | 71          | 1.5e-005      | 1        | K.VHYEDISHADENR.Q                                  |
| 7335 | 528.9084        | 1583.8973        | 1583.8984        | 0.54         | 0        | (48)        | 0.0031        | 1        | K.VHYEDISHADENR.Q                                  |
| 7336 | 528.9084        | 1583.8973        | 1583.8984        | 0.54         | 0        | (48)        | 0.0029        | 1        | K.VHYEDISHADENR.Q                                  |
| 7386 | 798.9072        | 1591.7999        | 1591.7949        | 3.13         | 0        | (53)        | 0.00013       | 1        | K.GMMLJANIAELEKS + 2 Oxidation (M)                 |
| 7375 | 801.8782        | 1601.7378        | 1601.7382        | 0.98         | 0        | 56          | 0.00052       | 1        | U KEYSFTWDETLVGR.I                                 |
| 7439 | 813.3225        | 1624.8303        | 1624.8277        | 1.81         | 0        | (54)        | 0.00022       | 1        | K.QDNEEAEYSWSERL + Gln->pyro-Glu (N-term Q)        |
| 7455 | 816.3839        | 1630.7732        | 1630.7701        | 1.87         | 0        | 54          | 0.0011        | 1        | R.FVENPYPGSLMYKT                                   |
| 7475 | 548.9421        | 1637.8048        | 1637.8049        | -0.20        | 0        | (40)        | 0.024         | 1        | R.TPANGQGGKPYSDYIKW                                |
| 7478 | 819.9107        | 1637.8069        | 1637.8049        | 1.19         | 0        | (58)        | 0.00036       | 1        | R.TPANGQGGKPYSDYIKW                                |
| 7484 | 820.4017        | 1638.7888        | 1638.7889        | -0.08        | 0        | 86          | 5.3e-005      | 1        | R.TPANGQGGKPYSDYIKW + Deamidated (NQ)              |
| 7485 | 820.4017        | 1638.7888        | 1638.7889        | -0.01        | 0        | (51)        | 0.0018        | 1        | R.TPANGQGGKPYSDYIKW + Deamidated (NQ)              |
| 7499 | 821.8357        | 1641.8568        | 1641.8543        | 1.58         | 0        | 86          | 2.7e-007      | 1        | K.QDNEEAEYSWSERL                                   |
| 7508 | 824.3901        | 1646.7857        | 1646.7850        | 0.42         | 0        | (43)        | 0.014         | 1        | R.FVENPYPGSLMYKT + Oxidation (M)                   |
| 7514 | 550.8090        | 1648.8050        | 1648.8057        | -0.39        | 0        | (74)        | 1.3e-005      | 1        | K.YASQDDIIVGSPTAGRT                                |
| 7515 | 825.4100        | 1648.8054        | 1648.8057        | -0.17        | 0        | 76          | 7.3e-006      | 1        | K.YASQDDIIVGSPTAGRT                                |
| 7516 | <b>825.4114</b> | <b>1648.8082</b> | <b>1648.8057</b> | <b>1.54</b>  | <b>0</b> | <b>(47)</b> | <b>0.0081</b> | <b>3</b> | <b>K.YASQDDIIVGSPTAGRT</b>                         |
| 7522 | 825.9020        | 1649.7894        | 1649.7897        | -0.16        | 0        | (82)        | 0.00021       | 1        | K.YASQDDIIVGSPTAGRT + Deamidated (NQ)              |
| 7523 | 550.9388        | 1649.7947        | 1649.7937        | 0.82         | 0        | 43          | 0.014         | 1        | K.ETYTPADIEAHYIKE                                  |
| 7524 | 825.9053        | 1649.7961        | 1649.7937        | 1.48         | 0        | (40)        | 0.032         | 1        | K.ETYTPADIEAHYIKE                                  |
| 7548 | 553.6107        | 1657.8103        | 1657.8094        | 0.59         | 0        | (59)        | 3e-005        | 1        | R.AQGAGNEDIVAVMDR.S                                |
| 7549 | 829.9128        | 1657.8110        | 1657.8094        | 1.00         | 0        | 115         | 8.2e-010      | 1        | R.AQGAGNEDIVAVMDR.S                                |
| 7550 | 830.4080        | 1658.7975        | 1658.7934        | 2.47         | 0        | (53)        | 0.0012        | 1        | R.AQGAGNEDIVAVMDR.S + Deamidated (NQ)              |
| 7558 | 556.3036        | 1665.8889        | 1665.8872        | 1.05         | 0        | (80)        | 1.8e-006      | 1        | K.LNMAEHVTEAAVIR.K                                 |
| 7559 | 834.4531        | 1666.8917        | 1666.8712        | 12.3         | 0        | (58)        | 0.0003        | 1        | K.LNMAEHVTEAAVIR.K + Deamidated (NQ)               |
| 7561 | 556.9980        | 1667.9721        | 1667.9723        | -0.08        | 0        | (40)        | 0.0044        | 1        | R.HLIIGGDALVPHIVSKV                                |
| 7562 | 418.0005        | 1667.9727        | 1667.9723        | 0.28         | 0        | (42)        | 0.0031        | 1        | R.HLIIGGDALVPHIVSKV                                |
| 7563 | 834.9940        | 1667.9734        | 1667.9723        | 0.68         | 0        | 43          | 0.0023        | 1        | R.HLIIGGDALVPHIVSKV                                |
| 7580 | 836.9299        | 1671.8453        | 1671.8501        | -2.88        | 0        | 70          | 2.4e-005      | 1        | U K.ALAVPETALEESLGR.I + Propionamide (C)           |
| 7581 | 419.2133        | 1672.8238        | 1672.8281        | -2.49        | 0        | (55)        | 0.0007        | 1        | R.ELDEQANQLAHLR.A                                  |

|      |           |           |           |       |   |       |          |   |                                                          |
|------|-----------|-----------|-----------|-------|---|-------|----------|---|----------------------------------------------------------|
| 7582 | 568.6180  | 1672.8263 | 1672.8261 | -1.10 | 0 | (80)  | 0.00026  | 1 | RELDEQANQLAHHLRA                                         |
| 7583 | 837.4211  | 1672.8277 | 1672.8281 | -0.22 | 0 | 89    | 2.8e-007 | 1 | RELDEQANQLAHHLRA                                         |
| 7586 | 837.9098  | 1673.8050 | 1673.8043 | 0.45  | 0 | (91)  | 2.3e-007 | 1 | R.AQGAGNEDVAVIMDR.S + Oxidation (M)                      |
| 7587 | 837.9117  | 1673.8088 | 1673.8043 | 2.71  | 0 | (94)  | 1.1e-007 | 1 | R.AQGAGNEDVAVIMDR.S + Oxidation (M)                      |
| 7588 | 568.9446  | 1673.8121 | 1673.8121 | -0.01 | 0 | (54)  | 0.00099  | 1 | RELDEQANQLAHHLRA + Deamidated (NQ)                       |
| 7589 | 568.9446  | 1673.8125 | 1673.8121 | 0.21  | 0 | (56)  | 0.00089  | 1 | RELDEQANQLAHHLRA + Deamidated (NQ)                       |
| 7590 | 568.9461  | 1673.8134 | 1673.8121 | 0.78  | 0 | (41)  | 0.02     | 1 | RELDEQANQLAHHLRA + Deamidated (NQ)                       |
| 7600 | 840.9426  | 1679.8707 | 1679.8703 | 0.24  | 1 | 39    | 0.034    | 1 | R.DSLNQLVNRHESLR.T                                       |
| 7607 | 561.8280  | 1681.8561 | 1681.8383 | 10.8  | 1 | (37)  | 0.044    | 1 | R.DSLNQLVNRHESLR.T + 2 Deamidated (NQ)                   |
| 7609 | 561.8351  | 1681.8834 | 1681.8821 | 0.78  | 0 | 109   | 2.4e-009 | 1 | K.LNMAEHVTEAAVIR.K + Oxidation (M)                       |
| 7610 | 841.9497  | 1681.8849 | 1681.8821 | 1.84  | 0 | (81)  | 1.4e-006 | 1 | K.LNMAEHVTEAAVIR.K + Oxidation (M)                       |
| 7650 | 567.9579  | 1700.8518 | 1700.8522 | -0.20 | 1 | (87)  | 4.8e-005 | 1 | K.IKYNGAAFDSAFIER.T                                      |
| 7651 | 851.4341  | 1700.8536 | 1700.8522 | 0.83  | 1 | (53)  | 0.0013   | 1 | K.IKYNGAAFDSAFIER.T                                      |
| 7652 | 851.9249  | 1701.8352 | 1701.8362 | -0.59 | 1 | 72    | 1.6e-005 | 1 | K.IKYNGAAFDSAFIER.T + Deamidated (NQ)                    |
| 7653 | 598.2857  | 1701.8363 | 1701.8362 | -0.53 | 1 | (55)  | 0.00079  | 1 | K.IKYNGAAFDSAFIER.T + Deamidated (NQ)                    |
| 7679 | 856.9293  | 1711.8441 | 1711.8417 | 1.40  | 0 | 85    | 9e-005   | 1 | K.AGAAFLPIDPETPEER.I                                     |
| 7680 | 856.9638  | 1711.9131 | 1711.9145 | -0.82 | 0 | 80    | 1.7e-006 | 1 | R.NLAYVYVTSGTTGPKP.KG                                    |
| 7681 | 571.8452  | 1711.9138 | 1711.9145 | -0.41 | 0 | (53)  | 0.00075  | 1 | R.NLAYVYVTSGTTGPKP.KG                                    |
| 7688 | 857.4542  | 1712.8939 | 1712.8985 | -2.88 | 0 | (47)  | 0.0041   | 1 | R.NLAYVYVTSGTTGPKP.KG + Deamidated (NQ)                  |
| 7694 | 856.4115  | 1716.8094 | 1716.8108 | -1.35 | 0 | 89    | 2.9e-007 | 1 | K.AGAAFLPIDPYDQ.R.I                                      |
| 7719 | 871.9189  | 1741.8173 | 1741.8172 | 0.07  | 0 | 82    | 0.00019  | 1 | R.QASYQQHYVPSPAQR.L + Gln->pyro-Glu (N-term C)           |
| 7720 | 581.8133  | 1741.8182 | 1741.8172 | 0.55  | 0 | (47)  | 0.0085   | 1 | R.QASYQQHYVPSPAQR.L + Gln->pyro-Glu (N-term C)           |
| 7725 | 875.3950  | 1748.7755 | 1748.7754 | 0.05  | 0 | 83    | 1.2e-006 | 1 | U K.DFAVWQNEAEQQR.M                                      |
| 7744 | 880.4291  | 1758.8437 | 1758.8438 | -0.02 | 0 | (56)  | 0.00074  | 1 | R.QASYQQHYVPSPAQR.L                                      |
| 7745 | 587.2887  | 1758.8443 | 1758.8438 | 0.29  | 0 | (39)  | 0.034    | 1 | R.QASYQQHYVPSPAQR.L                                      |
| 7796 | 599.0010  | 1793.9811 | 1793.9821 | -0.58 | 1 | 74    | 5.2e-006 | 1 | K.LNMAEHVTEAAVIR.K.N                                     |
| 7797 | 449.5029  | 1793.9824 | 1793.9821 | 0.13  | 1 | (50)  | 0.0013   | 1 | K.LNMAEHVTEAAVIR.K.N                                     |
| 7816 | 903.4382  | 1804.8839 | 1804.8866 | -1.50 | 0 | (80)  | 0.0003   | 1 | R.TSDFMIDGVEVQTVH.K.N                                    |
| 7817 | 802.8302  | 1804.8867 | 1804.8866 | 1.20  | 0 | (54)  | 0.0013   | 1 | R.TSDFMIDGVEVQTVH.K.N                                    |
| 7819 | 802.8350  | 1804.8832 | 1804.8818 | 0.79  | 0 | 53    | 0.0016   | 1 | K.IYQGADMLPQIHYK.D                                       |
| 7821 | 904.5288  | 1807.0390 | 1807.0356 | 1.90  | 1 | (39)  | 0.0049   | 1 | R.LAGFEQPSVLPGR.LPV.KK                                   |
| 7822 | 803.3537  | 1807.0393 | 1807.0356 | 2.03  | 1 | 45    | 0.0011   | 1 | R.LAGFEQPSVLPGR.LPV.KK                                   |
| 7827 | 804.3309  | 1809.9708 | 1809.9771 | -3.47 | 1 | (40)  | 0.014    | 1 | K.LNMAEHVTEAAVIR.K.N + Oxidation (M)                     |
| 7828 | 804.3309  | 1809.9708 | 1809.9771 | -3.47 | 1 | (40)  | 0.015    | 1 | K.LNMAEHVTEAAVIR.K.N + Oxidation (M)                     |
| 7829 | 804.3309  | 1809.9710 | 1809.9771 | -3.37 | 1 | (35)  | 0.044    | 1 | K.LNMAEHVTEAAVIR.K.N + Oxidation (M)                     |
| 7830 | 804.3313  | 1809.9721 | 1809.9771 | -2.76 | 1 | (70)  | 1.5e-005 | 1 | K.LNMAEHVTEAAVIR.K.N + Oxidation (M)                     |
| 7832 | 483.5016  | 1809.9775 | 1809.9771 | 0.24  | 1 | (48)  | 0.0024   | 1 | K.LNMAEHVTEAAVIR.K.N + Oxidation (M)                     |
| 7833 | 905.9996  | 1809.9787 | 1809.9771 | 0.92  | 1 | (56)  | 0.00035  | 1 | K.LNMAEHVTEAAVIR.K.N + Oxidation (M)                     |
| 7840 | 907.4254  | 1812.8363 | 1812.8391 | -1.53 | 1 | 87    | 5.8e-007 | 1 | K.TKVHYEDISHADENR.Q                                      |
| 7841 | 454.2170  | 1812.8387 | 1812.8391 | -0.20 | 1 | (78)  | 4.3e-006 | 1 | K.TKVHYEDISHADENR.Q                                      |
| 7842 | 805.2670  | 1812.8391 | 1812.8391 | 0.04  | 1 | (79)  | 3.8e-006 | 1 | K.TKVHYEDISHADENR.Q                                      |
| 7856 | 909.9428  | 1817.8707 | 1817.8723 | -0.89 | 0 | 70    | 2.6e-005 | 1 | REEDIGLSFDYATALFK.D                                      |
| 7866 | 911.4380  | 1820.8614 | 1820.8615 | -0.04 | 0 | 87    | 7.2e-007 | 1 | R.TSDFMIDGVEVQTVH.K.N + Oxidation (M)                    |
| 7867 | 807.9615  | 1820.8628 | 1820.8615 | 0.63  | 0 | (58)  | 0.0006   | 1 | R.TSDFMIDGVEVQTVH.K.N + Oxidation (M)                    |
| 7868 | 911.4435  | 1820.8725 | 1820.8787 | -2.29 | 0 | (39)  | 0.047    | 1 | K.IYQGADMLPQIHYK.D + Oxidation (M)                       |
| 7869 | 807.9654  | 1820.8743 | 1820.8615 | 7.05  | 0 | (48)  | 0.0082   | 1 | R.TSDFMIDGVEVQTVH.K.N + Oxidation (M)                    |
| 7879 | 914.4787  | 1828.9428 | 1828.9414 | 0.77  | 0 | 93    | 1.2e-007 | 1 | U R.TPASTAVVYEGT.VLTYR.E                                 |
| 7903 | 919.4806  | 1838.9088 | 1838.9080 | -0.77 | 0 | (86)  | 7.5e-007 | 1 | R.HMTQITEATFAALFEK.Q                                     |
| 7904 | 613.3107  | 1838.9104 | 1838.9080 | 1.28  | 0 | (83)  | 1.5e-006 | 1 | R.HMTQITEATFAALFEK.Q                                     |
| 7925 | 826.4774  | 1850.9403 | 1850.9414 | -0.61 | 1 | 85    | 7.5e-005 | 1 | R.TAPAGDKTFAQFLEEV.KT                                    |
| 7926 | 617.9882  | 1850.9428 | 1850.9414 | 0.78  | 1 | (40)  | 0.025    | 1 | R.TAPAGDKTFAQFLEEV.KT                                    |
| 7927 | 618.0074  | 1851.0005 | 1851.0003 | 0.14  | 1 | 39    | 0.019    | 1 | K.AGAAVYPLDPALPGDR.LF                                    |
| 7929 | 618.3186  | 1851.9279 | 1851.9254 | 1.38  | 1 | (80)  | 0.0003   | 1 | R.TAPAGDKTFAQFLEEV.KT + Deamidated (NQ)                  |
| 7930 | 927.4584  | 1852.9022 | 1852.9029 | -0.40 | 0 | 87    | 8.8e-007 | 1 | R.HMTQITEATFAALFEK.Q + Oxidation (M)                     |
| 7945 | 932.0024  | 1861.9902 | 1861.9938 | -1.93 | 0 | 96    | 4.7e-008 | 1 | U K.LTPLSFHTVNTSSF.KD                                    |
| 7946 | 621.6721  | 1861.9944 | 1861.9938 | 0.29  | 0 | (43)  | 0.0092   | 1 | U K.LTPLSFHTVNTSSF.KD                                    |
| 7947 | 621.6724  | 1861.9953 | 1861.9938 | 0.78  | 0 | (49)  | 0.0021   | 1 | U K.LTPLSFHTVNTSSF.KD                                    |
| 7948 | 621.6724  | 1861.9953 | 1861.9938 | 0.78  | 0 | (48)  | 0.0024   | 1 | U K.LTPLSFHTVNTSSF.KD                                    |
| 7953 | 622.0005  | 1862.9798 | 1862.9778 | 1.08  | 0 | (81)  | 0.00018  | 1 | U K.LTPLSFHTVNTSSF.KD + Deamidated (NQ)                  |
| 7972 | 626.3146  | 1875.9219 | 1875.9214 | 0.28  | 0 | 41    | 0.029    | 1 | REENDIVQAYKPIGSEK.V                                      |
| 7991 | 949.5282  | 1897.0418 | 1897.0421 | -0.16 | 0 | 110   | 1.1e-009 | 1 | K.LVPPGASGQLYTTGQGLAR.G                                  |
| 7992 | 633.3549  | 1897.0429 | 1897.0421 | 0.41  | 0 | (35)  | 0.04     | 1 | K.LVPPGASGQLYTTGQGLAR.G                                  |
| 7993 | 633.3556  | 1897.0451 | 1897.0421 | 1.57  | 0 | (84)  | 4.7e-005 | 1 | K.LVPPGASGQLYTTGQGLAR.G                                  |
| 7994 | 949.5311  | 1897.0477 | 1897.0421 | 2.93  | 0 | (91)  | 8.4e-008 | 1 | K.LVPPGASGQLYTTGQGLAR.G                                  |
| 8040 | 961.0187  | 1920.0189 | 1920.0179 | 0.52  | 0 | (53)  | 0.0011   | 1 | R.ISTMWLTSPFLNQLAAK.D                                    |
| 8041 | 841.0138  | 1920.0195 | 1920.0179 | 0.88  | 0 | 85    | 8.7e-005 | 1 | R.ISTMWLTSPFLNQLAAK.D                                    |
| 8068 | 484.7903  | 1935.1321 | 1935.1306 | 0.82  | 2 | (29)  | 0.038    | 1 | R.LAGFEQPSVLPGR.LPV.KK.D                                 |
| 8070 | 968.5737  | 1935.1328 | 1935.1306 | 1.15  | 2 | 32    | 0.018    | 1 | R.LAGFEQPSVLPGR.LPV.KK.D                                 |
| 8073 | 969.0123  | 1936.0101 | 1936.0128 | -1.39 | 0 | (49)  | 0.0029   | 1 | R.ISTMWLTSPFLNQLAAK.D + Oxidation (M)                    |
| 8074 | 848.3444  | 1936.0114 | 1936.0128 | -0.71 | 0 | (55)  | 0.00079  | 1 | R.ISTMWLTSPFLNQLAAK.D + Oxidation (M)                    |
| 8076 | 969.5093  | 1937.0041 | 1936.9988 | 3.78  | 0 | (49)  | 0.0028   | 1 | R.ISTMWLTSPFLNQLAAK.D + Deamidated (NQ); Oxidation (M)   |
| 8078 | 647.3551  | 1939.0435 | 1939.0462 | -1.39 | 0 | 74    | 7.3e-006 | 1 | K.HLLLLDMHHIADGVS.R.G                                    |
| 8102 | 975.5175  | 1949.0205 | 1949.0218 | -0.88 | 0 | 98    | 3.5e-008 | 1 | K.QADQGPVEGEVILTPQR.W                                    |
| 8103 | 975.5194  | 1949.0241 | 1949.0218 | 1.20  | 0 | (89)  | 2.8e-007 | 1 | K.QADQGPVEGEVILTPQR.W                                    |
| 8104 | 850.6822  | 1949.0249 | 1949.0218 | 1.80  | 0 | (42)  | 0.016    | 1 | K.QADQGPVEGEVILTPQR.W                                    |
| 8107 | 488.2717  | 1949.0577 | 1949.0555 | 1.14  | 2 | 37    | 0.037    | 1 | R.LRDSLNLQVNRHESLR.T                                     |
| 8126 | 489.7677  | 1955.0416 | 1955.0411 | 0.25  | 0 | (55)  | 0.00088  | 1 | R.HLLLLDMHHIADGVS.R.G + Oxidation (M)                    |
| 8137 | 654.0419  | 1959.1040 | 1959.1013 | 1.34  | 1 | 40    | 0.009    | 1 | R.LENAIQLNRHILR.T                                        |
| 8183 | 682.0215  | 1983.0428 | 1983.0425 | 0.04  | 1 | (52)  | 0.0014   | 1 | U K.RTPASTAVVYEGT.VLTYR.E                                |
| 8184 | 982.5316  | 1983.0486 | 1983.0425 | 3.04  | 1 | 86    | 5.5e-007 | 1 | U K.RTPASTAVVYEGT.VLTYR.E                                |
| 8191 | 683.6744  | 1988.0013 | 1987.9997 | 0.83  | 1 | 56    | 0.00094  | 1 | K.LVEGLQKGETAAMNDR.S + Oxidation (M)                     |
| 8230 | 670.8684  | 2006.9773 | 2006.9775 | -0.10 | 1 | (78)  | 9.1e-006 | 1 | R.MEAKAQGTFAELLEQA.K.Q + Oxidation (M)                   |
| 8233 | 1005.9687 | 2009.9629 | 2009.9615 | 10.8  | 1 | 77    | 7.8e-006 | 1 | R.MEAKAQGTFAELLEQA.K.Q + Deamidated (NQ); Oxidation (M)  |
| 8243 | 1009.4761 | 2016.9377 | 2016.9350 | 1.35  | 0 | 56    | 0.001    | 1 | K.VSFEIVDLYSDEEMLR.S + Oxidation (M)                     |
| 8257 | 1014.9840 | 2027.9353 | 2027.9357 | 8.88  | 0 | 81    | 2.9e-006 | 1 | R.NMTAIGQYEGTIVSLDDGK.W + Deamidated (NQ); Oxidation (M) |
| 8258 | 678.9646  | 2027.9619 | 2027.9622 | -0.17 | 0 | 56    | 0.0011   | 1 | K.AELPEGMVAHVQFEEQA.K.R + Oxidation (M)                  |
| 8259 | 1014.9899 | 2027.9652 | 2027.9622 | 1.46  | 0 | (55)  | 0.0013   | 1 | K.AELPEGMVAHVQFEEQA.K.R + Oxidation (M)                  |
| 8265 | 1016.5231 | 2031.0317 | 2031.0371 | -2.67 | 0 | 126   | 8.3e-011 | 1 | R.LSDVLLSSAETAALLEER.H                                   |
| 8266 | 678.0201  | 2031.0386 | 2031.0371 | 0.71  | 0 | (102) | 1.9e-008 | 1 | R.LSDVLLSSAETAALLEER.H                                   |
| 8280 | 1021.5982 | 2041.1839 | 2041.1857 | -0.86 | 0 | (36)  | 0.0096   | 1 | R.VGVLTKPSLEMSAAVLSV.LKA                                 |
| 8282 | 681.4031  | 2041.1878 | 2041.1857 | 0.83  | 0 | (89)  | 4.9e-006 | 1 | R.VGVLTKPSLEMSAAVLSV.LKA                                 |
| 8298 | 684.8948  | 2051.0628 | 2051.0623 | 0.18  | 0 | (49)  | 0.0042   | 1 | R.THPDLGGVPMFVNTVALR.T                                   |

|      |           |           |           |       |   |       |          |   |                                                                        |
|------|-----------|-----------|-----------|-------|---|-------|----------|---|------------------------------------------------------------------------|
| 8301 | 1027.0438 | 2052.0731 | 2052.0463 | 13.1  | 0 | (41)  | 0.021    | 1 | R.THPDLQGVPGMFVNTVALR.T + Deamidated (NQ)                              |
| 8311 | 686.3899  | 2066.1478 | 2056.1469 | 0.45  | 1 | 36    | 0.029    | 1 | K.IKEFIRPFDLNDAPLIRA                                                   |
| 8314 | 686.7346  | 2057.1819 | 2057.1808 | 0.61  | 0 | 71    | 3.8e-006 | 1 | R.VGLVTKPSEMSAAVLSVLKA + Oxidation (M)                                 |
| 8315 | 1029.5982 | 2057.1839 | 2057.1806 | 1.62  | 0 | (89)  | 5.1e-006 | 1 | R.VGLVTKPSEMSAAVLSVLKA + Oxidation (M)                                 |
| 8316 | 515.3033  | 2057.1840 | 2057.1808 | 1.66  | 0 | (48)  | 0.00074  | 1 | R.VGLVTKPSEMSAAVLSVLKA + Oxidation (M)                                 |
| 8317 | 687.6710  | 2059.9911 | 2059.9884 | 1.27  | 0 | (40)  | 0.038    | 1 | R.QVSGESEALYALFSFGMIR.N + Oxidation (M)                                |
| 8318 | 1031.0045 | 2059.9945 | 2059.9884 | 2.94  | 0 | 67    | 6.8e-005 | 1 | R.QVSGESEALYALFSFGMIR.N + Oxidation (M)                                |
| 8329 | 690.0285  | 2067.0578 | 2067.0572 | 0.23  | 0 | (56)  | 0.00075  | 1 | R.THPDLQGVPGMFVNTVALR.T + Oxidation (M)                                |
| 8331 | 1034.5380 | 2067.0614 | 2067.0572 | 2.03  | 0 | 61    | 0.00028  | 1 | R.THPDLQGVPGMFVNTVALR.T + Oxidation (M)                                |
| 8337 | 691.6651  | 2071.9735 | 2071.9698 | 1.77  | 1 | 47    | 0.008    | 1 | K.AEVDLHVFEAKEDEADQKI                                                  |
| 8352 | 695.3859  | 2083.1358 | 2083.1360 | -0.14 | 1 | 72    | 9.9e-006 | 1 | K.KHLLLDMMHIIADGVSR.G + Oxidation (M)                                  |
| 8353 | 521.7918  | 2083.1361 | 2083.1360 | 1.00  | 1 | (49)  | 0.0021   | 1 | K.KHLLLDMMHIIADGVSR.G + Oxidation (M)                                  |
| 8363 | 1046.0396 | 2090.0645 | 2090.0531 | 5.46  | 0 | 61    | 0.00029  | 1 | K.GGNTAIAAYTPESADIEALK.S                                               |
| 8365 | 1047.0124 | 2092.0103 | 2092.0061 | 1.05  | 0 | (84)  | 1.7e-006 | 1 | R.TNADVQDMPGMPVNTLALRM                                                 |
| 8374 | 701.0409  | 2100.1008 | 2100.0997 | 0.54  | 2 | (88)  | 4.2e-005 | 1 | R.KLVEQGLQKGETAJMNDR.S                                                 |
| 8394 | 703.6731  | 2107.9975 | 2108.0031 | -2.65 | 0 | (52)  | 0.0031   | 1 | R.TNADVQDMPGMPVNTLALRM + Oxidation (M)                                 |
| 8395 | 1055.0098 | 2108.0050 | 2108.0031 | 0.91  | 0 | 122   | 3e-010   | 1 | R.TNADVQDMPGMPVNTLALRM + Oxidation (M)                                 |
| 8396 | 1055.0099 | 2108.0052 | 2108.0031 | 1.03  | 0 | (90)  | 4.7e-007 | 1 | R.TNADVQDMPGMPVNTLALRM + Oxidation (M)                                 |
| 8406 | 706.3711  | 2116.0914 | 2116.0946 | -1.50 | 2 | (86)  | 9.7e-005 | 1 | R.KLVEQGLQKGETAJMNDR.S + Oxidation (M)                                 |
| 8409 | 1059.0561 | 2116.0977 | 2116.0946 | 1.48  | 2 | 74    | 1.3e-005 | 1 | R.KLVEQGLQKGETAJMNDR.S + Oxidation (M)                                 |
| 8411 | 706.6885  | 2117.0438 | 2117.0429 | 0.41  | 0 | 81    | 3.4e-006 | 1 | K.DLFQHPHTEELTQYVERA                                                   |
| 8412 | 1059.5303 | 2117.0460 | 2117.0429 | 1.45  | 0 | (80)  | 0.00039  | 1 | K.DLFQHPHTEELTQYVERA                                                   |
| 8413 | 530.2816  | 2117.0974 | 2117.0798 | 8.88  | 2 | (46)  | 0.0081   | 1 | R.KLVEQGLQKGETAJMNDR.S + Deamidated (NQ); Oxidation (M)                |
| 8418 | 709.0071  | 2123.9994 | 2123.9980 | 0.67  | 0 | (94)  | 2e-007   | 1 | R.TNADVQDMPGMPVNTLALRM + 2 Oxidation (M)                               |
| 8419 | 1063.0085 | 2124.0025 | 2123.9980 | 2.14  | 0 | (104) | 1.9e-008 | 1 | R.TNADVQDMPGMPVNTLALRM + 2 Oxidation (M)                               |
| 8420 | 709.6520  | 2125.9343 | 2125.9341 | 0.11  | 1 | (71)  | 2.6e-005 | 1 | K.WLQKQDNEEAEYSWSE.RL                                                  |
| 8421 | 709.6525  | 2125.9356 | 2125.9341 | 0.71  | 1 | (43)  | 0.018    | 1 | K.WLQKQDNEEAEYSWSE.RL                                                  |
| 8422 | 1063.9773 | 2125.9400 | 2125.9341 | 2.80  | 1 | 76    | 9.6e-006 | 1 | K.WLQKQDNEEAEYSWSE.RL                                                  |
| 8500 | 723.6989  | 2168.0749 | 2168.0684 | 3.00  | 1 | (41)  | 0.031    | 1 | K.AELPEGMVAHVQVFEQAKR.T                                                |
| 8504 | 544.3250  | 2173.2709 | 2173.2695 | 0.67  | 0 | (30)  | 0.027    | 1 | K.RPTGRIPRANAGALVLEAKL                                                 |
| 8505 | 725.4312  | 2173.2718 | 2173.2695 | 1.07  | 0 | 30    | 0.024    | 1 | K.RPTGRIPRANAGALVLEAKL                                                 |
| 8509 | 725.7584  | 2174.2533 | 2174.2535 | -0.10 | 0 | (30)  | 0.038    | 1 | K.RPTGRIPRANAGALVLEAKL + Deamidated (NQ)                               |
| 8511 | 1089.5228 | 2177.0311 | 2177.0317 | -0.28 | 0 | 47    | 0.0085   | 1 | K.GFTPEISFNYLQGFDESEVKT                                                |
| 8519 | 729.0283  | 2184.0631 | 2184.0633 | -0.09 | 1 | (70)  | 3.8e-005 | 1 | K.AELPEGMVAHVQVFEQAKR.T + Oxidation (M)                                |
| 8520 | 547.0231  | 2184.0634 | 2184.0633 | 0.04  | 1 | (39)  | 0.047    | 1 | K.AELPEGMVAHVQVFEQAKR.T + Oxidation (M)                                |
| 8521 | 1093.0409 | 2184.0672 | 2184.0633 | 1.79  | 1 | 96    | 9.4e-006 | 1 | K.AELPEGMVAHVQVFEQAKR.T + Oxidation (M)                                |
| 8533 | 1095.0355 | 2188.0565 | 2188.0549 | 0.73  | 0 | (76)  | 9.3e-006 | 1 | R.DAAFADIFAVQQHVAEAE.RY                                                |
| 8534 | 730.3602  | 2188.0569 | 2188.0549 | 1.82  | 0 | 83    | 2.2e-006 | 1 | R.DAAFADIFAVQQHVAEAE.RY                                                |
| 8553 | 1102.5414 | 2203.0682 | 2203.0645 | 1.69  | 0 | (72)  | 3e-005   | 1 | K.QEGISVPDSYTGVDVLLDGS.RT + Gln->pyro-Glu (N-term Q)                   |
| 8567 | 738.0734  | 2211.1983 | 2211.1939 | 1.97  | 1 | 50    | 0.002    | 1 | K.ELALLYKGEQLPEPALHYKD                                                 |
| 8568 | 1106.6083 | 2211.2020 | 2211.1939 | 3.67  | 1 | (49)  | 0.0023   | 1 | K.ELALLYKGEQLPEPALHYKD                                                 |
| 8571 | 738.3817  | 2212.1231 | 2212.1223 | 0.38  | 0 | (74)  | 1.3e-005 | 1 | K.AVADNPQPLSSLSLVTEK.Q                                                 |
| 8572 | 1107.0710 | 2212.1275 | 2212.1223 | 2.37  | 0 | 77    | 7.8e-006 | 1 | K.AVADNPQPLSSLSLVTEK.Q                                                 |
| 8577 | 741.0393  | 2220.0961 | 2220.0910 | 2.29  | 0 | (75)  | 1.3e-005 | 1 | K.QEGISVPDSYTGVDVLLDGS.RT                                              |
| 8578 | 1111.0564 | 2220.0982 | 2220.0910 | 3.28  | 0 | 82    | 2.8e-006 | 1 | K.QEGISVPDSYTGVDVLLDGS.RT                                              |
| 8583 | 742.7033  | 2225.0679 | 2225.0685 | 0.64  | 0 | (49)  | 0.0058   | 1 | K.ARPVATYNGQSWTYGELN.AKA                                               |
| 8594 | 1113.5533 | 2225.0621 | 2225.0685 | 2.53  | 0 | 67    | 8.5e-005 | 1 | K.ARPVATYNGQSWTYGELN.AKA                                               |
| 8598 | 743.0313  | 2228.0721 | 2228.0705 | 0.71  | 0 | (46)  | 0.012    | 1 | K.ARPVATYNGQSWTYGELN.AKA + Deamidated (NQ)                             |
| 8602 | 1118.0227 | 2234.0309 | 2234.0188 | 6.32  | 1 | 57    | 0.0011   | 1 | K.EQNTYKDEEYVLDVFKG                                                    |
| 8633 | 1129.0463 | 2256.0760 | 2256.0741 | 0.86  | 0 | (87)  | 1.1e-006 | 1 | R.SPLFSVMFMQNMIEPSLR.L + Oxidation (M)                                 |
| 8634 | 1129.0453 | 2256.0760 | 2256.0741 | 0.86  | 0 | 106   | 1.3e-006 | 1 | R.SPLFSVMFMQNMIEPSLR.L + Oxidation (M)                                 |
| 8637 | 763.3661  | 2267.0766 | 2267.0681 | 8.20  | 0 | (53)  | 0.0025   | 1 | R.SPLFSVMFMQNMIEPSLR.L + Deamidated (NQ); Oxidation (M)                |
| 8659 | 768.3633  | 2272.0662 | 2272.0690 | -0.36 | 0 | (46)  | 0.012    | 1 | R.SPLFSVMFMQNMIEPSLR.L + 2 Oxidation (M)                               |
| 8660 | 1137.0432 | 2272.0719 | 2272.0690 | 1.28  | 0 | (77)  | 9.8e-006 | 1 | R.SPLFSVMFMQNMIEPSLR.L + 2 Oxidation (M)                               |
| 8662 | 1137.0488 | 2272.0631 | 2272.0690 | 6.20  | 0 | (77)  | 8.5e-006 | 1 | R.SPLFSVMFMQNMIEPSLR.L + 2 Oxidation (M)                               |
| 8680 | 760.7377  | 2279.1912 | 2279.1910 | 0.08  | 1 | (85)  | 8e-005   | 1 | K.ALPVPTDKTVHQLFEETAQR.H                                               |
| 8681 | 1140.8035 | 2279.1925 | 2279.1910 | 0.68  | 1 | 67    | 4.9e-005 | 1 | K.ALPVPTDKTVHQLFEETAQR.H                                               |
| 8707 | 763.6962  | 2288.0667 | 2288.0639 | 1.20  | 0 | (80)  | 5e-006   | 1 | R.SPLFSVMFMQNMIEPSLR.L + 3 Oxidation (M)                               |
| 8708 | 1145.0427 | 2288.0709 | 2288.0639 | 3.04  | 0 | (103) | 2.3e-008 | 1 | R.SPLFSVMFMQNMIEPSLR.L + 3 Oxidation (M)                               |
| 8718 | 764.3801  | 2290.1184 | 2290.1158 | 1.14  | 0 | (56)  | 0.0013   | 1 | K.VESAFEGTSFDFNLVYPGKT                                                 |
| 8719 | 1146.0696 | 2290.1228 | 2290.1158 | 3.00  | 0 | 58    | 0.00084  | 1 | K.VESAFEGTSFDFNLVYPGKT                                                 |
| 8748 | 772.0554  | 2313.1444 | 2313.1488 | -1.90 | 2 | 56    | 0.0012   | 1 | K.AEVDLHVFEAKEDEADQKI.KE                                               |
| 8779 | 778.7296  | 2333.1668 | 2333.1427 | 10.4  | 0 | 45    | 0.015    | 1 | K.TASLQAFHQSYPLELEIKL + Deamidated (NQ)                                |
| 8780 | 778.7333  | 2333.1780 | 2333.1750 | 1.28  | 1 | (62)  | 0.00025  | 1 | K.DKGGNTAIAAYTPESADIEALK.S                                             |
| 8781 | 1167.5988 | 2333.1829 | 2333.1750 | 3.39  | 1 | 79    | 5.4e-006 | 1 | K.DKGGNTAIAAYTPESADIEALK.S                                             |
| 8799 | 784.3655  | 2350.0748 | 2350.0753 | -0.24 | 1 | 99    | 7.1e-006 | 1 | U K.DEYVNKEYSFTWDELTVGR.I                                              |
| 8800 | 1176.0501 | 2350.0655 | 2350.0753 | 4.34  | 1 | (76)  | 1.4e-005 | 1 | U K.DEYVNKEYSFTWDELTVGR.I                                              |
| 8811 | 785.3672  | 2363.1398 | 2363.1372 | 1.09  | 1 | (63)  | 0.00028  | 1 | R.NMTAIGQYEGTIVSLDDGKWR.N                                              |
| 8812 | 1177.5790 | 2363.1434 | 2363.1372 | 2.62  | 1 | (71)  | 4e-005   | 1 | R.NMTAIGQYEGTIVSLDDGKWR.N                                              |
| 8827 | 780.7175  | 2369.1308 | 2369.1322 | -0.59 | 1 | (91)  | 4.2e-007 | 1 | R.NMTAIGQYEGTIVSLDDGKWR.N + Oxidation (M)                              |
| 8828 | 1185.5768 | 2369.1390 | 2369.1322 | 2.89  | 1 | 102   | 3.1e-008 | 1 | R.NMTAIGQYEGTIVSLDDGKWR.N + Oxidation (M)                              |
| 8831 | 791.0524  | 2370.1353 | 2370.1162 | 8.07  | 1 | (75)  | 1.9e-005 | 1 | R.NMTAIGQYEGTIVSLDDGKWR.N + Deamidated (NQ); Oxidation (M)             |
| 8860 | 798.4048  | 2386.1925 | 2386.1951 | -1.06 | 0 | (50)  | 0.0041   | 1 | R.QLAAYMEASAVSGGHQVLKPADK.Q + Oxidation (M)                            |
| 8861 | 597.5070  | 2386.1967 | 2386.1951 | 1.52  | 0 | 51    | 0.0037   | 1 | R.QLAAYMEASAVSGGHQVLKPADK.Q + Oxidation (M)                            |
| 8868 | 1198.5985 | 2395.1825 | 2395.1763 | 2.58  | 0 | (92)  | 3.4e-007 | 1 | R.QTISYNNMPSVLLMEGELDIS.RL                                             |
| 8869 | 799.4019  | 2395.1839 | 2395.1763 | 3.19  | 0 | (42)  | 0.031    | 1 | R.QTISYNNMPSVLLMEGELDIS.RL                                             |
| 8914 | 1206.0620 | 2410.1495 | 2410.1396 | 4.11  | 0 | (58)  | 0.00082  | 1 | R.QTISYNNMPSVLLMEGELDIS.RL + Gln->pyro-Glu (N-term Q); 2 Oxidation (M) |
| 8916 | 1206.5955 | 2411.1784 | 2411.1712 | 2.14  | 0 | (79)  | 5.8e-006 | 1 | R.QTISYNNMPSVLLMEGELDIS.RL + Oxidation (M)                             |
| 8918 | 1206.5983 | 2411.1820 | 2411.1712 | 4.47  | 0 | 105   | 1.8e-006 | 1 | R.QTISYNNMPSVLLMEGELDIS.RL + Oxidation (M)                             |
| 8920 | 805.0653  | 2412.1741 | 2412.1652 | 7.82  | 0 | (80)  | 4.5e-006 | 1 | R.QTISYNNMPSVLLMEGELDIS.RL + Deamidated (NQ); Oxidation (M)            |
| 8946 | 810.0620  | 2427.1642 | 2427.1661 | -0.80 | 0 | (99)  | 6.8e-006 | 1 | R.QTISYNNMPSVLLMEGELDIS.RL + 2 Oxidation (M)                           |
| 8947 | 1214.5947 | 2427.1749 | 2427.1661 | 3.61  | 0 | (91)  | 4.4e-007 | 1 | R.QTISYNNMPSVLLMEGELDIS.RL + 2 Oxidation (M)                           |
| 8957 | 811.7336  | 2432.1789 | 2432.1747 | 1.73  | 1 | 73    | 2.8e-005 | 1 | R.EEDIGLSFDYATLAKOETIR.R                                               |
| 9007 | 827.3996  | 2479.1678 | 2479.1543 | 5.45  | 2 | 59    | 0.00073  | 1 | U K.DEYVNKEYSFTWDELTVGR.I + Deamidated (NQ)                            |
| 9020 | 831.7914  | 2492.3525 | 2492.3540 | -0.80 | 0 | (53)  | 0.00087  | 1 | K.TANLHQVTGNLQAVWGVLSK.Y                                               |
| 9021 | 831.7921  | 2492.3545 | 2492.3540 | 0.21  | 0 | (58)  | 0.00041  | 1 | K.TANLHQVTGNLQAVWGVLSK.Y                                               |
| 9022 | 831.7926  | 2492.3560 | 2492.3540 | 0.80  | 0 | 79    | 2e-006   | 1 | K.TANLHQVTGNLQAVWGVLSK.Y                                               |
| 9023 | 831.7927  | 2492.3562 | 2492.3540 | 0.87  | 0 | (66)  | 2.3e-005 | 1 | K.TANLHQVTGNLQAVWGVLSK.Y                                               |
| 9024 | 831.7929  | 2492.3567 | 2492.3540 | 1.10  | 0 | (49)  | 0.0018   | 1 | K.TANLHQVTGNLQAVWGVLSK.Y                                               |
| 9028 | 1247.1898 | 2492.3628 | 2492.3540 | 3.47  | 0 | (85)  | 4.8e-005 | 1 | K.TANLHQVTGNLQAVWGVLSK.Y                                               |
| 9033 | 834.0620  | 2498.1640 | 2498.1652 | -0.49 | 0 | (43)  | 0.033    | 1 | K.ELPAPQSEAVQPEYAAPETSEK.K                                             |
| 9034 | 1260.8919 | 2498.1693 | 2498.1652 | 1.62  | 0 | 67    | 0.00012  | 1 | K.ELPAPQSEAVQPEYAAPETSEK.K                                             |



|      |           |           |           |       |   |      |          |   |                                                                                                        |
|------|-----------|-----------|-----------|-------|---|------|----------|---|--------------------------------------------------------------------------------------------------------|
| 9122 | 648.0774  | 2588.2805 | 2588.2758 | 1.79  | 2 | 43   | 0.029    | 1 | REEDIGLSFDYATALKDETRR.W                                                                                |
| 9143 | 889.4207  | 2805.2401 | 2805.2383 | 0.88  | 0 | 90   | 6.4e-007 | 1 | K.MYGHTEFINHYGPTTEATIGAIAGR.V                                                                          |
| 9156 | 874.7624  | 2821.2353 | 2821.2333 | 0.78  | 0 | (85) | 1.9e-006 | 1 | K.MYGHTEFINHYGPTTEATIGAIAGR.V + Oxidation (M)                                                          |
| 9157 | 656.3162  | 2821.2358 | 2821.2333 | 0.98  | 0 | (49) | 0.008    | 1 | K.MYGHTEFINHYGPTTEATIGAIAGR.V + Oxidation (M)                                                          |
| 9158 | 1311.6276 | 2821.2408 | 2821.2333 | 2.79  | 0 | (70) | 6.5e-005 | 1 | K.MYGHTEFINHYGPTTEATIGAIAGR.V + Oxidation (M)                                                          |
| 9217 | 895.1620  | 2882.4341 | 2882.4327 | 0.82  | 0 | (89) | 2.8e-007 | 1 | R.IELSEIEVQLAQLSEVQDAAVTAVKD                                                                           |
| 9218 | 1342.2296 | 2882.4427 | 2882.4327 | 3.74  | 0 | 92   | 1.4e-007 | 1 | R.IELSEIEVQLAQLSEVQDAAVTAVKD                                                                           |
| 9223 | 896.8180  | 2887.4323 | 2887.4382 | -2.17 | 1 | 113  | 1.3e-009 | 1 | K.LLLKQEGISVPDSYTGVDVLLDGSRT                                                                           |
| 9224 | 1344.7304 | 2887.4461 | 2887.4382 | 2.97  | 1 | (96) | 6.3e-008 | 1 | K.LLLKQEGISVPDSYTGVDVLLDGSRT                                                                           |
| 9256 | 1363.6788 | 2725.3431 | 2725.3417 | 0.53  | 0 | (43) | 0.034    | 1 | K.SLMAETDTTMMFLAFAFNLLSKY + Oxidation (M)                                                              |
| 9257 | 908.4581  | 2725.3463 | 2725.3417 | 1.71  | 0 | (46) | 0.014    | 1 | K.SLMAETDTTMMFLAFAFNLLSKY + Oxidation (M)                                                              |
| 9270 | 914.7867  | 2741.3382 | 2741.3368 | 0.80  | 0 | (45) | 0.021    | 1 | K.SLMAETDTTMMFLAFAFNLLSKY + 2 Oxidation (M)                                                            |
| 9280 | 888.3405  | 2749.3330 | 2749.3282 | 1.73  | 1 | (43) | 0.035    | 1 | R.KMYGHTEFINHYGPTTEATIGAIAGR.V + Oxidation (M)                                                         |
| 9282 | 917.7830  | 2750.3271 | 2750.3122 | 5.39  | 1 | 53   | 0.0032   | 1 | R.KMYGHTEFINHYGPTTEATIGAIAGR.V + Deamidated (NQ); Oxidation (M)                                        |
| 9286 | 920.1189  | 2757.3288 | 2757.3315 | -0.97 | 0 | 55   | 0.0024   | 1 | K.SLMAETDTTMMFLAFAFNLLSKY + 3 Oxidation (M)                                                            |
| 9310 | 928.5087  | 2782.4961 | 2782.5051 | -2.52 | 0 | (42) | 0.011    | 1 | R.HLLLDHMHITDGSSTGILGLDLAKI                                                                            |
| 9311 | 696.8332  | 2782.5038 | 2782.5051 | -0.54 | 0 | (54) | 0.00075  | 1 | R.HLLLDHMHITDGSSTGILGLDLAKI                                                                            |
| 9324 | 700.6314  | 2798.4963 | 2798.5000 | -1.34 | 0 | (38) | 0.035    | 1 | R.HLLLDHMHITDGSSTGILGLDLAKI + Oxidation (M)                                                            |
| 9325 | 933.8395  | 2798.4968 | 2798.5000 | -1.23 | 0 | 72   | 1.6e-005 | 1 | R.HLLLDHMHITDGSSTGILGLDLAKI + Oxidation (M)                                                            |
| 9326 | 700.6323  | 2798.4999 | 2798.5000 | -0.04 | 0 | (42) | 0.013    | 1 | R.HLLLDHMHITDGSSTGILGLDLAKI + Oxidation (M)                                                            |
| 9327 | 700.6323  | 2798.4999 | 2798.5000 | -0.04 | 0 | (43) | 0.01     | 1 | R.HLLLDHMHITDGSSTGILGLDLAKI + Oxidation (M)                                                            |
| 9328 | 590.7075  | 2798.5009 | 2798.5000 | 0.31  | 0 | (42) | 0.015    | 1 | R.HLLLDHMHITDGSSTGILGLDLAKI + Oxidation (M)                                                            |
| 9329 | 1400.2614 | 2798.5061 | 2798.5000 | 2.90  | 0 | (85) | 6.7e-005 | 1 | R.HLLLDHMHITDGSSTGILGLDLAKI + Oxidation (M)                                                            |
| 9389 | 729.1390  | 2912.5271 | 2912.5283 | -0.43 | 1 | (68) | 4.9e-005 | 1 | K.TASLQAFEHQSYPLELEIEKPLTR.D                                                                           |
| 9390 | 971.8504  | 2912.5294 | 2912.5283 | 0.38  | 1 | (45) | 0.011    | 1 | K.TASLQAFEHQSYPLELEIEKPLTR.D                                                                           |
| 9391 | 971.8536  | 2912.5391 | 2912.5283 | 3.70  | 1 | 77   | 5.2e-006 | 1 | K.TASLQAFEHQSYPLELEIEKPLTR.D                                                                           |
| 9393 | 729.3903  | 2913.5319 | 2913.5123 | 6.73  | 1 | (72) | 1.8e-005 | 1 | K.TASLQAFEHQSYPLELEIEKPLTR.D + Deamidated (NQ)                                                         |
| 9401 | 976.1926  | 2925.5561 | 2925.5546 | 0.50  | 1 | 82   | 0.00018  | 1 | R.IELSEIEVQLAQLSEVQDAAVTAVKDKG                                                                         |
| 9432 | 984.1576  | 2949.4609 | 2949.4171 | 11.5  | 0 | 71   | 5.9e-005 | 1 | K.FDLTLGGFTDENIGLQLEYATDLFAKE + 2 Deamidated (NQ)                                                      |
| 9433 | 1475.7358 | 2949.4571 | 2949.4171 | 13.8  | 0 | (83) | 0.00038  | 1 | K.FDLTLGGFTDENIGLQLEYATDLFAKE + 2 Deamidated (NQ)                                                      |
| 9436 | 984.8231  | 2951.4474 | 2951.4301 | 5.85  | 0 | (88) | 0.00019  | 1 | K.QTNLSALEHQEYFEDLVNQLDLPR.D + Gln->pyro-Glu (N-term Q)                                                |
| 9446 | 1485.2329 | 2968.4513 | 2968.4586 | -1.81 | 0 | (54) | 0.0033   | 1 | K.QTNLSALEHQEYFEDLVNQLDLPR.D                                                                           |
| 9447 | 990.4938  | 2968.4566 | 2968.4586 | 0.98  | 0 | 76   | 1.9e-005 | 1 | K.QTNLSALEHQEYFEDLVNQLDLPR.D                                                                           |
| 9448 | 990.8249  | 2968.4528 | 2969.4406 | 4.11  | 0 | (54) | 0.0031   | 1 | K.QTNLSALEHQEYFEDLVNQLDLPR.D + Deamidated (NQ)                                                         |
| 9473 | 1003.5390 | 3007.5952 | 3007.5729 | 7.41  | 0 | 46   | 0.0076   | 1 | K.QLSLTLPSHMIPAFFVQVDAIPLTANGKT + Deamidated (NQ); Gln->pyro-Glu (N-term Q); Oxidation (M)             |
| 9475 | 1003.8853 | 3008.6341 | 3008.6045 | 9.84  | 0 | (41) | 0.013    | 1 | K.QLSLTLPSHMIPAFFVQVDAIPLTANGKT + Deamidated (NQ)                                                      |
| 9483 | 1008.8822 | 3023.6248 | 3023.6154 | 3.09  | 0 | (39) | 0.03     | 1 | K.QLSLTLPSHMIPAFFVQVDAIPLTANGKT + Oxidation (M)                                                        |
| 9502 | 1020.5510 | 3058.6311 | 3058.6188 | 4.07  | 1 | 73   | 1.3e-005 | 1 | R.GYRIELSEIEVQLAQLSEVQDAAVTAVKD                                                                        |
| 9524 | 1545.2476 | 3088.4808 | 3088.4778 | 0.90  | 0 | 101  | 7.7e-008 | 1 | K.QASPSLSLWNGYGPTEINTTFFSFLIDR.E                                                                       |
| 9525 | 1030.5011 | 3088.4815 | 3088.4778 | 1.19  | 0 | (81) | 6.2e-006 | 1 | K.QASPSLSLWNGYGPTEINTTFFSFLIDR.E                                                                       |
| 9559 | 1051.2280 | 3150.6623 | 3150.6661 | 1.97  | 1 | 78   | 5.2e-006 | 1 | U K.AVADNPQPLSLSLVTETEKALLQAWK.G                                                                       |
| 9560 | 1051.5521 | 3151.6345 | 3151.6401 | -1.75 | 1 | (51) | 0.0033   | 1 | U K.AVADNPQPLSLSLVTETEKALLQAWK.G + Deamidated (NQ)                                                     |
| 9562 | 1051.5803 | 3151.7191 | 3151.7104 | 2.78  | 1 | 53   | 0.00085  | 1 | R.KQLSLTLPSHMIPAFFVQVDAIPLTANGKT + Oxidation (M)                                                       |
| 9580 | 1058.5573 | 3172.8499 | 3172.8257 | 7.32  | 1 | 95   | 1.2e-007 | 1 | R.MAQTGAVSFDAGTFFVGFALLNGAALYPVKKE                                                                     |
| 9582 | 1058.8785 | 3173.8138 | 3173.8107 | 0.97  | 1 | (50) | 0.0057   | 1 | R.MAQTGAVSFDAGTFFVGFALLNGAALYPVKKE + Deamidated (NQ)                                                   |
| 9583 | 798.1631  | 3188.8233 | 3188.8216 | 0.51  | 1 | (80) | 0.00081  | 1 | R.MAQTGAVSFDAGTFFVGFALLNGAALYPVKKE + Oxidation (M)                                                     |
| 9594 | 1063.8846 | 3188.8321 | 3188.8216 | 3.28  | 1 | (79) | 6.7e-006 | 1 | R.MAQTGAVSFDAGTFFVGFALLNGAALYPVKKE + Oxidation (M)                                                     |
| 9595 | 1064.2111 | 3189.8114 | 3189.8056 | 1.79  | 1 | (86) | 1e-006   | 1 | R.MAQTGAVSFDAGTFFVGFALLNGAALYPVKKE + Deamidated (NQ); Oxidation (M)                                    |
| 9596 | 1064.2148 | 3189.8227 | 3189.8056 | 5.35  | 1 | (51) | 0.0049   | 1 | R.MAQTGAVSFDAGTFFVGFALLNGAALYPVKKE + Deamidated (NQ); Oxidation (M)                                    |
| 9597 | 1064.2151 | 3189.8234 | 3189.8056 | 5.58  | 1 | (84) | 2.1e-006 | 1 | R.MAQTGAVSFDAGTFFVGFALLNGAALYPVKKE + Deamidated (NQ); Oxidation (M)                                    |
| 9601 | 798.6616  | 3190.6174 | 3190.5896 | 8.89  | 1 | (48) | 0.0084   | 1 | R.MAQTGAVSFDAGTFFVGFALLNGAALYPVKKE + 2 Deamidated (NQ); Oxidation (M)                                  |
| 9631 | 1073.5663 | 3217.6741 | 3217.6733 | 0.25  | 1 | (54) | 0.0016   | 1 | K.SALKETLPDYMIPAFWVTLNLPVTANGKV                                                                        |
| 9641 | 1079.2285 | 3234.6837 | 3234.6822 | 3.58  | 1 | 55   | 0.0014   | 1 | K.SALKETLPDYMIPAFWVTLNLPVTANGKV + Deamidated (NQ); Oxidation (M)                                       |
| 9673 | 1108.2289 | 3315.6848 | 3315.6412 | 7.13  | 1 | 127  | 1.4e-010 | 1 | K.VKQASPSLSLWNGYGPTEINTTFFSFLIDR.E                                                                     |
| 9701 | 890.2003  | 3386.7719 | 3386.7752 | -0.95 | 1 | 57   | 0.00072  | 1 | K.QLSLTLPSHMIPAFFVQVDAIPLTANGKTR.N + Deamidated (NQ); Oxidation (M)                                    |
| 9722 | 1173.8893 | 3518.8460 | 3518.8259 | 5.70  | 0 | 45   | 0.036    | 1 | R.SALDGNLHNLVAFENYPLDQELNGSMEDRL + Oxidation (M)                                                       |
| 9754 | 1215.2863 | 3642.8340 | 3642.8165 | 4.80  | 0 | 79   | 8.3e-008 | 1 | K.KPYTLNINYGPTENTVAVTSAEIHPEEGSLSIGRA                                                                  |
| 9755 | 911.9579  | 3643.8027 | 3643.8008 | 0.59  | 0 | (50) | 0.01     | 1 | K.KPYTLNINYGPTENTVAVTSAEIHPEEGSLSIGRA + Deamidated (NQ)                                                |
| 9757 | 1215.9443 | 3644.8112 | 3644.7846 | 7.31  | 0 | (82) | 0.00052  | 1 | K.KPYTLNINYGPTENTVAVTSAEIHPEEGSLSIGRA + 2 Deamidated (NQ)                                              |
| 9759 | 912.2146  | 3644.8303 | 3644.7846 | 12.5  | 0 | (48) | 0.013    | 1 | K.KPYTLNINYGPTENTVAVTSAEIHPEEGSLSIGRA + 2 Deamidated (NQ)                                              |
| 9777 | 1251.2747 | 3750.8022 | 3750.7975 | 1.25  | 0 | 72   | 7.4e-005 | 1 | R.LNDYFETNGVTTITFLPTQLAEQFMELENTSRLV + Deamidated (NQ); Oxidation (M)                                  |
| 9779 | 1251.2817 | 3750.8234 | 3750.7975 | 6.92  | 0 | (44) | 0.043    | 1 | R.LNDYFETNGVTTITFLPTQLAEQFMELENTSRLV + Deamidated (NQ); Oxidation (M)                                  |
| 9780 | 1251.0412 | 3752.8017 | 3752.7855 | 9.64  | 0 | (83) | 0.00059  | 1 | R.LNDYFETNGVTTITFLPTQLAEQFMELENTSRLV + 3 Deamidated (NQ); Oxidation (M)                                |
| 9793 | 759.3784  | 3791.8554 | 3791.8134 | 11.1  | 2 | 51   | 0.0098   | 1 | R.QLAAYMEASAVGGHQVLPKADKQDMPYPLSSAQKRLM + 2 Deamidated (NQ); Gln->pyro-Glu (N-term Q); 2 Oxidation (M) |
| 9840 | 1012.0079 | 4044.0024 | 4043.9786 | 5.88  | 1 | (78) | 2.4e-005 | 1 | R.NPLFNVMVTTEPNKQELTLQNLISISPYEAHQGTSK.F + Deamidated (NQ)                                             |
| 9845 | 1012.5095 | 4046.0090 | 4045.9983 | 2.63  | 0 | (52) | 0.0082   | 1 | K.YNFTDDVFGTVVSGRPSEINGIETMAGLFINTIPV.R.V + 2 Deamidated (NQ); Oxidation (M)                           |
| 9846 | 810.2141  | 4046.0339 | 4045.9983 | 8.79  | 0 | (45) | 0.027    | 1 | K.YNFTDDVFGTVVSGRPSEINGIETMAGLFINTIPV.R.V + 2 Deamidated (NQ); Oxidation (M)                           |
| 9847 | 1012.5165 | 4046.0368 | 4045.9983 | 9.51  | 0 | 81   | 6.5e-006 | 1 | K.YNFTDDVFGTVVSGRPSEINGIETMAGLFINTIPV.R.V + 2 Deamidated (NQ); Oxidation (M)                           |
| 9848 | 1012.5183 | 4046.0439 | 4045.9983 | 11.3  | 0 | (57) | 0.0014   | 1 | K.YNFTDDVFGTVVSGRPSEINGIETMAGLFINTIPV.R.V + 2 Deamidated (NQ); Oxidation (M)                           |
| 9857 | 1015.7585 | 4058.9688 | 4058.9686 | 1.79  | 1 | (86) | 3e-006   | 1 | R.NPLFNVMVTTEPNKQELTLQNLISISPYEAHQGTSK.F + Oxidation (M)                                               |
| 9858 | 1015.7570 | 4058.9687 | 4058.9686 | 2.27  | 1 | 90   | 1.1e-006 | 1 | R.NPLFNVMVTTEPNKQELTLQNLISISPYEAHQGTSK.F + Oxidation (M)                                               |
| 9869 | 1378.3311 | 4125.9713 | 4125.9463 | 6.08  | 0 | 74   | 5.1e-005 | 1 | R.TILSLPLDENDENPETAIVTAENLAYMITYSGTTGQPK.G + Deamidated (NQ)                                           |
| 9875 | 1038.2477 | 4140.9616 | 4140.9672 | 1.08  | 0 | (45) | 0.043    | 1 | R.TILSLPLDENDENPETAIVTAENLAYMITYSGTTGQPK.G + Oxidation (M)                                             |
| 9842 | 1507.4189 | 4519.2288 | 4519.2370 | -1.81 | 2 | (47) | 0.025    | 1 | K.NAGYVPVTEEDRMAGTAVSFDAGTFFVGFALLNGAALYPVKKE + Oxidation (M)                                          |
| 9848 | 1131.5693 | 4522.2463 | 4522.1890 | 13.1  | 2 | 55   | 0.0031   | 1 | K.NAGYVPVTEEDRMAGTAVSFDAGTFFVGFALLNGAALYPVKKE + 3 Deamidated (NQ); Oxidation (M)                       |
